# Supplementary material
Source: publisher figshare collection journal article supplement (https://tandf.figshare.com/articles/dataset/_/2374687)
Supplement: Supplementary file 1 [file 1]

Archive with 2 entries (2 files):
- 1149660_Raw Data.xls
- 1149660_Methods.pdf
