# Supplementary material
Source: publisher figshare collection journal article supplement (https://tandf.figshare.com/articles/dataset/_/2374687)
Supplement: Supplementary file 1 [file 1 › 1149660_Raw Data.xls]

## Sheet: All Genes
Gene Name	wild type (wt)	Gain(Myc)	Gain(Pvt1)	Gain (Myc+Pvt1)
0610005C13Rik	1.40239	0.354223	0.215995	0.466025
0610007P14Rik	23.4881	29.4588	22.0843	23.2878
0610009B22Rik	37.1509	50.7059	49.024	37.7174
0610009L18Rik	12.0937	14.1193	9.89488	8.63263
0610009O20Rik	18.3253	21.1929	21.1444	18.422
0610010B08Rik	2.28841e-07	0	2.7913e-07	0
0610010F05Rik	8.36519	8.80276	11.3109	10.1098
0610010K14Rik	38.3149	48.7485	36.7599	34.2647
0610011F06Rik	36.4722	55.0775	30.1913	28.0062
0610012G03Rik	27.7145	41.6976	30.7655	27.4049
0610030E20Rik	11.7102	14.0953	12.3805	14.7833
0610031J06Rik	57.1676	66.7366	49.2607	43.4388
0610031O16Rik	0	0	0	0
0610037L13Rik	19.3072	25.0395	21.024	17.4167
0610038B21Rik	0.390841	0.214975	0.256152	0.366449
0610039K10Rik	0.172005	0.0725212	0	0.20188
0610040B10Rik	8.91333	11.7115	9.19815	7.9509
0610040F04Rik	0	0	0.129884	0
0610040J01Rik	5.10053	8.28786	5.47875	9.22846
0610043K17Rik	1.42613	1.8178	1.31453	0.806714
1010001N08Rik	2.67532	2.22461	2.05728	1.62197
1100001G20Rik	131.788	144.886	214.829	29.3225
1110001J03Rik	101.135	138.615	90.347	96.2938
1110002L01Rik	0.751709	1.07321	0.912069	0.803497
1110004E09Rik	24.7356	24.986	23.2104	17.1171
1110004F10Rik	31.608	38.487	30.475	30.6228
1110006O24Rik	1.88422	3.73183	2.01947	1.71473
1110007C09Rik	41.3582	36.1823	28.6441	26.9275
1110008F13Rik	142.558	206.181	148.887	121.028
1110008L16Rik	5.86051	6.29856	5.55464	6.71619
1110008P14Rik	50.6808	84.8351	84.3394	46.9137
1110012L19Rik	15.9658	20.7656	16.6184	15.6283
1110015O18Rik	0	0	0	0
1110017D15Rik	0.572392	0.235066	0	0.132356
1110019D14Rik	1.39701	1.97234	4.10089	0.0231892
1110020A21Rik	2.43568	2.74807	1.90824	2.03872
1110025L11Rik	0	0	0	0
1110028F11Rik	0.155614	0.0652877	0.119043	0.143594
1110028F18Rik	0	0	0	0
1110032A03Rik	21.968	36.8183	32.2206	16.9643
1110032F04Rik	0.455262	0.137542	0.16721	2.09296
1110034G24Rik	7.26827	8.74235	7.24124	6.72687
1110036E04Rik	0	0	0	0
1110037F02Rik	10.2886	8.44813	9.32318	9.85112
1110038B12Rik	43.092	66.7844	44.4892	79.2307
1110038F14Rik	23.6234	28.7105	19.8943	21.4683
1110046J04Rik	6.01119	1.50722	5.44514	7.38269
1110051M20Rik	5.83497	4.6868	5.56182	5.75611
1110054M08Rik	13.7054	22.9488	19.9065	14.6753
1110057K04Rik	30.0499	36.5051	37.2578	30.6649
1110058L19Rik	42.2141	65.9334	56.441	43.3319
1110059E24Rik	19.8568	28.5187	22.1618	26.8528
1110059G10Rik	5.60819	8.12445	5.64339	6.05395
1110065P20Rik	29.0578	46.2364	31.2298	34.9281
1190002F15Rik	2.89257	1.56207	1.81505	3.43103
1190002N15Rik	13.4365	12.4331	11.0099	11.9485
1190003K10Rik	0	0	0	0
1190005I06Rik	36.8419	59.2215	32.2299	17.8057
1190007I07Rik	8.85316	11.0577	9.55057	10.5808
1200014J11Rik	5.37156	5.50457	5.94354	5.7003
1300002E11Rik	18.784	28.1149	19.8251	19.6452
1300002K09Rik	0.254563	0.080047	0.0729407	0.281292
1300017J02Rik	0.0417172	0.131338	0.0958282	0.0433776
1500004A13Rik	0.581577	0.492965	0.63757	0.92551
1500009C09Rik	0.0645003	0	0	0.0224326
1500009L16Rik	0.910286	0.438163	0.951469	1.12337
1500011B03Rik	8.09306	23.0336	15.9717	13.8081
1500011K16Rik	55.4798	88.8893	85.6781	53.9728
1500012F01Rik	69.726	132.918	67.5945	135.191
1500012K07Rik	0	0	0	0.156935
1500015A07Rik	2.78028	3.7004	5.25947	2.87067
1500015L24Rik	0	0	0	0.368481
1500015O10Rik	15.9086	12.7274	4.41836	8.28817
1500017E21Rik	1.12092	2.12772	3.61349	1.35366
1600002D24Rik	0	0.246605	0	0.0363288
1600002H07Rik	3.60764	5.18926	3.60773	3.69187
1600002K03Rik	16.4547	25.1729	13.6185	16.0096
1600010M07Rik	1.94457	0.652318	1.2008	1.4003
1600012H06Rik	20.7097	25.3547	22.4302	22.2825
1600014C10Rik	68.2574	85.2543	71.9065	52.9523
1600014C23Rik	0.133047	0	0.157377	0
1600014K23Rik	0.0670031	0	0.0778861	0
1600015I10Rik	0	0	0	0
1600016N20Rik	0.3279	1.44581	1.18442	0.845254
1600019K03Rik	0	0	0	0
1600020E01Rik	14.6479	23.9197	14.5617	19.0004
1600023N17Rik	0.212878	0.808126	0.246565	0.224685
1600025M17Rik	0.2444	0	0	0
1600027J07Rik	0	0	0	0
1600029I14Rik	0	0	0	0
1600029O15Rik	0.134337	0	0.154532	0.186759
1700001C02Rik	0	0	0.0974542	0
1700001C19Rik	0.075671	0.156142	0.0436461	0.13248
1700001D01Rik	0	0	0	0
1700001F09Rik	0	0	0	0
1700001G11Rik	0.451441	0.286561	0.262944	0.641871
1700001G17Rik	0.311486	0.473626	0.0723267	0.220105
1700001J03Rik	0.666758	0.752311	0.0862773	0.315841
1700001J11Rik	0.0381807	0	0.0438322	0.0528909
1700001K19Rik	0.113975	0	0.0660706	0
1700001K23Rik	0	0	0	0
1700001L05Rik	0.605755	0.554544	0.984367	0.793479
1700001L19Rik	0.107536	0.169429	0.0309257	0.0560629
1700001O22Rik	1.79265	2.87353	0.601846	1.98394
1700001P01Rik	0.100454	0	0	0.144544
1700003C15Rik	0	0	0	0
1700003D09Rik	0.0362893	0	0.304344	0.0522568
1700003E16Rik	0.350755	0.235667	0.241873	0.340796
1700003E24Rik	0	0	0	0
1700003F12Rik	0.160478	0	0.280789	0.171536
1700003G13Rik	0.169226	0.107573	0.296435	0.362521
1700003G18Rik	0.202782	0.258456	0.47572	0
1700003H04Rik	0	0	0	0
1700003L19Rik	0	0	0	0
1700003M02Rik	0	0.0359391	0	0
1700003M07Rik	0.0242694	0	0.0278996	0
1700003P14Rik	0	0	0	0
1700006A11Rik	0	0	0	0
1700006E09Rik	0	0	0	0
1700006F04Rik	0	0	0	0
1700006H21Rik	0	0	0	0
1700007B14Rik	0.0234684	0	0	0.0162866
1700007F19Rik	0	0	0	0
1700007G11Rik	0	0.904973	0.452413	0.275505
1700007J10Rik	0	0	0.0546525	0.132646
1700007K09Rik	0.179351	0	0	0
1700007K13Rik	0.0709402	0.270017	0.0825478	0.452986
1700007L15Rik	1.64256	2.48367	2.91807	2.50583
1700007P06Rik	0	0	0	0
1700008F21Rik	0	0	0	0
1700008I05Rik	0.0274269	0	0	0
1700008J07Rik	2.59921	3.12598	2.71694	2.44555
1700008K24Rik	0	0	0	0
1700008O03Rik	0.181178	0.382514	0.0700807	0.213187
1700008P02Rik	0	0	0	0
1700009C05Rik	0	0	0	0
1700009J07Rik	0.060142	0	0	0.212277
1700009N14Rik	0	0	0	0
1700009P17Rik	3.04307	6.6555	3.34397	2.03081
1700010B08Rik	0	0	0	0
1700010D01Rik	0	0	0	0
1700010I02Rik	0	0	0	0
1700010I14Rik	0.541133	0.519584	0.592673	0.25064
1700010J16Rik	0	0	0	0
1700010K23Rik	0	0.53727	0	0
1700011A15Rik	0	0.0773714	0	0.0431303
1700011B04Rik	0.0951742	0	0	0
1700011E24Rik	0	0	0	0
1700011H14Rik	0	0.0562962	0.0514792	0
1700011I03Rik	0.168098	0.0709336	0.194841	0.0394787
1700011L22Rik	0	0	0	0.0389124
1700011M02Rik	0	0	0	0
1700012A03Rik	0	0	0	0
1700012B07Rik	0.406917	0.368064	0	1.92687
1700012B09Rik	0	0	0	0
1700012D01Rik	1.03551	1.86552	2.11718	1.35671
1700012D14Rik	0.397224	0.885717	1.04778	1.07111
1700012I11Rik	0	0.0648622	0	0.0360454
1700012L04Rik	0	0	0	0
1700012P22Rik	0	0.0704752	0	0
1700013D24Rik	0	0.162275	0	0
1700013F07Rik	0.216953	0.27681	0	0
1700013G24Rik	0	0	0	0
1700013H16Rik	0	0	0.14582	0.0589241
1700015E13Rik	0	0.211805	0.486316	0.475657
1700015F17Rik	0.167594	0.213046	0.0978382	0
1700015G11Rik	0	0	0	0
1700016C15Rik	0.23381	0.197972	0.545135	0.55478
1700016D06Rik	0	0	0	0
1700016G22Rik	0	0	0	0
1700016H13Rik	0.0729626	0.0925999	0	0.103632
1700016K19Rik	0.297825	0.0754449	0.138211	0.168147
1700016L04Rik	0	0	0	0
1700016L21Rik	0	0	0	0
1700016P04Rik	0	0	0	0
1700017B05Rik	6.58899	7.61504	7.46098	7.44973
1700017D01Rik	0	0	0	0
1700017G19Rik	0	0	0	0
1700017J07Rik	0	0	0	0
1700017N19Rik	0	0	0	0
1700018A04Rik	0	0	0	0
1700018B08Rik	0	0	0	0
1700018B24Rik	0	0	0	0
1700018C11Rik	0	0	0	0
1700018F24Rik	0	0	0	0
1700018G05Rik	0	0	0	0
1700018L02Rik	2.26469	2.64145	3.08747	2.65828
1700019A02Rik	0	0	0.116969	0
1700019B03Rik	0.061143	0	0	0.021287
1700019B21Rik	0	0	0	0
1700019D03Rik	1.21732	0.171523	1.33664	4.74287
1700019E08Rik	0.0979629	0	0	0
1700019G17Rik	1.62833	2.40926	2.64169	2.0833
1700019G24Rik	0	0	0	0
1700019L03Rik	0.147287	0.233324	0.101157	0.203854
1700019M22Rik	0	0	0	0
1700019N19Rik	0	0	0	0.0838373
1700019O17Rik	0	0	0	0
1700020A23Rik	0	0.108213	0	0.0950593
1700020D05Rik	0.682659	0.0664418	0.608107	0.775691
1700020G17Rik	0	0	0	0
1700020I14Rik	31.2745	27.0154	40.7514	49.8565
1700020L24Rik	15.7476	12.9484	10.5643	5.80339
1700020M21Rik	0	0	0	0
1700020N01Rik	0	0	0.0578356	0.0351124
1700020N15Rik	0	0	0	0
1700020N18Rik	0	0.156236	0	0
1700021F05Rik	32.597	44.2603	46.1184	27.1092
1700021F07Rik	0	0	0	0
1700021K19Rik	9.6088	10.2169	9.64658	9.72673
1700021N21Rik	0.0609005	0	0	0.086012
1700022A21Rik	0	0	0	0
1700022A22Rik	0	0	0	0
1700022E09Rik	0	0	0	0
1700022H16Rik	0	0	0	0
1700022I11Rik	0	0	0	0.0169805
1700023C21Rik	0	0	0	0
1700023E05Rik	0.0284502	0	0	0
1700023F02Rik	0	0	0	0
1700023F06Rik	0.69011	1.47142	0.946695	0.392699
1700023L04Rik	9.69622	10.196	6.26743	3.8061
1700024B18Rik	0	0	0	0
1700024F13Rik	0	0	0	0.13034
1700024G13Rik	0	0	0	0
1700024P04Rik	0	0	0	0
1700024P16Rik	0.605651	0.399069	0.981665	1.26167
1700025B11Rik	0	0	0	0
1700025C18Rik	0	0	0	0
1700025F22Rik	0	0	0	0
1700025F24Rik	0	0	0	0
1700025G04Rik	5.72215	3.42585	5.7544	8.05254
1700025K24Rik	0	0	0	0
1700025M24Rik	0	0	0	0
1700025N23Rik	0	0	0	0.0863854
1700026D08Rik	0	0.0995483	0	0.220461
1700026D11Rik	0	0	0	0
1700026F02Rik	0	0	0	0
1700026L06Rik	1.35916	0.345905	0.317949	0.583981
1700027A15Rik	0	0	0	0
1700027F09Rik	0	0	0	0
1700027H10Rik	0	0	0	0
1700027I24Rik	0	0	0	0
1700027J07Rik	0	0	0	0
1700028B04Rik	0	0	0	0
1700028D13Rik	0	0	0	0
1700028E10Rik	0.11625	0.0875247	0.0649071	0.0775278
1700028I16Rik	0	0	0	0
1700028J19Rik	0.567472	0.220632	0.252167	0.519843
1700028K03Rik	0.313006	0.266758	0.381796	0.33102
1700028M03Rik	0	0	0	0
1700028P14Rik	0	0	0	0
1700028P15Rik	0	0	0	0
1700029B22Rik	0	0	0	0
1700029F12Rik	0	0	0	0
1700029H14Rik	0	0.0884177	0.0435304	0.0244428
1700029I15Rik	1.25825	1.31236	1.22941	1.75547
1700029J03Rik	0	0	0	0
1700029J07Rik	1.36424	1.82435	1.17401	1.07385
1700029M20Rik	0	0	0	0
1700029N11Rik	0	0	0	0
1700029P11Rik	0	0	0	0
1700030A11Rik	0	0	0	0.044086
1700030C10Rik	0.255217	0.715014	0.0326331	0.236702
1700030F04Rik	0	0	0	0
1700030F18Rik	0	0.128923	0	0.072801
1700030J22Rik	0.18763	0.216427	0.394553	0.464953
1700030K09Rik	4.35466	5.09111	4.91041	4.60585
1700030L20Rik	0	0	0	0
1700030M09Rik	0	0	0.065203	0
1700030N03Rik	0	0	0	0
1700030O20Rik	0	0	0	0
1700031A10Rik	0	0	0	0
1700031F05Rik	0	0	0	0
1700031M16Rik	0	0	0	0
1700031P21Rik	0	0	0	0
1700034E13Rik	0	0	0	0
1700034F02Rik	0.088655	0.195432	0.229204	0.138366
1700034G24Rik	0	0	0	0
1700034H15Rik	0.184517	0.147112	0.271825	0.206504
1700034I23Rik	0.0201806	0	0	0
1700034J05Rik	0.0472186	0	0.0271376	0.0163859
1700034K08Rik	0	0	0	0
1700034O15Rik	0	0	0	0
1700034P13Rik	0.22776	0.185704	0.275807	0.287393
1700036G14Rik	0	0	0	0
1700037C18Rik	1.96757	2.97325	2.7754	1.65059
1700037H04Rik	119.084	218.992	178.669	77.7129
1700039E15Rik	0	0	0	0
1700039E22Rik	0	0	0	0
1700040L02Rik	0.290673	0.157361	0.239747	0.435906
1700041C23Rik	0	0	0	0
1700041M19Rik	0	0	0	0
1700042B14Rik	0	0	0	0
1700042G07Rik	0	0	0	0
1700042G15Rik	0	0	0	0
1700042O10Rik	0.0491844	0	0	0.0345434
1700044C05Rik	0	0	0	0
1700044K03Rik	0	0	0	0
1700045H11Rik	0	0	0	0
1700046C09Rik	0	0	0	0
1700047A11Rik	0	0	0	0.072979
1700047E10Rik	0	0	0	0
1700047G03Rik	0.670031	1.27441	7.24341	1.61333
1700047I17Rik2	0	0	0	0.0164426
1700047L14Rik	0	0	0	0
1700047M11Rik	0.175726	0	0.20539	0
1700048M11Rik	0.596042	0.191281	0.35402	0.329217
1700048O20Rik	1.67903	1.12419	2.11217	2.24241
1700049E15Rik	0	0	0	0
1700049E22Rik	0	0	0	0
1700049G17Rik	1.39138	2.31005	2.06398	2.34064
1700049L16Rik	0	0	0	0
1700051A21Rik	0	0	0	0
1700052I22Rik	0	0	0	0
1700052K11Rik	4.28429	4.33509	5.7052	5.10948
1700052N19Rik	9.11219	9.96227	10.7032	9.08664
1700054A03Rik	0	0	0	0
1700054K19Rik	0	0	0	0
1700054M17Rik	0	0	0	0
1700054O13Rik	0	0	0	0
1700055C04Rik	0	0	0	0
1700055N04Rik	0.28852	0.514973	0.193464	0.450664
1700056E22Rik	2.7456	3.4048	3.76693	1.3028
1700057G04Rik	0	0	0	0
1700057H15Rik	0	0	0	0
1700060C16Rik	0	0	0	0
1700060C20Rik	0	0.139111	0.51255	0
1700061F12Rik	0	0	0	0
1700061G19Rik	0.0768	0.0725187	0.0440852	0.106395
1700061I17Rik	0	0	0	0
1700063A18Rik	0	0	0	0
1700063D05Rik	0	0	0	0
1700063O14Rik	0	0	0	0
1700064J06Rik	0	0	0	0
1700064M15Rik	0	0	0	0
1700065D16Rik	0	0	0	0
1700065I16Rik	0	0	0	0
1700065J11Rik	0	0	0	0.137549
1700065J18Rik	0	0	0	0
1700065L07Rik	0	0	0	0
1700065O20Rik	0	0	0	0
1700066B17Rik	0	0	0	0
1700066B19Rik	0.244311	0.33123	0.172586	0.143166
1700066M21Rik	3.62744	4.11768	4.47911	5.48625
1700066N21Rik	0	0	0	0
1700066O22Rik	0	0	0	0
1700067G17Rik	0	0	0.123978	0
1700067K01Rik	0.0486885	0.369412	0.281633	0.136749
1700067P10Rik	0	0	0	0
1700069L16Rik	0	0	0	0
1700069P05Rik	0	0	0	0
1700071K01Rik	0	0	0	0
1700071M16Rik	0.0941005	0	0.215733	0.143351
1700072B07Rik	0	0	0	0
1700072O05Rik	0	0	0	0
1700073E17Rik	0	0.0123974	0.0225865	0.0204033
1700074H08Rik	0	0	0	0
1700074P13Rik	0	0	0	0
1700080E11Rik	0	0	0	0
1700080N15Rik	0	0	0	0
1700080O16Rik	0	0	0	0
1700081H04Rik	0	0	0	0
1700084C01Rik	0	0	0.0401224	0.121418
1700084E18Rik	1.25364	3.46407	1.71572	0.401547
1700084F23Rik	0	0	0	0
1700084J12Rik	0.402682	0	0.28192	0.229595
1700085C21Rik	0	0	0	0.171329
1700086L19Rik	0	0	0	0.0490885
1700086O06Rik	2.29327	3.85648	3.50363	2.3361
1700088E04Rik	1.25189	1.74267	0.781464	0.415712
1700091H14Rik	0	0	0	0
1700092C02Rik	0	0	0	0
1700092C10Rik	0	0	0	0
1700092E19Rik	0	0	0	0
1700092K14Rik	0	0	0	0
1700092M07Rik	0	0	0.279669	0.176598
1700093K21Rik	0.0536123	0.135691	0.0444309	0.0377305
1700094D03Rik	1.79493	2.99243	2.65879	1.77862
1700094J05Rik	0	0	0	0
1700094M24Rik	0	0	0	0
1700095A21Rik	0	0	0	0
1700095B10Rik	0	0	0	0
1700096J18Rik	0	0.212921	0	0
1700096K18Rik	6.70426	12.9516	9.40051	4.0741
1700097N02Rik	0.0664906	0.084304	0	0
1700100L14Rik	0	0	0	0
1700101E01Rik	0.235039	0	0.136313	0.248717
1700101I11Rik	0	0.269129	0.0822747	0.20065
1700101O22Rik	0	0	0	0
1700102H20Rik	0.412564	0.534191	1.24424	0.312531
1700102P08Rik	0.527303	0.606111	0.166338	0.201885
1700104L18Rik	0	0	0	0.231384
1700105P06Rik	0	0.458213	0	0.08677
1700106J16Rik	0	0	0	0
1700108F19Rik	0.128461	0.488466	0.223827	0.0454282
1700108J01Rik	0	0	0	0
1700109G14Rik	0	0	0	0
1700109G15Rik	0	0.585779	0	0.172517
1700109H08Rik	0.0829971	0	0.290739	0.0592212
1700109I08Rik	0	0	0	0
1700109K24Rik	0.241817	0.183464	0.839186	1.22234
1700110C19Rik	0.0819022	0.208169	0.0955781	0.584098
1700110I01Rik	0	0	0	0
1700110K17Rik	0	0	0	0
1700111N16Rik	0	0	0	0
1700112E06Rik	14.2527	22.9508	18.7816	14.3688
1700112H15Rik	0	0	0	0
1700112J05Rik	0	0	0	0
1700113A16Rik	9.71732	14.7314	9.28789	7.30681
1700113H08Rik	0	0	0.130605	0
1700119H24Rik	0	0	0	0.397982
1700120C14Rik	0.642904	0.554452	2.76686	2.18896
1700120E14Rik	0	0	0	0
1700120G07Rik	0	0	0.0728573	0
1700120K04Rik	0.741539	0.632183	0.437469	0.719252
1700121L16Rik	0	0	0	0
1700121N20Rik	0	0	0	0
1700122O11Rik	0.149958	0	0	0
1700123I01Rik	0.061143	0.0771095	0.0352012	0
1700123K08Rik	0	0	0	0.0357004
1700123L14Rik	0	0	0.0330898	0
1700123M08Rik	1.34164	0.754141	1.43752	1.46609
1700123O12Rik	0	0	0	0
1700123O20Rik	20.7675	28.1267	26.0173	25.1615
1700123O21Rik	0	0	0	0
1700124L16Rik	0.280907	0	0	0.221033
1700125G02Rik	0	0	0	0
1700125G22Rik	0	0	0.0754022	0
1700125H03Rik	0	0	0	0.219478
1700125H20Rik	0.110921	0	0	0
1700126H18Rik	0	0	0	0
1700128A07Rik	0	0	0	0.0459883
1700128F08Rik	0	0	0	0
1700129C05Rik	0	0	0	0
1810006J02Rik	0.145295	0.183195	0.167232	0.303295
1810007C17Rik	0	0	0	0
1810007D17Rik	0	0	0	0
1810008I18Rik	0	0	0	0.186548
1810009A15Rik	47.361	55.1587	39.315	46.9892
1810009J06Rik	0	0	0	0
1810010D01Rik	0.409106	4.58876	1.49126	0.453461
1810010H24Rik	4.54896	6.59928	6.03686	4.50369
1810011H11Rik	3.25545	3.55136	2.81377	2.5304
1810011O10Rik	86.1114	85.1274	73.7403	59.3965
1810012K16Rik	0	1.10953	0.292505	0.360712
1810013A23Rik	0	0	0	0
1810013L24Rik	18.7051	22.5083	27.4448	17.4208
1810014B01Rik	3.31596	3.26102	4.97389	3.4949
1810018F18Rik	0	0	0	0
1810019D21Rik	1.11586	4.53736	2.12927	3.16023
1810020O05Rik	0	0	0.0587944	0.0357004
1810021B22Rik	1.78486	2.51156	2.0895	1.54968
1810022K09Rik	13.0578	17.4466	14.756	20.7357
1810024B03Rik	0.0404428	0.102158	0.046687	0.113156
1810026B05Rik	5.12805	7.3383	5.94817	4.87406
1810026J23Rik	21.2012	21.5154	22.9389	19.8586
1810030O07Rik	16.8506	18.0176	18.314	16.5335
1810032O08Rik	10.9173	17.9549	19.3287	13.4408
1810034E14Rik	0.620635	0.918337	1.55208	0.262614
1810037I17Rik	42.3179	49.1492	43.9711	21.6138
1810041L15Rik	0.0683171	0.200348	0.165082	0.0627614
1810043G02Rik	13.0561	18.5008	13.6637	12.621
1810043H04Rik	46.6686	66.305	37.8136	38.076
1810044D09Rik	9.2921	14.3861	9.63255	7.05522
1810046K07Rik	0	0	0	0.0269601
1810053B23Rik	0	0	0	0
1810055G02Rik	13.7791	8.81195	12.1504	13.1628
1810058I24Rik	98.4834	142.628	116.623	81.6829
1810062G17Rik	1.14746	0.306011	1.12129	0.127912
1810062O18Rik	0.557383	1.74301	1.0513	0.112295
1810064F22Rik	0.0823688	0.233393	0.354734	0.128452
1810065E05Rik	0	0.22509	0.206168	0.585217
2010001E11Rik	0.249108	0.130709	0.166894	0.100726
2010002M12Rik	0.136947	0.155048	0.0627994	0.0946208
2010003K11Rik	12.0721	36.1421	31.7627	19.3869
2010005H15Rik	0	0	0	0
2010009K17Rik	0.803448	0	0.405331	1.47883
2010010A06Rik	0.0958036	0.122005	0	0.137549
2010012O05Rik	12.1102	17.7353	11.5731	12.0135
2010015L04Rik	0.175116	0.0193406	0.4693	0.426625
2010016I18Rik	5.26875	7.76583	4.3593	2.97023
2010106C02Rik	0	0	0	0
2010106E10Rik	0	0	0.0941556	0
2010107E04Rik	537.432	772.927	742.579	664.88
2010107G12Rik	0.0220995	0.0278354	0.0761714	0.168609
2010107G23Rik	4.14959	7.58014	5.52222	5.61543
2010109A12Rik	0.365572	0	0	0
2010109I03Rik	0.256315	0.419913	0.0294753	0.0534202
2010111I01Rik	19.2851	26.5973	24.2305	22.7984
2010204K13Rik	3.27763	1.24277	1.18048	1.84505
2010300C02Rik	2.55375	2.94887	2.34016	3.3223
2010308F09Rik	0.464546	0	0	0.114362
2010310C07Rik	0.0664906	0	0	0
2010315B03Rik	6.33044	12.5138	9.17864	12.6792
2010320M18Rik	17.6625	30.6109	22.2408	19.0597
2200002D01Rik	13.0799	21.5257	16.4692	10.5883
2200002J24Rik	0	0	0	0
2210010C04Rik	0	0	0	0
2210011C24Rik	0.789494	0.230803	0.352393	0.17153
2210013O21Rik	27.6601	38.2147	35.7102	25.7281
2210015D19Rik	9.7748	10.7286	14.7907	11.514
2210016F16Rik	19.7101	24.5349	21.4184	15.2361
2210016L21Rik	19.2924	24.0188	20.6604	21.8521
2210018M11Rik	7.00369	4.26075	5.69261	7.60403
2210019I11Rik	0	0	0	0
2210039B01Rik	0	0.259449	0	0.108136
2210404O09Rik	1.24199	2.45415	2.11543	2.79136
2210407C18Rik	1.26406	2.2427	0.88075	0.491481
2210408F21Rik	18.3452	20.9454	22.3953	18.1313
2210408I21Rik	2.18715	1.76266	2.1634	2.07646
2210409D07Rik	0	0	0.582977	0.120845
2210409E12Rik	0	0	0	0
2210414B05Rik	0	0	0	0
2210416O15Rik	0.309162	0.592816	0.581869	0.612395
2210417A02Rik	0.242356	0	0	0
2210420H20Rik	0	0	0	0
2300002M23Rik	0	0	0	0
2300003K06Rik	0	0	0	0
2300005B03Rik	0	0	0	0.11798
2300009A05Rik	17.6345	40.6265	21.4683	13.1889
2310001H17Rik	6.60993	12.3854	10.9246	10.0689
2310001K24Rik	1.29895	2.71515	1.54855	0.361086
2310002D06Rik	0.137248	0	0	0.100502
2310002F09Rik	0.0551864	0.0231572	0.295604	0.152848
2310002J15Rik	0.884488	2.7131	1.28745	2.87997
2310002L09Rik	9.06053	0.0314992	7.83202	11.3793
2310003H01Rik	8.40502	7.91727	7.08224	8.07505
2310005A03Rik	0	0	0	0
2310005E17Rik	0	0	0	0
2310005G13Rik	0.090683	0.114101	0.0866658	0.114943
2310007B03Rik	0.268787	0.0520074	0.0474212	0.114616
2310007L24Rik	0.218162	0	0.253977	0.258191
2310008N11Rik	0.116626	0	0.274705	0
2310009A05Rik	41.6306	56.9277	45.4497	42.4897
2310009B15Rik	5.38037	7.45575	5.79398	5.30645
2310010J17Rik	7.17803	10.1237	7.87508	4.97415
2310011J03Rik	37.047	41.0414	31.9081	26.2787
2310014L17Rik	1.3833	2.08119	1.71689	1.28126
2310015A10Rik	2.68974	3.32274	3.58276	4.14095
2310015B20Rik	15.3693	0.444934	15.6896	10.9359
2310015D24Rik	0.653769	0	0.731639	0.639662
2310016D03Rik	0	0	0	0
2310020H05Rik	0.0825243	0	0	0.0588707
2310022A10Rik	10.0122	6.80645	9.76529	8.52139
2310022B05Rik	15.791	18.0052	15.8812	14.2951
2310030A07Rik	0	0	0	0
2310030G06Rik	6.28773	10.5028	7.2125	7.15006
2310033P09Rik	13.0429	15.0109	12.0005	12.0539
2310034C09Rik	0	0	0	0
2310034G01Rik	1.89391	2.21869	2.12009	1.55183
2310034O05Rik	0	0.0600112	0	0.0333095
2310035C23Rik	5.66775	8.60759	9.00745	9.39813
2310036O22Rik	89.8201	116.559	84.254	72.7967
2310039H08Rik	30.4862	50.3687	30.0266	26.0232
2310039L15Rik	0	0	0	0
2310040G24Rik	12.2159	4.54607	12.2931	15.0059
2310042E22Rik	0	0	0	0
2310043L19Rik	0	0	0.200416	0
2310043O21Rik	0	0	0	0
2310045N01Rik	37.2235	51.6837	46.9676	36.3707
2310047M10Rik	14.2206	14.6254	13.1306	9.69794
2310050C09Rik	0	0	0	0
2310057J18Rik	0	0	0	0
2310057M21Rik	4.42646	4.57352	5.62786	4.66357
2310057N15Rik	0	0	0	0
2310061I04Rik	24.5357	44.1336	29.7192	20.5348
2310061J03Rik	11.4139	15.7786	11.4998	6.53699
2310061N02Rik	0	0	0	0
2310065F04Rik	1.20125	0	1.24053	2.44639
2310067B10Rik	14.0392	12.0767	11.9841	13.2657
2310068J16Rik	0.892879	1.18857	0.927521	0.983932
2310069B03Rik	0.0795206	0.133634	1.18907	0.552669
2310069G16Rik	0.0648194	0.90361	0.677591	0.413433
2310079G19Rik	0	0	0	0
2310081J21Rik	0	0	0	0
2410002F23Rik	10.2184	13.0276	11.8303	15.7899
2410003L11Rik	0.103319	0.263447	0.606266	0
2410004B18Rik	16.5827	18.4634	17.5469	15.587
2410004I01Rik	0	0.0721527	0.132141	0.160678
2410004N09Rik	44.9509	104.602	38.4961	71.5437
2410004P03Rik	0.0554837	0.069932	0.0638283	0.192906
2410006H16Rik	149.4	319.804	144.63	242.014
2410007B07Rik	0	0	0	0
2410012E07Rik	0	0	0	0
2410012M07Rik	0	0	0	0
2410015M20Rik	117.743	151.972	123.48	99.9659
2410016O06Rik	8.16937	6.12126	5.21179	6.63971
2410017I17Rik	0	0	0.0758905	0.0229573
2410018L13Rik	0	0.0451228	0	0
2410021H03Rik	0	0	0.177489	0.0541689
2410076I21Rik	2.07364	0.71666	2.55375	2.08746
2410088K16Rik	0	0	0	0
2410089E03Rik	1.64923	1.37588	1.88611	2.40011
2410114N07Rik	0	0	0	0
2410124H12Rik	0	0	0	0
2410127L17Rik	0.365486	0.316524	0.761238	0.316983
2410131K14Rik	6.25984	5.65009	6.47927	7.41539
2410137M14Rik	0.0645166	0	0.224841	0.182547
2410141K09Rik	0	0	0	0
2500004C02Rik	1.78264	3.08083	2.86984	2.86588
2510002D24Rik	14.7427	18.4125	15.0474	15.5217
2510003E04Rik	22.7348	24.64	25.1154	19.2446
2510009E07Rik	9.71041	8.48192	10.3875	11.3335
2510039O18Rik	28.5452	31.6411	25.5471	23.3893
2510049J12Rik	0.055539	0.0932224	0.106251	0.205111
2610001J05Rik	28.0191	29.3345	26.6792	23.8078
2610002J02Rik	22.9558	43.5008	24.2385	20.5923
2610002M06Rik	5.42349	5.58861	5.66203	7.19311
2610005L07Rik	0.284613	0.171799	0.352179	0.510746
2610008E11Rik	6.1356	7.87751	8.0398	9.32879
2610015P09Rik	2.5813	3.02496	2.55433	3.30433
2610016A17Rik	66.4217	85.9173	75.8938	39.496
2610018G03Rik	2.87883	1.81352	2.7852	3.46403
2610020C07Rik	0.450504	0.196548	0.588983	0.665264
2610020H08Rik	5.92375	4.90136	3.6874	4.82405
2610027K06Rik	0.108424	0.111688	0.0721329	0.271085
2610028E06Rik	0	0.0489327	0.148633	0.0179132
2610028H24Rik	0.161867	0.14599	0.378601	0.139289
2610034B18Rik	12.8468	13.2685	12.8795	11.9043
2610034M16Rik	0.0763901	0.0686124	0.112516	0.0376523
2610035D17Rik	1.39045	0.76048	1.2673	0.984473
2610035F20Rik	0	0	0	0
2610037D02Rik	0	0.0476785	0.0289635	0
2610044O15Rik8	3.48321	7.08742	3.53412	5.20605
2610100L16Rik	0	0	0	0
2610203C20Rik	10.5621	11.9433	11.642	20.9422
2610203C22Rik	2.31265	0.260515	1.09744	2.54677
2610206C17Rik	0.740675	0.466901	0.950733	0.693591
2610207O16Rik	0	0	0	0
2610301B20Rik	8.27891	12.8153	10.4201	9.90623
2610305D13Rik	5.55736	13.2991	6.75766	4.33051
2610306M01Rik	5.51879	9.396	6.86707	7.28914
2610307P16Rik	1.02195	1.95884	1.94756	2.72494
2610316D01Rik	0.475868	1.13011	0.0690093	0.0419776
2610318N02Rik	0	0.102158	0	0.113156
2610507B11Rik	57.9384	45.3515	62.6967	58.807
2610507I01Rik	3.81183	4.79685	0.698144	5.67182
2610524H06Rik	7.90055	10.5882	5.55034	10.9788
2610528A11Rik	0.384853	2.44362	0.448534	0.876246
2610528J11Rik	6.60648	11.2593	8.01404	5.68093
2700029M09Rik	24.8942	28.1894	19.648	23.5506
2700038G22Rik	2.58155	3.91005	3.11138	5.89036
2700046A07Rik	0.0447681	0.028195	0.0257193	0.108693
2700046G09Rik	1.1093	2.98673	2.41612	1.25221
2700049A03Rik	1.51119	1.42005	1.55597	1.99298
2700054A10Rik	0.293109	0.326544	0.260305	0.313586
2700060E02Rik	18.7186	28.5603	19.2528	15.7573
2700062C07Rik	7.96182	9.35312	7.42235	6.87067
2700069I18Rik	0.662243	0.653765	0.514091	0.365899
2700070H01Rik	0	0	0.0321679	0.038885
2700081O15Rik	13.9149	12.6751	11.0266	15.0092
2700086A05Rik	0.135047	0.342508	0.392509	0.239155
2700089E24Rik	91.9555	139.118	112.727	99.981
2700089I24Rik	0	0	0	0
2700094K13Rik	32.1788	36.3966	31.8756	40.8847
2700097O09Rik	6.07228	6.54261	5.84691	6.49617
2700099C18Rik	0.882352	0.661204	0.462952	2.29982
2810001G20Rik	5.75691	9.46606	6.04215	7.82921
2810002D19Rik	1.85209	2.67672	2.52234	4.36749
2810004N23Rik	26.7929	28.2903	26.9831	30.4819
2810006K23Rik	8.21717	8.98902	9.4648	6.1668
2810007J24Rik	0	0	0	0
2810008D09Rik	20.9515	56.9741	23.7336	34.6059
2810013P06Rik	8.70826	16.3671	12.457	10.1506
2810021J22Rik	1.4886	1.46457	2.54103	1.88711
2810025M15Rik	14.2007	15.1548	9.85046	10.1274
2810029C07Rik	0.320543	0.745649	0.651999	0.410933
2810032G03Rik	0.366715	0.514642	1.17602	0.826651
2810047C21Rik1	0	0	0	0
2810049E08Rik	0	0	0	0
2810055G20Rik	0.484601	0.979225	0.858807	0.944027
2810403A07Rik	22.1982	27.7763	29.1709	33.0013
2810403D21Rik	1.22856	1.75745	2.35112	1.12767
2810404M03Rik	0	0	0	0
2810405F15Rik	0.0960378	0	0	0.0446105
2810408A11Rik	1.20186	2.14377	2.80058	2.38673
2810408I11Rik	1.49967	0.847221	0.58358	1.78372
2810408M09Rik	8.83937	10.5846	8.04912	8.30303
2810410L24Rik	1.69185	3.7238	1.61709	2.25428
2810417H13Rik	2.45453	0.623093	0.795507	2.839
2810428I15Rik	75.4145	120.837	85.4319	69.2663
2810429I04Rik	0.44162	0	0	0.0798093
2810433D01Rik	0.342324	1.29659	1.49196	2.01977
2810442I21Rik	0.4462	0	0.172674	0.415755
2810442N19Rik	0.119458	0	0.0692982	0.379399
2810454H06Rik	0.313549	0.726899	0.757306	0.559424
2810459M11Rik	2.86824	0.766961	0.92093	3.94343
2810468N07Rik	6.19463	6.35109	4.07086	5.35003
2810471M01Rik	0	0	0	0
2810474O19Rik	8.85248	7.17325	10.3665	10.6757
2900005J15Rik	1.32157	2.88394	2.0072	2.70266
2900008C10Rik	1.19015	1.17369	1.02949	0.987033
2900009J06Rik	1.27513	2.66405	2.27842	1.29286
2900011O08Rik	0.281223	0.0438374	0.4152	0.695983
2900026A02Rik	8.31274	10.3609	11.2948	9.82747
2900041M22Rik	1.05577	1.19007	0.869934	1.05366
2900052N01Rik	0.0726289	0	0.0625195	0.012571
2900055J20Rik	0	0	0	0
2900056M20Rik	2.03063	3.20754	3.36327	2.65116
2900057B20Rik	0.0527032	0	0	0.111226
2900060B14Rik	0	0	0	0
2900076A07Rik	5.31259	9.89459	8.30715	7.75172
2900079G21Rik	0.315837	0	0	0.333264
2900092C05Rik	0	0	0	0
2900092D14Rik	0	0	0	0
2900097C17Rik	11.202	10.0705	8.19349	5.98004
3000002C10Rik	0.119989	0.303068	0.323162	0.30768
3010001F23Rik	0.12604	0.239586	0	0.178187
3010026O09Rik	4.99376	5.79094	5.50803	4.43342
3010033K07Rik	7.1132	10.5017	16.5148	5.02535
3100003L05Rik	0	0	0	0.131779
3110001I22Rik	2.17619	1.50576	1.76256	3.13368
3110002H16Rik	15.853	19.5141	17.9592	15.0481
3110007F17Rik	0.17894	0.0755494	0.276807	0.336768
3110009E18Rik	6.8873	9.13591	7.18041	6.54874
3110009F21Rik	0	0	0	0
3110015C05Rik	0	0	0	0
3110021A11Rik	0.0686976	0.522787	0.239674	1.07117
3110021N24Rik	0.804529	0.503431	1.2648	1.71497
3110035E14Rik	0.072542	0.164281	0.0499087	0.0300841
3110039I08Rik	0.0809866	0.102907	0.377947	0.173196
3110039M20Rik	0	0.0831478	0	0
3110040N11Rik	13.0584	20.5268	19.0416	13.3985
3110043O21Rik	32.8859	34.5544	30.9955	26.8561
3110045C21Rik	0.690857	0.465747	0.532459	0.904402
3110052M02Rik	2.38354	2.8661	4.22052	3.36777
3110056K07Rik	6.17097	9.89985	9.14718	11.0556
3110057O12Rik	2.11582	2.99666	3.05778	3.38865
3110062M04Rik	3.09766	4.22012	3.43457	3.15931
3110070M22Rik	1.10222	0.997159	0.165322	0.650933
3110079O15Rik	0.963415	0.825909	12.6279	0.475679
3110082I17Rik	8.42093	9.71863	7.96947	10.744
3110082J24Rik	0	0	0	0
3110099E03Rik	0	0	0	0
3200001D21Rik	0.0207788	0	0.0715948	0.0144034
3300002I08Rik	1.33244	2.42383	1.00309	1.16114
3300005D01Rik	0.44679	0	0	0.10584
3425401B19Rik	4.65812	0.0306009	6.79102	5.53126
3632451O06Rik	2.54994	1.4763	1.67746	1.7645
3632454L22Rik	0.103302	0.160947	0.0293879	0.0696668
3830403N18Rik	0.419591	0.66361	0.364418	0.18446
3830406C13Rik	11.871	15.0557	11.9393	12.948
3830408C21Rik	0.432926	0.513472	0.64425	1.02606
3830417A13Rik	0.536696	0.45118	1.373	0.20754
3930402G23Rik	0.261854	0.267749	0.244077	0.203787
4430402I18Rik	2.83471	3.79157	2.8741	3.02622
4631405J19Rik	0.0836086	0.158427	0.0965515	0.0877795
4632415L05Rik	4.64243	3.69217	3.97307	5.50529
4632427E13Rik	1.18287	1.62108	1.38369	1.10789
4632428C04Rik	0.427499	0.636104	0.713921	0.403839
4632428N05Rik	32.1442	27.7657	20.8322	13.5099
4632434I11Rik	0.680419	0.151042	0.229405	1.33641
4732416N19Rik	0	0	0	0
4732456N10Rik	0	0.0233555	0.0212957	0.012847
4732471J01Rik	1.80174	1.57692	2.17899	1.05509
4732490B19Rik	0.0771065	0.218427	0.464752	0.160235
4732491K20Rik	0.568294	0.714994	0.785323	0.54389
4831440E17Rik	1.19177	1.7785	1.32047	1.19613
4833403I15Rik	1.2776	0.162541	0.279816	0.575438
4833411C07Rik	0.731065	0.978014	0.347736	0.632439
4833412C05Rik	0.389945	0.308191	0.225562	0.342264
4833417C18Rik	0.693756	0.535308	0.266824	0.592587
4833418N02Rik	0.746741	0.901049	1.12206	0.950317
4833419F23Rik	0.882277	1.35765	0.804974	0.80184
4833420G17Rik	13.6261	17.5202	6.8253	18.6918
4833422C13Rik	0.12992	0.762413	0.692301	0.379794
4833423E24Rik	0	0	0	0.0202471
4833424O15Rik	0.0112811	0	0.0129248	0
4833427F10Rik	0	0.128161	0.0390188	0
4833427G06Rik	0	0	0	0
4833428L15Rik	0	0	0	0
4833439L19Rik	46.7097	59.2649	54.0424	42.5938
4921501E09Rik	0	0	0	0
4921504A21Rik	0.18527	0.145874	0.159692	0.257136
4921504E06Rik	0	0	0	0
4921506M07Rik	0.540046	0.766568	1.90593	1.05915
4921507L20Rik	0.0959672	0.121053	0.184235	0.423484
4921507P07Rik	1.05478	1.17494	1.1647	0.773158
4921508D12Rik	0	0	0	0
4921509C19Rik	0	0	0	0
4921509O07Rik	0	0	0	0
4921511C10Rik	0.13671	0	0.0393902	0
4921511C20Rik	0	0	0	0
4921511H03Rik	0	0	0	0
4921511I17Rik	0.0756089	0	0.0872227	0
4921511M17Rik	0	0	0	0
4921513I03Rik	0	0.118769	0.072299	0.153048
4921515E04Rik	0	0	0	0
4921517D22Rik	0	0	0	0
4921524J17Rik	6.34753	7.65424	7.51469	7.07295
4921524L21Rik	0	0	0	0
4921525O09Rik	0	0	0.0808777	0.00974956
4921529L05Rik	0	0	0	0
4921530L21Rik	0	0	0	0
4921531C22Rik	3.8297	4.1229	5.83273	3.98156
4921531P14Rik	0	0	0	0
4921533I20Rik	0.107492	0	0.0622596	0.0378273
4921534H16Rik	0	0	0	0
4921536K21Rik	0.465668	0.315628	0.71943	0.309967
4921539E11Rik	0	0.0252771	0.0230513	0
4922502D21Rik	0	0	0	0
4922502H24Rik	0	0	0	0
4922502N22Rik	0	0	0	0
4930401C15Rik	0	0	0	0
4930401O10Rik	0	0	0	0
4930401O12Rik	0	0	0	0
4930402F06Rik	0	0	0	0
4930402F11Rik	0	0	0	0
4930402H24Rik	16.7378	14.0851	24.4358	18.3844
4930402K13Rik	0	0	0	0
4930404A05Rik	0	0	0	0
4930404A10Rik	0	0	0	0
4930404H11Rik	0	0.191712	0.351835	0.161045
4930404I05Rik	0.386744	1.049	0.896362	1.12846
4930404N11Rik	8.62928	9.21786	5.34337	5.48852
4930405A10Rik	0	0	0	0
4930405A21Rik	0.324482	0.13703	0.187957	0.152274
4930405D11Rik	0	0	0	0
4930405J17Rik	0	0	0.11642	0
4930405L22Rik	0	0	0	0
4930406D18Rik	0	0	0	0
4930407I10Rik	0	0	0	0.00668829
4930412B13Rik	0	0	0	0
4930412C18Rik	1.49566	1.12854	2.79462	1.07207
4930412D23Rik	0	0	0	0
4930412O13Rik	1.25383	5.41201	4.12426	5.11778
4930413E15Rik	0	0	0	0
4930413F20Rik	0.288256	0.417724	0.16671	0.165432
4930413G21Rik	5.85164	8.473	5.54672	5.0117
4930413M19Rik	0	0	0	0
4930414L22Rik	2.69576	5.40848	3.88921	3.28176
4930414N06Rik	0	0	0	0
4930415F15Rik	0	0.294819	0.180391	0.165206
4930415L06Rik	0	0	0	0
4930415O20Rik	0.232007	0.889056	0.819582	0.336325
4930417O13Rik	0.144607	0	0.0557572	0
4930417O22Rik	0	0	0	0
4930419G24Rik	0	0	0	0
4930423M02Rik	0	0	0	0
4930425K10Rik	0	0	0	0
4930425O10Rik	0	0	0	0
4930426D05Rik	0	0	0.0350027	0.0634986
4930426L09Rik	0.100711	0.169423	0.154737	0.28089
4930427A07Rik	1.44249	0.535747	0.692985	2.08828
4930428D18Rik	0	0	0	0
4930428E07Rik	0	0	0	0
4930428G15Rik	0	0	0	0
4930428O21Rik	0	0	0.064587	0
4930429B21Rik	0.201648	0.0934189	0.371981	0.394727
4930429D17Rik	0	0	0	0
4930429F11Rik	0	0	0	0
4930429F24Rik	2.42064	1.19673	2.90183	2.05195
4930430A15Rik	0	0	0	0
4930430D24Rik	0	0	0	0
4930430F08Rik	4.22337	4.94484	4.47667	4.87253
4930430F21Rik	0	0	0	0
4930430J02Rik	0	0	0	0
4930431F12Rik	0	0	0.0241083	0.0582034
4930431P03Rik	0.561297	1.15189	0.644663	1.03754
4930432J09Rik	0.0443393	0.0743823	0.0169486	0.071518
4930432K21Rik	0.245381	0.427724	0.380962	0.219238
4930432M17Rik	0	0	0	0
4930433B08Rik	0	0	0	0
4930433I11Rik	0	0	0	0
4930433N12Rik	0	0	0	0
4930434J06Rik	0	0	0	0
4930435E12Rik	0	0	0	0
4930438E09Rik	0	0	0.0865782	0
4930440C22Rik	0	0	0	0
4930440I19Rik	0	0	0	0
4930441J16Rik	0	0	0	0
4930442J19Rik	0	0	0	0
4930442L01Rik	0	0	0	0
4930443O20Rik	0.173618	0.26291	0	0.145347
4930444F02Rik	0	0	0	0
4930444G20Rik	0	0	0	0
4930444M15Rik	0	0	0.0682257	0
4930444P10Rik	0	0.105087	0.193014	0.294935
4930447A16Rik	0	0	0	0
4930447C04Rik	0.151731	0.127468	0.290783	0.0175657
4930447J18Rik	0	0	0	0
4930447K03Rik	0.103277	0	0	0.145234
4930447N08Rik	0.0450545	0	0	0
4930448C13Rik	0	0	0	0
4930448F12Rik	0	0	0	0
4930448H16Rik	0	0	0	0
4930448I06Rik	0	0	0	0
4930448I18Rik	0	0	0	0
4930448K20Rik	0	0	0	0
4930449E01Rik	0	0	0	0
4930449E18Rik	0	0.282289	0.790081	0
4930449I24Rik	0	0	0	0
4930451C15Rik	0.380133	0.295197	0.440701	0.217155
4930451G09Rik	0.852681	0.854138	1.01005	1.8483
4930451I11Rik	0	0	0	0
4930452A19Rik	0	0	0	0
4930452B06Rik	0.169797	0.256446	0.155859	0.152743
4930452G13Rik	0	0	0	0.0343446
4930452N14Rik	0	0.131406	0	0
4930453H23Rik	0	0	0.0327407	0
4930453L07Rik	0	0	0	0.0243034
4930453N24Rik	19.2969	24.6041	25.1227	15.9083
4930455B14Rik	0	0	0	0
4930455C13Rik	0.0614412	0.0735173	0.142204	0.468031
4930455D15Rik	0	0	0	0
4930455F16Rik	0	0	0	0
4930455H04Rik	0	0.0959192	0	0.0269079
4930455J16Rik	0	0	0	0
4930456L15Rik	0	0	0	0
4930459C07Rik	0	0.21626	0.0988585	0.0599299
4930459L07Rik	0	0	0	0
4930461G14Rik	0.0738325	0	0	0
4930463O16Rik	0	0	0	0
4930465K10Rik	0	0	0	0.141984
4930465M20Rik	0	0	0	0
4930467D21Rik	0	0	0	0
4930467E23Rik	0	0	0	0
4930467K11Rik	0	0	0	0
4930468A15Rik	0	0	0	0
4930469G21Rik	0	0	0	0
4930470H14Rik	0	0	0.03242	0
4930470P17Rik	0	0	0	0
4930471C04Rik	0	0	0	0
4930471G03Rik	0	0	0	0.0651702
4930471M09Rik	0.0944154	0	0	0.0331247
4930473A02Rik	0	0.0916689	0.0830288	0
4930473O22Rik	0	0	0	0.0237995
4930474G06Rik	0	0	0	0
4930474H20Rik	0	0	0	0
4930474M22Rik	0	0	0	0
4930474N05Rik	0	0	0	0
4930474N09Rik	0	0	0	0
4930478L05Rik	0	0	0.0295983	0.0357628
4930478P22Rik	0	0	0	0
4930479D17Rik	0	0	0.184754	0.112844
4930480E11Rik	0	0	0	0
4930480G23Rik	0.244248	0.154247	0.140989	0.14239
4930480K15Rik	0	0	0	0
4930480M12Rik	0	0	0	0
4930481A15Rik	0.680793	3.16815	2.41875	0.0841492
4930482G09Rik	0	0	0	0.0483737
4930483J18Rik	0	0.121763	0.111389	0.0676
4930483K19Rik	0.0418734	0.052649	0.195195	0.290887
4930483O08Rik	0	0.131127	0	0.0364415
4930486F22Rik	0	0	0.137734	0
4930486I03Rik	0	0	0.0850944	0
4930486L24Rik	2.20684	2.32141	2.41789	3.28754
4930487D11Rik	0	0	0	0
4930487H11Rik	0.123586	0	0.0717	0.305444
4930488B22Rik	0	0	0	0
4930488L21Rik	0	0	0	0
4930500F04Rik	0	0	0	0
4930500J02Rik	0.0624763	0.158352	0.290152	0.485664
4930500L23Rik	0	0	0	0
4930502A04Rik	0.0645166	0	0	0
4930502E09Rik	0	0	0	0
4930502E18Rik	0	0.05428	0.0496269	0.0902573
4930503B20Rik	0	0	0.000229037	0.0693005
4930503E14Rik	0	0	0	0
4930503E24Rik	2.70292	3.74901	1.88856	2.39397
4930503H13Rik	0	0	0	0
4930503L19Rik	3.18776	2.76308	3.30453	5.07919
4930503O07Rik	0	0	0	0
4930504O13Rik	0	0	0	0
4930505A04Rik	0	0	0.274891	0
4930505G20Rik	0	0	0	0
4930506C21Rik	0.499145	0.421219	1.15694	0.82037
4930506M07Rik	7.15123	4.42613	5.28704	8.01989
4930507D05Rik	0.223818	0.138207	0.388045	0.26224
4930507D10Rik	0	0	0	0
4930509E16Rik	0.173908	0	0	0.0304542
4930509J09Rik	0	0	0	0
4930509K18Rik	0	0	0	0
4930511A02Rik	0	0	0	0
4930511E03Rik	0.191683	0.429165	0.269111	0.118135
4930511M06Rik	0.0353373	0.124934	0.0811097	0.0115004
4930512B01Rik	0	0	0.0408564	0.0247612
4930513D17Rik	0	0	0	0
4930513N10Rik	0.316192	0.146981	0.13365	0.345661
4930513O06Rik	0	0	0	0
4930515B02Rik	0	0	0	0
4930515G01Rik	0.533199	0.155419	0.0473549	0.88961
4930515G16Rik	0	0	0	0
4930515L03Rik	0	0	0	0
4930515L19Rik	0	0	0	0
4930517E11Rik	0	0	0	0
4930518P08Rik	0	0	0	0
4930519D14Rik	0	0	0	0
4930519F09Rik	0.22475	0.405008	0.443811	0.805398
4930519F16Rik	0	0	0	0
4930519F24Rik	0	0	0	0
4930519G04Rik	0	0	0	0
4930519H02Rik	0	0	0	0
4930520O04Rik	0.963513	0.803271	1.28225	2.0234
4930520P13Rik	0	0	0	0
4930521E06Rik	0.121631	0	0.211736	0.171776
4930522H14Rik	0	0	0	0.0460409
4930522O17Rik	0	0	0	0
4930523C07Rik	13.5527	10.3648	6.84899	8.68583
4930523O13Rik	0	0	0	0
4930524B15Rik	0	0	0.0282671	0
4930524C18Rik	0	0	0	0
4930524N10Rik	0	0	0	0
4930524O05Rik	0	0	0	0
4930524O08Rik	0	0	0	0
4930525D18Rik	0.0583652	0	0	0.164668
4930525G20Rik	0.186556	0.176061	0.46361	0.225761
4930525M21Rik	0	0	0	0
4930526I15Rik	7.23741	8.5181	6.96925	5.05198
4930526L06Rik	0	0.066361	0	0
4930527F14Rik	0	0	0.18684	0
4930527G23Rik	0	0	0	0
4930528A17Rik	0.339096	0.513437	0.469605	0.344798
4930528D03Rik	0	0	0	0
4930528P14Rik	0	0	0	0
4930529C04Rik	0	0	0	0.00898896
4930529K09Rik	0	0	0	0
4930529L06Rik	0	0	0	0
4930529M08Rik	0.0317321	0	0	0.022107
4930532M18Rik	0	0	0	0
4930533B01Rik	0	0	0	0
4930533P14Rik	0	0	0	0
4930538K18Rik	0.0993302	0.375948	0.419643	0.184653
4930539C22Rik	0	0	0	0
4930539E08Rik	0.0888463	0.136526	0.0904487	0.0476619
4930539J05Rik	2.11894	3.07912	2.17698	1.34735
4930539M17Rik	0	0	0	0.0468547
4930539N22Rik	0	0	0	0
4930540M03Rik	0	0	0	0
4930542C21Rik	0	0	0.0660706	0
4930542D17Rik	0	0	0.0428215	0
4930543E12Rik	0	0	0	0
4930544D05Rik	0	0	0	0
4930544G11Rik	0	0	0	0
4930544M13Rik	0	0	0.0410512	0
4930545E07Rik	0	0	0	0
4930545H06Rik	0	0	0	0
4930545L23Rik	0.0188095	0.0473596	0.0215921	0
4930546C10Rik	0.0203985	0	0	0
4930546K05Rik	0.0129829	0.0816521	0.0148811	0.0448368
4930547E08Rik	0	0	0	0
4930547E14Rik	0	0	0	0
4930548G14Rik	0	0	0	0.0306418
4930548H24Rik	0	0	0.0810967	0.0245433
4930548J01Rik	0	0	0.0939504	0
4930548K13Rik	0	0	0	0
4930549C01Rik	0	0	0	0
4930549G23Rik	0	0	0	0
4930550C14Rik	0.332515	0.577546	1.1039	0.494508
4930550L24Rik	0	0	0	0
4930552N02Rik	0	0	0	0
4930552P12Rik	0.0942921	0	0.0649456	0.143668
4930553E22Rik	0	0	0	0
4930554C24Rik	0	0	0	0
4930555B11Rik	0	0	0	0
4930555G01Rik	0	0	0	0.0160971
4930556C24Rik	0	0	0	0
4930556G01Rik	0	0	0	0
4930556J02Rik	0	0	0	0
4930556M19Rik	0.552386	0.622988	0.35889	0.866976
4930556N09Rik	0	0	0	0
4930557A04Rik	0	0	0	0
4930557J02Rik	0	0	0	0
4930558C23Rik	0	0	0	0
4930558G05Rik	0	0	0	0
4930558J18Rik	0.046717	0.0588533	0	0.0810536
4930558K02Rik	0	0	0	0
4930562C15Rik	0.0358436	0	0.0273822	0.0989827
4930562F07Rik	0.134705	0.403995	0.489982	0.159909
4930563D23Rik	0.0174711	0	0.0200488	0
4930563E18Rik	0.0638371	0	0.0735303	0.0222388
4930563E22Rik	0.183414	0.388214	0.56621	0.722459
4930563F08Rik	0	0	0	0
4930563M20Rik	0	0	0	0
4930564B18Rik	0	0	0	0
4930564C03Rik	0	0	0	0
4930564D02Rik	0	0	0	0
4930565D16Rik	0	0	0	0
4930565N06Rik	0.644707	0.0491958	1.09912	1.21811
4930567H12Rik	0.0569131	0	0.0659828	0.0401155
4930567H17Rik	0	0	0	0
4930567J20Rik	0	0	0	0
4930567K20Rik	0	0	0	0
4930568D16Rik	0	0	0	0
4930568E12Rik	0	0	0	0
4930568G15Rik	0	0	0	0
4930570G19Rik	1.21959	2.53956	1.75334	1.272
4930571K23Rik	0	0	0	0
4930571O06Rik	0	0	0	0
4930572K03Rik	0	0	0	0
4930572O03Rik	0	0	0	0
4930572O13Rik	0	0	0.173762	0
4930573O16Rik	0	0	0	0
4930577N17Rik	1.02417	1.65209	1.13526	1.55035
4930578C19Rik	1.75724	0.920057	2.3014	2.29281
4930578E11Rik	0	0	0	0
4930578I06Rik	0	0	0	0
4930578M01Rik	0.303651	0.923211	0.352393	0.471706
4930578N18Rik	0	0	0	0
4930579F01Rik	0	0.0389636	0	0
4930579G18Rik	0.37717	0.432768	0.713025	0.552022
4930579G24Rik	2.15152	2.34123	2.10803	2.58037
4930579K19Rik	0.361937	0.743355	0.522925	0.507464
4930581F22Rik	1.12077	1.48535	1.2191	1.56653
4930583K01Rik	0.188513	0.637031	0.218893	0.0444141
4930583P06Rik	0	0	0.0936143	0
4930584F24Rik	0	0	0	0.0305477
4930590J08Rik	0.0542657	0	0	0
4930590L20Rik	0	0	0	0
4930591A17Rik	0	0	0	0
4930592A05Rik	0	0	0	0
4930592I03Rik	0	0	0	0
4930593A02Rik	0.0582089	0	0.067508	0
4930593C16Rik	0	0	0	0
4930594C11Rik	0.135626	0.298719	0.272326	0.164234
4930595M18Rik	0	0	0	0
4930596D02Rik	0	0	0	0
4930596I21Rik	0	0	0	0
4930597G03Rik	0	0	0	0
4930598F16Rik	0	0	0	0
4930599N23Rik	0.583689	0.250637	0.295623	0.521917
4931402G19Rik	0.0639909	0.0542792	0.0748905	0.205185
4931403E22Rik	0.182362	0.232075	0.106666	0.130626
4931403G20Rik	0.0287023	0	0.0603195	0.019961
4931406B18Rik	0	0	0	0
4931406C07Rik	80.3858	103.51	119.231	61.068
4931406H21Rik	0.225214	0.0596287	0.21732	0.0163659
4931406P16Rik	17.8982	14.5108	16.2446	13.4099
4931408C20Rik	0.230978	0.0132012	0	0.123139
4931408D14Rik	9.66953	12.6816	18.2501	7.35608
4931409K22Rik	0	0.0220699	0	0
4931412M21	0	0	0.0680617	0.0136898
4931414P19Rik	2.74174	3.77132	2.85506	3.1679
4931417E11Rik	0	0	0	0
4931419H13Rik	0	0	0	0.0391678
4931420L22Rik	0	0	0	0
4931423N10Rik	0	0.033185	0	0
4931428F04Rik	0.973727	1.67546	0.995644	2.62646
4931428L18Rik	0	0	0	0
4931429I11Rik	0	0.0190102	0	0.0104457
4931429L15Rik	0	0	0	0
4931429P17Rik	0.0716151	0	0	0.0662831
4931430N09Rik	0	0	0.0253051	0
4931431B13Rik	0.548552	0	0	0
4931431C16Rik	0.0343097	0.0215052	0.0787947	0.118648
4931431F19Rik	0	0	0	0
4931440F15Rik	0.0282993	0.0177372	0.048495	0
4931440J10Rik	0	0	0	0
4931440L10Rik	0	0	0	0.0239508
4931440P22Rik	0.392557	0.821136	0.420567	0.457147
4932411E22Rik	0.12299	0.0442308	0.120977	0.0364836
4932411N23Rik	0	0	0	0
4932412D23Rik	0	0	0	0
4932413F04Rik	0	0	0	0
4932414J04Rik	0	0	0.0173695	0
4932414N04Rik	0.0125917	0	0	0
4932415M13Rik	0	0	0	0
4932416H05Rik	1.72099	1.72359	1.89731	1.82824
4932416K20Rik	0	0	0	0
4932418E24Rik	0.058819	0	0.134898	0.569221
4932429P05Rik	0	0	0	0
4932435O22Rik	0.0406158	0	0	0.0187047
4932438A13Rik	4.23497	3.38474	5.42085	5.76404
4932438H23Rik	0.174362	0	0.0889188	0.0938886
4932441J04Rik	0.487737	0.413185	0.284543	0.347736
4932443I19Rik	0	0	0.17166	0
4932702P03Rik	0	0	0	0
4933400A11Rik	0	0	0	0
4933400B14Rik	0	0	0	0
4933400C23Rik	0	0	0	0
4933400F21Rik	0.025419	0.0159859	0.0437002	0.00877745
4933400L20Rik	0	0	0	0
4933401B06Rik	0	0	0	0
4933401D09Rik	0	0	0	0
4933401H06Rik	0	0	0	0
4933402C06Rik	0	0	0	0
4933402D24Rik	0	0.10505	0.159804	0.270433
4933402E13Rik	0	0	0	0
4933402J07Rik	0	0	0	0
4933402J10Rik	0	0	0	0
4933402J15Rik	0	0	0	0
4933402N03Rik	0	0	0	0
4933402N22Rik	0	0	0	0
4933402P03Rik	0	0	0	0
4933403O08Rik	0	0	0	0
4933404G15Rik	0	0	0	0
4933404K08Rik	0	0	0	0
4933404O12Rik	1.48376	1.43199	1.64734	2.37381
4933405D12Rik	0.0753689	0.765504	0.263409	0.267927
4933405E24Rik	0	0	0	0
4933405L10Rik	0	0.117819	0	0
4933405O20Rik	0	0	0	0
4933406C10Rik	0.422063	0.91242	0.902435	0.188888
4933406D12Rik	0	0	0	0
4933406F09Rik	0	0	0	0
4933406G16Rik	0	0	0	0
4933406I18Rik	0.670845	1.15892	0.3539	0.473749
4933406J08Rik	0	0	0	0
4933406J10Rik	0	0	0.0634531	0
4933406K04Rik	0	0	0	0
4933406M09Rik	0	0	0	0.0191432
4933407E24Rik	0.0258448	0	0	0
4933407G14Rik	0.0405939	0	0	0
4933407I05Rik	0	0	0	0
4933407K13Rik	0.5186	0.412031	0.578881	0.707189
4933407L21Rik	0.136294	0	0	0.0637038
4933408B17Rik	0.320362	0.226905	0.206927	0.44398
4933408J17Rik	0	0	0.0299735	0.0181093
4933408N05Rik	0	0.0394182	0	0.0217683
4933409G03Rik	0	0	0	0
4933409K07Rik	0.00996918	0	0	0
4933411E08Rik	0	0.0724509	0.0330678	0.0199895
4933411G06Rik	0	0	0	0
4933411G11Rik	0	0	0	0
4933411K16Rik	0.179647	0.0453478	0.20714	0.351114
4933411K20Rik	5.89977	5.87869	6.63082	6.60952
4933412E12Rik	2.40421	3.84147	4.45093	2.51193
4933412E24Rik	0	0	0	0
4933412O06Rik	0	0	0	0
4933413G19Rik	0.048256	0	0	0.0677535
4933413J09Rik	0.0816024	0.0855437	0.155914	0.131551
4933413L06Rik	0	0	0	0
4933415F23Rik	0.0273578	0	0.0314746	0
4933416C03Rik	0	0	0	0
4933416E03Rik	0	0	0	0
4933416I08Rik	0.000289713	0	0	0
4933416M06Rik	0.0794804	0	0.0458675	0
4933416M07Rik	0	0	0.0517381	0.0323126
4933417A18Rik	0.0512173	0.0644789	0	0.0720616
4933417D19Rik	0.335079	0.423292	0.483698	0.32249
4933417E11Rik	0.19281	0	0.167272	0.60909
4933417G07Rik	0.451755	0.428946	0.261844	0.159178
4933417O13Rik	0.0651286	0	0.0375152	0
4933421I07Rik	0	0	0	0
4933421O10Rik	1.79377	2.76387	3.15805	2.50129
4933422A05Rik	0	0	0	0.0521306
4933422H20Rik	0	0.44048	0.229667	0.0693644
4933424G05Rik	0.0279741	0	0	0
4933424G06Rik	0	0.117439	0.16112	0.162911
4933425B07Rik	0	0	0.0288083	0
4933425L06Rik	0.0221108	0	0	0
4933426M11Rik	18.5389	19.1827	21.1865	18.2194
4933427D06Rik	0	0	0	0
4933427D14Rik	2.77106	3.3391	3.36656	4.25814
4933427E11Rik	0	0	0.0490872	0.0297558
4933427E13Rik	0	0	0	0
4933427G17Rik	0.411073	0.453287	0.354546	0.196343
4933427I22Rik	0	0	0.0844772	0.127869
4933428C19Rik	0	0	0	0
4933428G20Rik	0.108527	0.0916488	0.0427565	0.175691
4933429K18Rik	0	0	0	0
4933429O19Rik	0	0	0	0
4933430H16Rik	0	0	0	0
4933430I17Rik	0.0546125	0.0688403	0.125659	0.0949242
4933430M04Rik	0	0	0	0
4933430N04Rik	0	0	0	0
4933431E20Rik	2.30976	2.29307	2.51915	3.97529
4933431G14Rik	0.0808855	0	0.046699	0.0613659
4933432G23Rik	0	0	0	0
4933432I03Rik	0	0	0	0
4933432I09Rik	0.222375	0.0935699	0.12824	0.0517661
4933432K03Rik	0	0	0	0
4933433C11Rik	0	0	0	0
4933433F19Rik	0	0	0	0
4933433G08Rik	0	0	0	0
4933433G15Rik	0.18078	0.0571213	0.104475	0.158414
4933433G19Rik	0.300517	0.380183	0.347014	0
4933433H22Rik	0.0544074	0	0.0625921	0
4933434E20Rik	12.8281	18.1077	14.6359	13.5793
4933434I20Rik	0	0	0.0455728	0
4933436E23Rik	0	0	0	0
4933436H12Rik	0	0	0	0
4933436I01Rik	0	0	0	0
4933438B17Rik	0	0	0	0
4933438K21Rik	0	0	0	0
4933439C10Rik	2.24763	6.86958	3.18692	4.65094
4933439K11Rik	0.521783	0	0.201701	0.449734
4933440J02Rik	0	0	0	0
4933440M02Rik	0	0	0	0.0407367
5031410I06Rik	0	0	0	0
5031414D18Rik	0.848161	0.756214	0.648899	0.648243
5031425E22Rik	7.45702	10.0612	7.945	8.00091
5031425F14Rik	0.300848	0.151753	0	0.167547
5031426D15Rik	0.0596429	0.140552	0.264622	0.0154304
5031434C07Rik	0.0226533	0	0	0
5031434O11Rik	1.15534	4.40516	1.83008	1.4129
5031439G07Rik	21.2703	10.8016	17.4361	21.1335
5033403H07Rik	0	0	0	0
5033404E19Rik	0	0	0	0
5033406O09Rik	0.141326	0.748314	0.650524	0.235923
5133400J02Rik	0	0	0	0
5330411J11Rik	0	0	0	0
5330413P13Rik	0	0	0	0
5330417C22Rik	1.27559	3.6629	4.06935	0.670638
5330426P16Rik	3.34601	2.05808	2.92519	5.5074
5330434G04Rik	0	0	0	0
5330439B14Rik	0	0	0	0.10173
5430401F13Rik	0	0	0	0
5430402E10Rik	0	0	0	0
5430402O13Rik	2.17569	1.91135	0.673244	1.02352
5430403N17Rik	0.0184033	0	0.0211236	0.114685
5430405H02Rik	1.35824	0.856736	1.41284	1.2558
5430416N02Rik	8.89923	9.17405	5.86225	7.83969
5430416O09Rik	3.68262	5.0519	3.93779	2.16412
5430417L22Rik	12.3932	20.6896	17.7231	9.68466
5430419D17Rik	0.254104	0	0.218606	0.175744
5430421F17Rik	0.0413206	0.520341	0.545746	0.143204
5430421N21Rik	0.0832791	0	0.0638806	0.0193041
5430425K12Rik	0.695946	0.620497	0.850765	0.887902
5430427M07Rik	0	0	0	0
5430427O19Rik	0.560625	0.375036	0.396386	0.535269
5430428K19Rik	0.0609859	0	0	0
5430434I15Rik	0	0	0	0
5430435G22Rik	25.7233	8.42428	8.45168	22.6022
5430437J10Rik	0.40133	0.225417	0.206131	0.250012
5430440P10Rik	0.0527032	0	0.12207	0.111226
5530400C23Rik	0	0	0	0
5530401A14Rik	0	0	0	0
5530601H04Rik	1.27662	1.80632	2.0257	3.14452
5730403I07Rik	0	0	0	0.0327956
5730405O15Rik	0.249905	0.475	0.435228	0.441512
5730408K05Rik	7.6685	10.544	8.20531	14.8365
5730409E04Rik	13.5266	14.148	15.3305	14.7186
5730412P04Rik	0	0	0	0
5730416F02Rik	0.210078	0.177667	0.244393	0.0496617
5730420D15Rik	0.224789	0.113648	0.155892	0
5730422E09Rik	0.0285249	0.0359628	0	0.0198432
5730435O14Rik	0.204211	0.130152	0.239581	0.0735183
5730455P16Rik	7.5027	7.32005	10.896	8.39749
5730457N03Rik	0	0	0	0
5730460C07Rik	0.0529169	0	0.0608657	0.0551647
5730480H06Rik	0.90097	1.58969	1.16636	1.1358
5730488B01Rik	0.0205043	0	0	0
5730507C01Rik	0.0762881	0.144074	0.0218903	0.0792599
5730508B09Rik	10.6219	28.5006	16.3791	10.9558
5730522E02Rik	0.0654227	0.0825331	0.150744	0.0227995
5730559C18Rik	2.27966	2.24827	2.03161	2.21536
5830403L16Rik	0.059429	0.0374692	0.0684137	0.0206821
5830411N06Rik	0.139716	0.0390673	0.0368535	0.0322041
5830415F09Rik	3.43459	4.45262	3.99262	3.63362
5830416I19Rik	0.0178222	0	0	0
5830416P10Rik	0.00852091	0.107109	0.0487775	0.13509
5830417I10Rik	1.02777	0.787148	1.03627	0.818802
5830418K08Rik	2.58485	1.48963	2.86032	4.03463
5830418P13Rik	0.055785	0	0	0.0151723
5830428M24Rik	0.362269	0.851231	0.479359	0.436689
5830432E09Rik	0.609785	0.210471	0.309628	0.282737
5830444B04Rik	0.0907606	0.336808	0.439365	0.0197287
5830454E08Rik	1.57569	3.40257	2.11288	2.13194
5830473C10Rik	0	0	0	0
5930403L14Rik	1.35481	1.88211	1.1881	1.29396
5930412G12Rik	1.39399	1.9282	1.89361	1.56428
5930430L01Rik	3.48702	4.43513	1.8234	6.35771
5930438M14Rik	0.0193367	0.0243455	0.0222003	0.0133948
6030407O03Rik	0.0810027	0	0	0.131389
6030408B16Rik	0.0979067	0.0925213	0.112556	0.271927
6030419C18Rik	5.08784	2.55781	4.99972	7.77056
6030440G07Rik	0	0	0	0
6030443J06Rik	0.094651	0.0793417	0.530057	0.312001
6030458C11Rik	8.31849	7.90668	9.12735	11.4891
6030466F02Rik	0	0	0	0
6030468B19Rik	0	0	0	0.0688476
6030469F06Rik	0.159009	0.240682	0.366295	0.0886249
6030498E09Rik	0	0	0	0
6230400D17Rik	0.339299	0.858088	0.728937	1.39528
6330403A02Rik	0.450622	0.240247	0.179709	0.371509
6330403K07Rik	0.61795	0.935227	0.81833	1.248
6330407A03Rik	0.0526286	0.0663297	0.0302659	0
6330408A02Rik	2.75369	2.99646	2.96753	2.58764
6330409D20Rik	0.140706	0.296469	0.271173	0.164528
6330410L21Rik	0.0486677	0	0.150974	0.0597571
6330415B21Rik	0	0	0	0
6330416G13Rik	4.04458	7.98052	9.67665	4.73094
6330418K02Rik	2.05133	3.48515	2.02692	3.20702
6330419J24Rik	0.741351	0.552066	0.138811	0.512559
6330549D23Rik	1.1209	1.07873	1.15357	0.821068
6430411K18Rik	0.210911	0.0488386	0.148531	0.212218
6430503K07Rik	0	0	0	0
6430531B16Rik	0.268933	0.283234	0.207206	0.47124
6430548M08Rik	5.88917	2.54558	4.29235	4.56934
6430550D23Rik	0.413523	0.716564	0.832225	0.77214
6430562O15Rik	0.0883251	0.152504	0.170263	0.30474
6430571L13Rik	3.59016	1.27473	4.94502	2.95759
6430573F11Rik	1.94211	4.225	3.6416	2.66267
6430584L05Rik	0.0146849	0.0554278	0.0505181	0.0812067
6430706D22Rik	9.5616	5.1998	11.6858	15.5669
6430710C18Rik	0	0.0393329	0.0359142	0
6530402F18Rik	3.28309	2.6198	2.79526	3.53095
6530411M01Rik	0.0422924	0	0.0488457	0
6720416L17Rik	0.134459	0.314387	0.0661572	0.133053
6720468P15Rik	0	0.0477269	0.0872214	0.105644
6720483E21Rik	0	0	0.0541164	0.131333
6720489N17Rik	0.72832	0.603722	0.61159	1.09439
6820408C15Rik	0.116359	0.267607	0.279227	0.145798
6820431F20Rik	0.204292	0.171229	0.178259	0.275083
7420426K07Rik	0	0	0	0
7420461P10Rik	0	0	0.184411	0
7420700N18Rik	0	0	0.0319403	0
7420701I03Rik	0	0	0	0
7530416G11Rik	0	0	0	0
7630403G23Rik	0	0	0	0
8030411F24Rik	0	0	0	0
8030423F21Rik	0.0326949	0.0205728	0.0562616	0.0565433
8030423J24Rik	0	0	0	0
8030442B05Rik	0	0	0	0
8030443G20Rik	0	0	0	0
8030462N17Rik	5.09156	2.77882	6.14555	5.89051
8430408G22Rik	22.6461	29.5115	26.0872	7.28573
8430419L09Rik	5.88488	8.89619	5.76253	10.0249
8430422H06Rik	0	0	0	0
8430423G03Rik	0.0970876	0	0.113753	0
8430426J06Rik	2.89505	0.785433	2.72068	6.74379
8430427H17Rik	3.31036	3.07197	3.8804	5.4415
8430429K09Rik	1.86193	2.36549	2.00105	2.12735
8430431K14Rik	0.0489686	0.143793	0.112353	0.0790408
8430436N08Rik	0.14722	0.124118	0.0567774	0.0344636
8430437L04Rik	0	0	0	0
9030025P20Rik	0.157745	0.283857	0.388405	0.125066
9030204H09Rik	0	0	0	0
9030404E10Rik	0.085416	0	0	0
9030612E09Rik	0.259374	0.16344	0.208806	0.180218
9030617O03Rik	8.22699	8.94626	8.07144	9.03807
9030619P08Rik	0.587628	0.165539	1.36553	0.415817
9030624G23Rik	0.125574	0.0263564	0.0240383	0.0145084
9030624J02Rik	15.7769	16.1629	14.5958	14.4872
9030625G05Rik	0	0	0	0
9130008F23Rik	1.81124	2.42044	2.23322	2.71169
9130011E15Rik	5.80105	5.70262	6.08308	5.74641
9130015A21Rik	0	0	0	0.0883104
9130015L21Rik	0	0	0	0
9130019O22Rik	1.24964	1.21575	1.02665	0.944047
9130019P16Rik	0.0419819	0.0134603	0.0242039	0.00724148
9130023H24Rik	2.70656	3.50658	2.66928	3.60723
9130024F11Rik	0.165163	0.104858	0.070419	0.0339418
9130204L05Rik	0	0	0	0
9130209A04Rik	0	0	0	0
9130221F21Rik	0	0.0224244	0	0
9130221H12Rik	7.05403	7.80437	5.74032	5.99817
9130227L01Rik	0	0	0	0
9130230L23Rik	0.172106	0.608085	0.396735	0.696294
9130401M01Rik	23.7422	28.3575	19.8965	23.7507
9130409I23Rik	0	0	0	0
9230009I02Rik	0	0	0	0
9230102K24Rik	0	0	0.0902345	0.191313
9230102O04Rik	0.955809	2.73211	1.88761	1.84651
9230104L09Rik	0.279404	0.118559	0.327024	0.267097
9230105E05Rik	0	0.0531751	0.0242496	0
9230110C19Rik	4.03388	3.757	7.39678	4.71113
9230110F15Rik	0	0	0	0
9230112D13Rik	0	0	0	0
9230112J17Rik	0.02029	0.178875	0.0466062	0.0400229
9230114K14Rik	0.721867	0.880872	1.06275	1.12678
9230116L04Rik	0.218954	0.11812	0.295231	0.215825
9230116N13Rik	0.478945	0.346081	0.419328	0.457183
9330020H09Rik	0.765403	1.21619	0.661908	0.60299
9330102E08Rik	0.85601	1.24103	2.08439	0.812565
9330111N05Rik	0.035752	0.0902457	0.0824433	0.0748612
9330117O12Rik	0	0.0332254	0	0.0916026
9330133O14Rik	2.54527	2.93283	2.52189	2.03531
9330151L19Rik	2.46219	4.36669	3.49883	5.18064
9330158H04Rik	0.014927	0	0	0
9330159F19Rik	4.3999	2.65493	1.52378	3.76265
9330159M07Rik	0.481438	0.324614	1.12802	0.304889
9330162012Rik	1.27608	2.5256	1.81968	2.29348
9330162B11Rik	0	0	0	0
9330175E14Rik	0.290467	0.162849	0.297425	0.787156
9330175M20Rik	0.0184111	0.0231769	0.105663	0.050993
9330178D15Rik	0	0	0	0
9330179D12Rik	0.31263	0.999441	0.763449	0.330874
9330182L06Rik	0.0685886	0.049276	0.0112218	0.0405478
9330182O14Rik	0	0	0	0
9330188P03Rik	0.146393	0.123416	0.112909	0.23986
9430007A20Rik	0	0	0	0
9430008C03Rik	5.10246	5.88294	4.47178	6.80625
9430014N10Rik	0	0	0	0
9430015G10Rik	6.41031	6.06411	7.12146	9.49064
9430016H08Rik	19.6291	28.7527	22.1165	19.8251
9430018G01Rik	0	0	0.025511	0
9430019J16Rik	0	0	0	0
9430020K01Rik	16.1297	12.3689	21.1957	15.631
9430021M05Rik	0.0222125	0	0	0.0308145
9430037G07Rik	0.072785	0.146518	0.46738	0.261608
9430038I01Rik	7.54116	8.76808	6.51259	8.13072
9430041J12Rik	0	0	0.0941474	0.12884
9430060I03Rik	0.0648006	0.0802614	0.15009	0.0666336
9430069I07Rik	0.22835	0	0	0
9430076C15Rik	0.107214	0.0963605	0.175662	0.190626
9430083A17Rik	0.310593	1.28972	0.783726	0.665814
9430091E24Rik	1.29615	1.09627	1.5507	1.39669
9530002B09Rik	0	0	0	0
9530003J23Rik	0	0	0	0
9530026F06Rik	0	0	0	0
9530026P05Rik	3.89379	2.46391	1.62896	2.16991
9530027J09Rik	0.236276	0.263078	0.429597	0.195751
9530036O11Rik	0	0	0	0
9530051G07Rik	0.0926336	0.0905894	0.153261	0.0497032
9530052E02Rik	0.0580676	0.436	0.132214	0.241017
9530053A07Rik	0.314835	0.190727	0.0964775	0.0387018
9530059O14Rik	0.0114777	0	0	0
9530068E07Rik	102.904	101.302	94.0178	98.8573
9530077C05Rik	0.420105	0.334195	0.355648	0.291384
9530080O11Rik	0.068675	0	0.234211	0.164757
9530082P21Rik	12.3335	18.2969	16.1057	12.3075
9530091C08Rik	0.318194	0.0981963	0.293771	0.219038
9630001P10Rik	0.0663632	0	0	0.210717
9630013A20Rik	0	0	0	0
9630028B13Rik	0	0	0	0
9630028H03Rik	0	0.0261042	0	0
9630033F20Rik	6.127	3.5847	8.47538	6.74553
9830107B12Rik	0.479896	0.145056	0	0.55746
9830132P13Rik	0	0.0136743	0	0.0150079
9830147E19Rik	1.04605	1.03159	1.75535	2.13876
9830166K06Rik	0.102118	0.128525	0.234341	0.176659
9930012K11Rik	1.69804	0.916752	1.22492	1.41473
9930014A18Rik	1.41744	0.881026	0.775106	1.02214
9930021J03Rik	4.14948	2.89957	5.46419	5.85784
9930104L06Rik	4.10817	4.931	6.72403	5.32178
9930111H07Rik	0	0	0	0
9930111J21Rik1	0.378884	0.0446605	0.189895	0.253351
9930111J21Rik2	0	0	0.0225635	0.0136148
A130010J15Rik	3.75691	4.18391	3.38765	4.38845
A130077B15Rik	0.110701	0	0.0635329	0.0638777
A1bg	0	0	0	0.0185137
A1cf	0	0	0	0
A230001M10Rik	0	0	0	0
A230009B12Rik	0	0	0.105358	0.0564706
A230020J21Rik	0.111346	0	0.039928	0.0564332
A230028O05Rik	0.167056	0.0840985	0.210832	0.0924665
A230046K03Rik	9.47222	9.30244	11.1232	12.3241
A230050P20Rik	8.25094	10.8291	8.92763	12.0478
A230056J06Rik	0.04401	0	0.0168222	0.0101405
A230056P14Rik	0.331096	0.529495	0.326742	1.01749
A230057D06Rik	0.0479541	0	0.027561	0.0166447
A230065H16Rik	0.560008	0	0.109248	1.74002
A230070E04Rik	0.0261874	3.5195e-05	0	0
A230072C01Rik	2.62305	4.52491	3.61946	3.36059
A230072E10Rik	0.0899979	0.0882271	0.0804062	0.113045
A230073K19Rik	0.05722	0.0463915	0.121835	0.0777283
A230077H06Rik	0.0478192	0	0.0182842	0.0330737
A230103J11Rik	0.442414	0.288397	0.39256	0.745892
A230108P19Rik	0	0	0.0216109	0
A2m	0.00970213	0	0.0222225	0
A330009N23Rik	2.31453	2.21102	1.42841	2.09943
A330021E22Rik	0.0996299	0.26859	0.342701	0.334435
A330023F24Rik	0.79912	1.41944	1.03428	0.886192
A330032B11Rik	0.0509564	0	0.0290791	0
A330033J07Rik	0.182304	0.0208399	0	0.194981
A330035P11Rik	0.862463	0.955267	0.870895	0.787871
A330040F15Rik	0.522691	0.600773	0.769369	0.600242
A330041J22Rik	0.368446	0.630217	0.665849	0.585206
A330048O09Rik	0.456863	0.116285	0.320688	0.261824
A330049N07Rik	0.0483542	0.0609233	0	0.234992
A330050F15Rik	0	0	0.0474335	0
A330069E16Rik	0.248122	1.49333	1.00817	1.00802
A330070K13Rik	0	0	0	0
A330074K22Rik	0.453981	0.0476284	0.521156	0.537134
A330076C08Rik	0	0	0	0
A330076H08Rik	0.0264263	0.0333066	0.121582	0.0367312
A330093E20Rik	0.0222066	0	0.0450451	0.0288043
A330102I10Rik	0	0.250157	0.115071	0.462752
A3galt2	0.149464	0.136741	0.109037	0.15959
A430005L14Rik	22.7849	19.6598	16.2638	20.4073
A430033K04Rik	2.35675	2.31655	2.82078	2.50477
A430035B10Rik	2.09257	2.47984	2.52051	1.45327
A430078G23Rik	0.109608	0.0591107	0.0359203	0.184085
A430088P11Rik	0.0117616	0.0761539	0.104277	0.0823852
A430089I19Rik	0	0	0	0
A430090L17Rik	0	0	0.0284981	0.00858554
A430093F15Rik	0.0903741	0	0	0.047023
A430105I19Rik	3.55409	4.45617	6.9523	3.39834
A430107P09Rik	0.0424921	0	0	0.0147304
A4galt	8.39422	7.94381	8.43502	4.94235
A4gnt	0	0	0	0
A530006G24Rik	0	0	0	0
A530013C23Rik	1.36117	2.27805	1.34017	1.25419
A530016L24Rik	55.5932	117.822	134.946	44.6608
A530032D15Rik	0.0831198	0	0.0318788	0.0192668
A530046M15Rik	0	0.0814246	0	0
A530050N04Rik	0	0	0	0.0747505
A530053G22Rik	0.518783	0.436431	0.677699	0.313646
A530054K11Rik	2.7449	3.15471	3.10285	4.22297
A530058N18Rik	0	0	0	0
A530064D06Rik	0.627263	0.251571	0.614244	0.475919
A530065N20Rik	0	0	0.0140674	0.042379
A530072M11Rik	0.47109	1.22042	0.81272	0.436477
A530088E08Rik	0.0619073	0	0	0.0692086
A530099J19Rik	0.94276	0.593261	0.328366	1.09496
A630001G21Rik	1.34523	1.47535	1.05976	2.0069
A630007B06Rik	5.5289	1.79301	6.20758	9.08334
A630010A05Rik	0	0	0	0
A630012P03Rik	0	0	0	0.0508416
A630019I02Rik	0	0	0	0
A630020A06	0.273703	0.442644	0.567694	0.270076
A630023A22Rik	0.0380453	1.47301	0.175525	0.0531519
A630023P12Rik	0.287411	0.122005	0	0.275098
A630033H20Rik	1.64316	0.701686	0.856203	3.08299
A630066F11Rik	1.39658	1.9132	3.40756	1.07011
A630072M18Rik	2.35029	2.51723	2.25877	2.26479
A630073D07Rik	0	0	0	0
A630075F10Rik	0.0521236	0.0328372	0.0599471	0.0543195
A630076J17Rik	0.091565	0	0.107127	0.0656
A630077J23Rik	0.567644	1.22175	1.25035	0.520103
A630089N07Rik	0.224071	0.225793	0.257459	0.761641
A630095E13Rik	0	0	0	0
A630095N17Rik	0.0951705	0	0.33436	0.1366
A730006G06Rik	0	0	0	0
A730008H23Rik	1.37846	0	1.68992	4.48444
A730017C20Rik	0.214797	0.16921	0.0926527	0.226728
A730017L22Rik	1.61217	2.40586	1.82834	1.88937
A730018C14Rik	0	0	0	0
A730020E08Rik	0.118292	0	0.170213	0.432228
A730020M07Rik	0.761438	0.351178	0.700215	0.310864
A730036I17Rik	0	0	0	0.0277871
A730043L09Rik	0	0	0	0
A730046J19Rik	0.0192496	0	0.143292	0.0132754
A730056A06Rik	0.774558	0.46828	0.554235	0.598667
A730082K24Rik	0	0	0	0
A730085K08Rik	0.348011	0	0.136597	0.168162
A730090H04Rik	1.18131	0.595501	0.78191	1.11222
A730090N16Rik	0	0	0.126187	0.178253
A730098P11Rik	3.28964	3.40938	2.48429	1.49577
A830009L08Rik	0.0830808	0	0.0190635	0.0574799
A830010M20Rik	1.42344	1.43102	1.89405	1.5594
A830018L16Rik	1.2978	2.47118	2.00453	1.63627
A830019L24Rik	0	0	0	0
A830052D11Rik	0.416724	0.175595	0.535329	0.454662
A830080D01Rik	3.62795	4.28831	5.72864	5.83625
A830082K12Rik	0.514064	0.491978	0.401459	0.657982
A830082N09Rik	0.250023	0.185634	0.422558	0.406825
A930001A20Rik	0	0	0.0426724	0.0516773
A930001C03Rik	0.435267	0.404268	0.632838	0.800101
A930003A15Rik	0.105024	0	0	0.0738754
A930003O13Rik	0.0246992	0	0	0
A930004D18Rik	1.4452	2.16876	1.76726	1.49539
A930005H10Rik	20.0139	35.128	37.6531	11.1927
A930006I01Rik	0.0213295	0.0537249	0	0.0147888
A930006K02Rik	0.444505	0.470194	0.345109	0.421121
A930007I19Rik	0.0408929	0.051494	0.164368	0.226733
A930009A15Rik	0	0	0	0
A930011G23Rik	0.0137423	0	0	0.00949519
A930011O12Rik	0	0	0	0
A930012L18Rik	0.0925109	0.111373	0.126129	0.148937
A930013F10Rik	0.758517	0.857062	2.16602	2.69469
A930015D03Rik	7.79611	8.07712	6.4927	8.78145
A930016O22Rik	0.225761	0.103908	0.218781	0.451909
A930017M01Rik	0.110078	0.225024	0.205071	0.0570438
A930018P22Rik	0.13849	0.263497	0.402696	0.0981798
A930019D19Rik	0	0.143546	0	0
A930024E05Rik	0.434454	0.933964	0.793478	1.15399
A930041C12Rik	0.125777	0	0.296877	0
AA387883	0.0292152	0	0	0
AA388235	0.307433	0.312283	0.501317	0.351001
AA413626	0.410618	0.531592	0	1.39908
AA414768	2.76481	1.66892	1.48971	2.92712
AA415398	2.97259	2.94554	2.95073	1.69428
AA465934	55.5596	78.4851	107.418	55.8905
AA467197	1.16245	1.23384	7.15006	1.80898
AA474331	1.25302	1.68399	1.45911	2.04216
AA536875	0	0	0	0
AA543186	0.779898	0.983309	0.897612	0.823983
AA543401	0	0	0	0
AA545190	0	0	0	0
AA619741	0	0	0	0
AA792892	0	0	0	0
AA986860	1.11948	2.23388	3.5039	1.3163
AA987161	3.45365	4.45948	4.16926	5.66658
AB041803	0.471088	0.241445	0.597394	0.0416177
AB124611	9.05158	3.59284	3.27948	4.55621
AF067061	0	0	0	0
AF067063	0	0	0	0
AF251705	6.05388	4.05796	1.4315	5.46734
AF357355	0	0	0	0
AF357359	0	0	0	0
AF357399	0	0	0	0
AF357425	0	0	0	0
AF357426	0	0	0	0
AF366264	0	0	0	0
AF529169	0.117968	0	0.0245704	0.170194
AI115009	0.0261559	0.065929	0	0
AI118078	0.196159	0.345773	0.112613	0.462061
AI182371	0.321356	0.884518	0.200239	0.261099
AI197445	0.0337019	0	0.0712124	0.0575112
AI314180	26.2996	24.4536	28.6045	26.4234
AI314278	0.0996082	0.0250841	0.0228754	0.0276075
AI317395	0.489192	0.813652	0.962343	0.350674
AI413582	30.9149	40.3736	23.3124	26.5551
AI414108	0.335209	0.257529	0.309217	0.558596
AI427809	1.41597	0.624353	0.461109	1.03899
AI429214	4.17987	8.33376	5.56861	6.5049
AI450353	1.33758	3.90419	2.09192	2.23823
AI462493	55.3079	85.9094	52.615	45.7327
AI463170	1.12188	3.82634	2.50102	1.08872
AI464131	18.4708	12.6215	17.1981	13.8977
AI467606	4.68186	2.50579	2.72061	3.86382
AI504432	0.438466	0.316386	0.390401	0.78343
AI506816	5.92103	5.32018	0.13368	17.3977
AI507597	0.221611	0.271212	0	0.461618
AI593442	0.0478947	0.0200608	0.00912891	0.0654335
AI597479	9.94173	9.96107	12.2506	13.5518
AI606473	1.58633	2.35879	1.01251	2.75059
AI607873	17.5478	8.00544	9.11135	9.93259
AI646519	0	0	0.0935962	0
AI661453	3.03476	3.94958	3.02253	2.37224
AI662270	10.2167	4.64381	5.68387	12.1922
AI747448	0	0	0	0
AI837181	30.7733	35.2765	26.1251	23.6096
AI839979	0.974033	0.503548	0.716253	0.558433
AI846148	8.23032	8.73019	8.09545	8.00733
AI847159	0	0.0675105	0	0.112625
AI848285	0.754618	0.509552	0.341032	0.805586
AI854517	0	0.0164987	0.0300776	0.0271868
AI854703	0.321309	0.87296	0.545046	0.2663
AI987944	4.1224	5.44204	5.29841	5.85144
AK010878	6.32009	6.0617	6.30482	5.31903
AK129341	1.38348	2.23049	1.74416	2.65776
AU015228	0	0.0391948	0	0
AU015791	0	0	0	0
AU015836	0	0	0.0354966	0
AU016765	0	0	0	0
AU018091	0.40037	0.872958	0.489547	0.221267
AU018829	0	0	0	0
AU019823	9.80614	11.4631	9.08915	9.88211
AU019990	0	0	0	0
AU021063	0	0	0	0
AU021092	3.38669	2.09105	1.14629	1.77372
AU022252	6.12122	7.02792	6.29402	6.43378
AU022751	0	0	0	0
AU022754	0.0780428	0.216046	0.393846	0.226661
AU022793	0.0518438	0.0326684	0.0596231	0.0360218
AU023762	0	0	0	0.0151646
AU040320	12.7733	15.4978	15.5951	12.0991
AU040972	0.0513338	0	0.0594415	0.0721779
AU041133	2.11737	2.75481	2.79752	3.57187
AV039307	0.172601	0.510539	0.460728	0.367699
AV051173	0.502268	0.640076	0.589006	0.216816
AV320801	0	0	0	0
AW011738	1.83812	1.71367	2.07001	2.57922
AW046200	0.266097	0.503577	0.651543	0.510163
AW112010	101.347	152.662	141.456	47.2577
AW146154	1.99785	2.88676	2.64619	3.58121
AW209491	10.2728	9.00294	10.6136	11.1285
AW495222	0	0	0.0664242	0
AW549542	0.413228	1.59743	0.887478	0.536353
AW549877	20.2181	26.2867	27.5639	30.1738
AW551984	2.46292	0.506256	1.97846	5.37086
AW554918	1.81947	2.24471	2.1409	2.52563
AW822252	0.0977053	0.123556	0.113038	0.102915
AY074887	0.343128	0.545391	0.501039	0.612888
AY358078	0.205388	0.129582	0.27617	0
AY512915	0	0	0	0
AY512931	0	0	0.0226458	0
AY761184	0	0	0.166897	0
AY761185	0	0	0	0
Aaas	9.12229	7.18198	5.44671	7.4006
Aacs	133.259	195.094	169.169	92.8653
Aadac	0.0788316	0.0497741	0.227446	0.0275576
Aadacl2	0	0	0	0
Aadacl3	0	0	0	0
Aadat	0.0273578	0	0	0
Aaed1	30.8989	38.6204	37.0374	37.6505
Aagab	21.3462	24.7353	19.1562	21.2116
Aak1	3.37658	2.53407	3.79968	4.49186
Aamdc	55.4181	94.8964	101.348	55.1023
Aamp	98.6794	140.442	97.9452	74.5174
Aanat	0.0374097	0	0.0431522	0.0522633
Aar2	11.4247	12.7489	11.2353	9.39296
Aard	0.450908	0.189749	0.130034	0.20999
Aars	27.8511	26.1088	28.8646	21.4627
Aars2	4.41827	5.4023	4.82859	5.04047
Aarsd1	28.0571	32.972	27.0547	19.8167
Aasdh	2.80429	3.32417	3.96751	3.79575
Aasdhppt	15.122	20.2963	19.8603	17.217
Aass	0.371508	0.59186	0.312224	0.436106
Aatf	12.1309	10.9997	9.51065	11.2503
Aatk	4.55651	5.84819	5.77539	2.52233
Abat	3.36537	2.76254	2.88907	3.63347
Abca1	32.0852	24.776	31.0763	25.0853
Abca12	0.0160345	0	0.0122284	0.0110366
Abca13	0	0	0	0.00377757
Abca14	0.00836994	0	0.00958229	0.011538
Abca15	0	0	0	0
Abca16	0	0	0	0
Abca17	0	0	0	0.00597938
Abca2	10.7473	12.65	14.8285	11.5722
Abca3	15.8578	13.8017	15.9664	13.9056
Abca4	0.25868	0.170264	0.331215	0.322306
Abca5	3.72334	4.70515	5.792	4.37015
Abca6	2.64716	1.68894	2.28802	2.20737
Abca7	3.06163	3.10595	3.06854	2.50134
Abca8a	23.0505	18.4792	16.032	14.7752
Abca8b	2.56999	1.08576	2.76691	2.07056
Abca9	9.28372	2.68763	4.15017	8.76026
Abcb10	8.41854	11.7011	10.5509	10.1081
Abcb11	0.0184802	0.0116161	0.0952277	0.00637129
Abcb1a	5.05854	4.21281	3.32772	2.4671
Abcb1b	4.50043	3.0136	4.02816	2.46226
Abcb4	3.67067	0.450331	3.89769	3.43692
Abcb5	0	0	0	0
Abcb6	11.1443	11.2111	9.21919	9.31925
Abcb7	7.29099	8.46727	9.45386	8.69257
Abcb8	19.9233	26.9811	25.9363	16.3161
Abcb9	6.05744	7.60287	6.42139	3.56439
Abcc1	12.6217	9.23465	10.9911	11.3345
Abcc10	3.37875	4.08899	3.27883	3.00292
Abcc12	0.0100615	0	0.0115239	0.0138806
Abcc2	0	0	0.0191461	0.0345806
Abcc3	3.71321	4.69062	3.48625	2.76567
Abcc4	3.45243	3.43474	4.16757	3.87246
Abcc5	13.8389	14.2609	15.6267	14.8723
Abcc6	0	0.0229248	0	0.00628674
Abcc8	1.18683	2.90365	3.08389	0.72389
Abcc9	8.18942	5.18658	8.50116	7.87673
Abcd1	12.187	9.40275	10.7265	9.61724
Abcd2	99.59	109.398	113.264	71.284
Abcd3	36.8005	51.2872	46.086	40.8147
Abcd4	8.35505	8.80805	7.58274	6.70065
Abce1	28.5255	27.4688	30.6664	34.5244
Abcf1	40.6909	38.406	30.8096	33.5193
Abcf2	25.2562	20.4221	23.5635	20.7465
Abcf3	20.0282	22.2829	21.3858	16.6045
Abcg1	8.46588	5.32023	4.03182	3.97056
Abcg2	23.2652	22.0327	17.4001	17.5004
Abcg3	2.24753	0.480953	0.403309	1.0783
Abcg4	0.670663	0.604808	0.34807	0.664156
Abcg5	0.167835	0.501984	0.240966	0.261788
Abcg8	0.0539274	0.0847976	0.0927313	0.00931441
Abhd1	22.2854	45.062	30.6195	19.2165
Abhd10	6.58406	8.42416	8.27878	6.99615
Abhd11	47.3397	62.1915	51.8264	50.4691
Abhd11os	6.05461	12.9978	6.50898	4.54449
Abhd12	61.3875	68.219	47.189	41.01
Abhd12b	0	0.0618478	0	0.103034
Abhd13	10.8473	10.866	11.0613	13.0381
Abhd14a	17.5528	22.1981	15.306	16.3794
Abhd14b	29.2195	63.6108	30.0835	21.7223
Abhd15	18.777	14.9498	17.5363	10.2851
Abhd16a	54.2268	66.2049	51.6315	37.3481
Abhd16b	0.0274442	0.172974	0.0631494	0.133574
Abhd17a	61.1753	79.0712	63.0754	57.4898
Abhd17b	18.2896	26.1889	24.3612	23.7669
Abhd17c	19.7704	50.6798	26.9294	22.6
Abhd2	18.4642	7.18042	12.1898	22.4381
Abhd3	6.02339	16.8611	12.3207	6.37481
Abhd4	42.2548	62.0714	55.6149	47.1058
Abhd5	96.2982	103.441	103.903	72.5002
Abhd6	10.9687	12.1404	8.36862	5.86309
Abhd8	10.1043	6.44179	7.29795	12.0957
Abi1	29.9336	30.9664	33.6488	30.2303
Abi2	4.64082	4.63948	5.07157	6.04695
Abi3	7.12908	6.33042	7.06646	5.73672
Abi3bp	11.3105	10.0357	13.0703	10.9928
Abl1	19.9639	15.1205	15.9331	22.6321
Abl2	4.35064	2.80948	4.22663	5.02005
Ablim1	33.008	29.3668	39.7624	27.3754
Ablim2	3.32681	3.42613	4.70653	3.18636
Ablim3	12.9457	17.5829	19.6766	10.9693
Abo	0.0591831	0.0373122	0.0935346	0.617893
Abr	10.0424	7.76711	8.25097	10.8305
Abra	5.86632	0	9.55137	11.6991
Abracl	53.9537	48.2159	31.0583	64.3274
Abt1	3.67904	4.42073	3.86373	3.18468
Abtb1	11.8908	21.8939	13.9704	10.9434
Abtb2	3.12531	1.62681	1.58454	2.11449
Acaa1a	50.2407	58.4376	40.4104	27.5485
Acaa1b	35.2366	39.4237	15.2695	10.1323
Acaa2	126.734	124.067	170.479	93.8169
Acaca	12.138	77.6125	58.9373	24.0238
Acacb	40.5032	55.6024	54.1435	40.0106
Acad10	5.90537	6.28006	5.37393	3.39566
Acad11	78.92	74.8761	47.07	49.088
Acad12	4.79672	5.43826	4.66228	3.65462
Acad8	19.628	26.0516	26.8449	18.4146
Acad9	16.3728	19.0043	20.1119	23.5796
Acadl	183.73	188.984	222.043	148.052
Acadm	102.112	162.325	143.386	76.5204
Acads	77.6472	109.341	92.3348	59.5623
Acadsb	96.9986	108.288	97.1549	69.3428
Acadvl	151.153	217.38	174.498	104.854
Acan	0.0121341	0.00762357	0	0.012532
Acap1	1.29021	2.10207	0.958386	1.47182
Acap2	18.1942	17.5083	19.3062	18.912
Acap3	11.8342	8.43475	8.26404	9.48201
Acat1	92.917	108.192	101.165	73.0889
Acat2	30.8557	69.7796	51.7315	24.5152
Acat3	0.615294	0.547848	0.330585	0.70797
Acbd3	17.0024	16.2529	18.0465	19.8834
Acbd4	54.4471	112.92	88.6749	44.5659
Acbd5	22.0078	31.0525	31.676	22.5499
Acbd6	35.3959	50.757	35.1318	25.9086
Acbd7	1.26467	0.80897	0.298662	2.02678
Accs	3.20634	4.2439	3.86203	3.16544
Accsl	0.683886	0.888209	0.171845	0.281546
Acd	17.897	20.6744	16.2053	16.8644
Ace	28.6782	18.6868	20.9216	20.4703
Ace2	0.188573	0.203326	0.216172	0.130277
Ace3	0	0	0	0
Acer1	0	0.0244546	0	0
Acer2	11.6108	14.6616	15.6882	8.82317
Acer3	7.7895	5.21575	5.73066	7.57912
Ache	0.969301	0.542396	1.31136	0.746446
Acin1	40.6745	49.2213	38.8142	45.4166
Ackr1	25.1783	16.9335	17.4599	13.142
Ackr2	6.07763	1.0096	1.56504	3.37253
Ackr3	28.6398	18.0228	26.3089	24.6068
Ackr4	3.69528	2.79883	3.25538	5.17467
Acly	64.2955	871.91	1148.81	228.319
Acmsd	0	0	0.0236377	0.0576578
Acn9	18.7826	26.179	24.1477	23.4213
Acnat1	0.107388	0.0224994	0.0614805	0.0370186
Acnat2	0	0	0	0
Aco1	69.6001	76.7106	63.853	50.3586
Aco2	121.278	169.472	161.755	98.9261
Acot1	25.0598	28.4406	15.128	33.5667
Acot10	8.84968	7.90408	8.33413	6.81966
Acot11	0.920565	1.56602	3.29763	2.85779
Acot12	0	0.0384708	0.0348855	0.107473
Acot13	81.361	101.701	81.7452	74.0225
Acot2	8.68526	13.0665	9.40521	6.15802
Acot3	0.77816	0.227802	0.0830804	0.275634
Acot4	7.08869	6.66904	3.76622	4.20693
Acot5	0.0655213	0.123987	0.11323	0.15984
Acot6	2.05229	2.08281	1.90082	2.55648
Acot7	20.255	22.3489	15.9575	18.7766
Acot8	13.7679	16.5999	15.0238	10.6998
Acot9	12.9426	13.1739	13.1739	12.0315
Acox1	166.775	217.307	140.953	108.478
Acox2	0.404447	1.38214	2.43193	0.386886
Acox3	12.8031	13.2989	12.3546	10.2158
Acoxl	0.0488402	0.47122	0.859109	0.484254
Acp1	3.89425	4.23334	1.16242	2.64332
Acp2	17.2639	18.5808	17.9661	15.9398
Acp5	325.998	431.735	266.029	207.407
Acp6	21.0831	37.9579	29.6597	23.1606
Acpp	0.97331	1.00473	0.857345	1.12245
Acpt	0	0	0	0
Acr	0.2988	0.693473	0.253394	0.102257
Acrbp	4.29577	6.35265	4.24786	4.74089
Acrv1	0	0	0.0556323	0.168809
Acsbg1	4.94566	6.22441	11.5225	2.1533
Acsbg2	0	0	0	0
Acsf2	5.61844	7.60144	9.71712	5.41944
Acsf3	13.1314	22.8658	20.9552	11.9316
Acsl1	534.693	548.085	499.846	268.289
Acsl3	13.3082	13.3891	11.961	11.0392
Acsl4	12.4916	12.3498	16.38	12.6313
Acsl5	36.6681	37.3214	33.7966	34.5737
Acsl6	0.935383	0.0227897	1.35095	1.20644
Acsm1	0	0	0	0
Acsm2	0	0	0	0
Acsm3	34.3722	24.8556	13.1752	11.8106
Acsm4	0	0	0	0
Acsm5	12.9083	7.30458	6.66063	6.66247
Acss1	11.368	11.8727	10.76	13.3998
Acss2	24.761	291.947	309.306	101.152
Acss2os	0.100496	0	0.233378	0
Acss3	32.1384	20.8864	24.6105	27.8387
Acta1	2063.59	8.24902	2485.99	2089.95
Acta2	208.944	164.112	119.816	140.143
Actb	637.446	546.016	372.568	514.108
Actbl2	0	0	0	0.0118146
Actc1	3.91597	0.228831	32.8222	5.16397
Actg1	18.9914	20.2978	11.5946	7.42999
Actg2	11.9519	6.39785	8.07814	10.0564
Actl10	0	0	0	0.0925411
Actl11	0	0	0	0
Actl6a	23.5201	16.6966	17.2296	22.1199
Actl6b	0	0	0	0
Actl7a	0.0331101	0	0	0
Actl7b	0.0353449	0.0446064	0.040748	0
Actl9	0.0738112	0.326108	0.297951	0.103091
Actn1	27.9322	20.7856	24.7096	24.8694
Actn2	21.5081	0.0783334	23.8481	22.6006
Actn3	222.03	0.75072	279.669	181.481
Actn4	129.9	129.471	114.305	102.301
Actr10	15.6955	20.7367	18.0217	14.6005
Actr1a	62.5694	71.0079	63.5422	53.2492
Actr1b	43.0322	43.6108	47.4394	46.1573
Actr2	46.6534	44.2957	47.4951	47.5525
Actr3	38.8722	38.5311	30.1427	28.9634
Actr3b	3.0888	2.01924	2.50149	2.40744
Actr5	5.42865	5.7838	3.85883	4.69839
Actr6	11.1843	13.7748	13.5337	11.3616
Actr8	17.906	22.4698	17.8573	15.5782
Actrt1	0	0	0	0
Actrt2	0	0	0	0
Actrt3	0.0255561	0	0	0.0177538
Acvr1	12.7844	12.2406	11.8385	11.6148
Acvr1b	8.14127	8.34608	10.1417	10.2301
Acvr1c	15.3272	12.9975	16.4445	12.3175
Acvr2a	8.86862	8.04493	8.42203	9.89796
Acvr2b	1.43947	1.88748	1.88864	2.00297
Acvrl1	15.9027	14.8775	14.5763	10.2552
Acy1	9.63035	8.13659	7.02746	8.59327
Acy3	8.28382	11.7051	8.93381	5.31288
Acyp1	22.5563	39.6297	32.7678	28.6187
Acyp2	62.7931	88.3211	125.378	93.437
Ada	4.20263	2.57713	2.41878	4.16397
Adad1	0	0	0	0.0169472
Adad2	0	0	0	0
[truncated: 21,992 more rows]

## Sheet: Cuffdiff
Cuffdiff results
Transcript	wt vs Gain(Myc+Pvt1)	Gain(Myc) vs Gain(MYC+Pvt1)	Gain(Pvt1) vs Gain(Myc+Pvt1)	Location
Dmbt1	X	X	X	chr7:131032075-131121628
Lrrc15	X	X	X	chr16:30269301-30283254
Ly6d	X	X	X	chr15:74762055-74763567
Spp1	X	X		chr5:104435110-104441053
Klk1b22	X		X	chr7:44112682-44116876
Calca	X		X	chr7:114631477-114636357
Csn1s1	X		X	chr5:87666207-87682577
Csn1s2a	X		X	chr5:87774566-87788797
Csn2	X		X	chr5:87692618-87699425
Gjb2	X		X	chr14:57098601-57104702
Rspo1	X		X	chr4:124986429-125009099
Timp4	X		X	chr6:115134901-115282626
Wfdc2	X		X	chr2:164562715-164568506
Gm4847	X			chr1:166628970-166647693
Acss2	X			chr2:155518042-155562743
Agt	X			chr8:124556586-124569707
Agtr1a	X			chr13:30336355-30382867
C4b	X			chr17:34728380-34743897
Ces1f	X			chr8:93256235-93279736
Col7a1	X			chr9:108953744-108984875
Crym	X			chr7:120186383-120201988
Dio2	X			chr12:90724551-90738438
Elovl6	X			chr3:129532385-129638493
Erbb2	X			chr11:98412483-98438988
Fosb	X			chr7:19302695-19310045
Frem1	X			chr4:82897919-83052167
Gdpd3	X			chr7:126766413-126775645
Gm20554	X			chr13:72623465-72628564
Gpnmb	X			chr6:49036517-49058182
Hspa8	X			chr9:40801272-40805199
Ifi44l	X			chr3:151758736-151762891
Mfap4	X			chr11:61485443-61488704
Penk	X			chr4:4133535-4138445
Pi15	X			chr1:17601900-17630939
Rgs2	X			chr1:143999337-144004149
Sfn	X			chr4:133600555-133602168
Slc43a1	X			chr2:84839407-84863586
Tfap2b	X			chr1:19208913-19238845
Tnfsf11	X			chr14:78277445-78308043
Nr1h5		X	X	chr3:102939657-102964133
Tmprss2		X	X	chr16:97564681-97611195
2310065F04Rik		X		chr11:67112460-67120080
Abra		X		chr15:41865292-41869720
Asb15		X		chr6:24528143-24573164
Ldb3		X		chr14:34526698-34588681
Lrrc30		X		chr17:67630964-67632723
Mettl21e		X		chr1:44204069-44218931
Myf6		X		chr10:107492859-107494729
Mypn		X		chr10:63115794-63203952
Nctc1		X		chr7:142544608-142558598
Ppp1r27		X		chr11:120549974-120551132
Tmem233		X		chr5:116040533-116083246
Ak1		X		chr2:32621757-32635058
Art1		X		chr7:102101742-102111148
Btn1a1		X		chr13:23456992-23465901
Casr		X		chr16:36493695-36562134
Ckm		X		chr7:19411093-19421583
Cmya5		X		chr13:93040714-93144724
Des		X		chr1:75360291-75375015
Dppa1		X		chr11:46607009-46629274
Eno3		X		chr11:70657175-70662513
Fitm1		X		chr14:55575673-55576952
Flnc		X		chr6:29433152-29461888
H19		X		chr7:142575531-142578146
Hspb3		X		chr13:113662895-113663676
Itgb1bp2		X		chrX:101449108-101453541
Klhl40		X		chr9:121777606-121783819
Ldb3		X		chr14:34526698-34588681
Lsmem1		X		chr12:40176385-40199315
Mafa		X		chr15:75746842-75747922
Musk		X		chr4:58285961-58374303
Myl1		X		chr1:66924295-66945056
Mylpf		X		chr7:127211607-127214287
Myom1		X		chr17:71019556-71126856
Myoz3		X		chr18:60573716-60591716
Neb		X		chr2:52136646-52338798
Popdc3		X		chr10:45289304-45318450
Ppp1r3a		X		chr6:14713821-14755274
Pvalb		X		chr15:78191117-78206351
Pygm		X		chr19:6384428-6398459
Smco1		X		chr16:32271608-32274779
Tceal7		X		chrX:136224040-136226100
Tmem38a		X		chr8:72572102-72587284
Yipf7		X		chr5:69516669-69542647
Zfp618		X		chr4:62965573-63134030
9830107B12Rik			X	chr17:48125604-48146307
Aqp5			X	chr15:99591027-99594829
Areg			X	chr5:91139614-91148432
BC147527			X	chr13:120300391-120308841
Cdkn1c			X	chr7:143458338-143461050
Gm14305			X	chr2:176708352-176721813
H2-Ea-ps			X	chr17:34342211-34344645
Igj			X	chr5:88519808-88527897
Inhbb			X	chr1:119415464-119422248
Kcng1			X	chr2:168261697-168269331
Marc1			X	chr1:184786766-184811300
Mlph			X	chr1:90915099-90951142
Mpeg1			X	chr19:12460778-12465285
Muc15			X	chr2:110655200-110950244
Pax1			X	chr2:147364993-147375048
Pgr			X	chr9:8899832-8968611
Ptn			X	chr6:36715662-36811361
Ptx3			X	chr3:66053557-66296837
Rbp1			X	chr9:98422960-98446550
Rps8			X	chr4:117153835-117156132
Serpina12			X	chr12:104028768-104044443
Slc40a1			X	chr1:45908069-45925594
Tnfaip6			X	chr2:52038112-52056681
Trim12a			X	chr7:104299896-104324838
Wfdc18			X	chr11:83709003-83711360

## Sheet: Figure_Data
Gene Name	2N	3N Myc	3N Pvt1	3N
Actb	637.446	546.016	372.568	514.108
Dmbt1	1.13474	4.05263	4.53723	0
Lrrc15	3.49114	1.82583	3.42318	30.4286
Ly6d	137.347	372.811	189.464	12.4366
Myc	33.6844	23.3997	14.4414	44.9328
Pvt1	3.12097	3.11117	4.16711	5.40998
Rspo1	16.1661	3.13464	4.13887	81.6622

## Sheet: Figures_Normalized
Gene Name	2N	3N Myc	3N Pvt1	3N
Actb	637.446	546.016	372.568	514.108
Dmbt1	1.13474	4.05263	4.53723	0
Lrrc15	3.49114	1.82583	3.42318	30.4286
Ly6d	137.347	372.811	189.464	12.4366
Myc	33.6844	23.3997	14.4414	44.9328
Pvt1	3.12097	3.11117	4.16711	5.40998
Rspo1	16.1661	3.13464	4.13887	81.6622
Gene Name	wt	Gain Myc	Gain Pvt1	Gain Myc+Pvt1
Actb	1	1	1	1
Dmbt1	0.00178014	0.00742218	0.0121783	0
Lrrc15	0.00547676	0.00334391	0.00918807	0.0591872
Ly6d	0.215465	0.682784	0.508535	0.0241906
Myc	0.0528428	0.0428553	0.0387618	0.0873995
Pvt1	0.00489605	0.00569795	0.0111848	0.010523
Rspo1	0.0253607	0.00574093	0.011109	0.158843

## Sheet: TCGA data
	Quartile	MYC|4609	PVT1|5820	RSPO1|284654	ACTB|60
TCGA-AC-A23H-01A-11R-A157-07	1	99.085	73.1979	2.3804	117336	849 tumors	MYC|4609	PVT1|5820	RSPO1|284654	ACTB|60
TCGA-AR-A0TR-01A-11R-A084-07	1	99.6997	37.353	3.2959	42131.8	qaurtile t-test (high 212 vs low 212)	5.0306e-98	2.41326e-15	0.0365515	0.561953
TCGA-C8-A1HK-01A-21R-A13Q-07	1	101.025	39.5099	3.5009	74407.6	Average fold change	8.35548	2.29131	3.07196	0.976786
TCGA-C8-A26Y-01A-11R-A16F-07	1	119.015	82.6067	6.119	107403
TCGA-A2-A0D1-01A-11R-A034-07	1	135.138	295.233	5.1795	79208.9	octile t-test (high 106 vs low 106)	5.92147e-63	4.25277e-12	0.110727	0.164905
TCGA-D8-A1JA-01A-11R-A13Q-07	1	135.699	30.8776	0.5417	91063.1		16.131	3.4122	3.83532	1.07913
TCGA-AO-A03N-01B-11R-A10J-07	1	138.207	76.1142	11.5173	217871
TCGA-A8-A084-01A-21R-A00Z-07	1	139.611	72.7062	10.4418	86188.9
TCGA-A8-A094-01A-11R-A00Z-07	1	163.023	8.1199	2.4984	76006.9
TCGA-BH-A18P-01A-11R-A12D-07	1	169.917	37.7186	8.0564	76922.5
TCGA-A8-A081-01A-11R-A00Z-07	1	171.912	69.7009	768.531	61391.9
TCGA-E2-A152-01A-11R-A12D-07	1	179.282	24.1417	9.4984	101363
TCGA-D8-A1JS-01A-11R-A13Q-07	1	180.614	69.79	1.2924	47568.7
TCGA-BH-A0E7-01A-11R-A034-07	1	187.026	74.8102	6.9056	49523.2
TCGA-A7-A13G-01A-11R-A13Q-07	1	189.144	72.3751	8.3406	39027.9
TCGA-AQ-A1H2-01A-11R-A13Q-07	1	196.187	129.453	6.0211	54766.9
TCGA-C8-A138-01A-11R-A115-07	1	196.738	123.796	10.2735	148852
TCGA-E2-A10C-01A-21R-A10J-07	1	201.713	174.12	0	133665
TCGA-A8-A099-01A-11R-A00Z-07	1	203.354	76.3907	0.5323	47673.1
TCGA-AC-A23C-01A-12R-A169-07	1	212.062	86.3288	32.1853	77291.9
TCGA-A8-A09G-01A-21R-A00Z-07	1	226.201	44.9954	3.9792	73494.9
TCGA-BH-A0DH-01A-11R-A084-07	1	226.948	63.2292	3.7636	86834.8
TCGA-C8-A1HE-01A-11R-A13Q-07	1	232.567	73.1462	11.2533	48633.9
TCGA-A8-A08L-01A-11R-A00Z-07	1	235.406	107.868	0	64411.2
TCGA-EW-A2FR-01A-11R-A21T-07	1	239.052	20.096	17.0966	123582
TCGA-E9-A1R3-01A-31R-A14M-07	1	242.485	222.194	9.018	108582
TCGA-B6-A0WZ-01A-11R-A109-07	1	245.77	127.409	18.0979	147126
TCGA-D8-A1JG-01B-11R-A13Q-07	1	257.163	64.1615	13.9706	73462
TCGA-E2-A15K-06A-11R-A12P-07	1	260.694	79.488	0	61830.6
TCGA-AO-A125-01A-11R-A10J-07	1	263.397	315.244	0	85427
TCGA-E2-A1LB-01A-11R-A144-07	1	281.703	81.7702	0	86573.1
TCGA-A8-A0A7-01A-11R-A00Z-07	1	283.078	23.5571	66.3526	118279
TCGA-B6-A1KI-01A-11R-A14M-07	1	292.84	54.8709	15.5516	57700.4
TCGA-B6-A0I9-01A-11R-A034-07	1	293.818	78.3939	6.0548	77108.3
TCGA-AR-A0TX-01A-11R-A084-07	1	294.078	19.6277	20.3046	75599.7
TCGA-D8-A1XU-01A-11R-A14M-07	1	301.806	108.914	44.1387	88487.2
TCGA-E2-A1IL-01A-11R-A14D-07	1	304.024	23.845	18.3423	53621
TCGA-A8-A06R-01A-11R-A00Z-07	1	307.942	456.492	235.656	95620.1
TCGA-BH-A1EY-01A-11R-A13Q-07	1	320.354	71.1897	0.4876	94701.9
TCGA-A8-A07J-01A-11R-A00Z-07	1	324.324	74.5256	23.9218	94880.7
TCGA-A2-A0CS-01A-11R-A115-07	1	331.334	95.5238	8.7679	121811
TCGA-D8-A13Z-01A-11R-A115-07	1	332.793	50.4723	8.9069	137037
TCGA-E9-A1RD-01A-11R-A157-07	1	332.926	64.8357	18.7818	61484.3
TCGA-E9-A24A-01A-11R-A169-07	1	337.133	83.0834	15.2969	66158.4
TCGA-E9-A22H-01A-11R-A157-07	1	339.154	67.3265	3.0259	58344.1
TCGA-A2-A0EV-01A-11R-A034-07	1	339.649	55.7895	48.0702	111462
TCGA-D8-A1J8-01A-11R-A13Q-07	1	341.824	57.5185	14.7905	106907
TCGA-D8-A27H-01A-11R-A16F-07	1	342.72	92.442	9.929	108340
TCGA-A8-A08J-01A-11R-A00Z-07	1	344.311	147.705	7.3187	85599.1
TCGA-D8-A1J9-01A-11R-A13Q-07	1	345.631	64.6259	18.315	53009.7
TCGA-AO-A0J5-01A-11R-A034-07	1	350.435	98.1217	37.8469	102448
TCGA-A8-A083-01A-21R-A00Z-07	1	355.065	49.3506	2.5974	50985.5
TCGA-AN-A0XS-01A-22R-A109-07	1	362.568	141.562	2.9424	96464.4
TCGA-E2-A15K-01A-11R-A12P-07	1	365.132	111.76	6.1238	93947.4
TCGA-AR-A250-01A-31R-A169-07	1	366.17	131.347	56.8433	74450.6
TCGA-A2-A0SW-01A-11R-A084-07	1	367.653	152.677	0.8775	144442
TCGA-D8-A1JE-01A-11R-A13Q-07	1	370.023	92.1502	2.2753	88845.6
TCGA-C8-A26V-01A-11R-A16F-07	1	372.381	71.4919	8.6859	82850.9
TCGA-C8-A274-01A-11R-A16F-07	1	373.392	88.5078	2.2127	90907.2
TCGA-BH-A0EE-01A-11R-A034-07	1	374.895	67.2803	0.3347	150247
TCGA-BH-A1EX-01A-11R-A13Q-07	1	376.084	63.5071	2.3609	153854
TCGA-D8-A1JN-01A-11R-A13Q-07	1	378.779	95.8608	1.0363	46152.6
TCGA-AN-A0FV-01A-11R-A00Z-07	1	382.141	69.8992	10.7537	110294
TCGA-E9-A1NH-01A-11R-A14D-07	1	383.274	52.7728	49.6422	129237
TCGA-AN-A0XR-01A-11R-A109-07	1	388.59	153.369	4.1339	64547.3
TCGA-BH-A0BS-01A-11R-A12P-07	1	388.738	50.4938	3.2368	74267.3
TCGA-E9-A22E-01A-11R-A157-07	1	390.49	102.209	126.544	160038
TCGA-EW-A1OV-01A-11R-A144-07	1	396.625	34.8101	4.7468	111330
TCGA-A8-A0A6-01A-12R-A056-07	1	402.181	45.2188	7.4478	73170.4
TCGA-BH-A1ET-01A-11R-A137-07	1	402.346	67.3807	19.3746	59775
TCGA-D8-A1XT-01A-11R-A14M-07	1	404.26	30.6899	6.6142	112645
TCGA-BH-A0GZ-01A-11R-A056-07	1	410.734	140.905	36.4245	124068
TCGA-AN-A0XP-01A-11R-A109-07	1	410.933	94.2122	13.8264	63754.3
TCGA-BH-A0W3-01A-11R-A109-07	1	414.581	61.0452	0.8783	39298.6
TCGA-B6-A0X5-01A-21R-A109-07	1	415.985	107.034	2.337	54014
TCGA-C8-A1HL-01A-11R-A137-07	1	416.107	156.428	3.0976	150440
TCGA-A1-A0SI-01A-11R-A144-07	1	418.776	39.435	99.7646	113453
TCGA-A8-A09T-01A-11R-A00Z-07	1	426.887	99.0566	104.56	78228
TCGA-A2-A0CQ-01A-21R-A034-07	1	429.12	192.586	2.5011	122492
TCGA-D8-A27P-01A-11R-A16F-07	1	431.442	43.7352	18.1245	56569.3
TCGA-A1-A0SG-01A-11R-A144-07	1	435.244	104.761	37.0804	94728.8
TCGA-E9-A1R7-01A-11R-A14M-07	1	437.368	90.7811	0.7037	41523.2
TCGA-D8-A1XR-01A-11R-A14M-07	1	438.027	132.758	0.25	61313.1
TCGA-A1-A0SM-01A-11R-A084-07	1	449.495	53.346	20.8333	112777
TCGA-C8-A275-01A-21R-A16F-07	1	449.838	60.6061	5.2957	75517.5
TCGA-A7-A0CH-01A-21R-A00Z-07	1	450.085	54.9522	58.8774	67855.6
TCGA-E2-A1L9-01A-11R-A13Q-07	1	450.552	130.962	12.1261	166556
TCGA-A8-A07G-01A-11R-A034-07	1	452.61	49.794	84.8214	113927
TCGA-BH-A18J-01A-11R-A12D-07	1	455.701	106.237	30.4033	133848
TCGA-GM-A2D9-01A-11R-A18M-07	1	457.701	269.704	10.846	131719
TCGA-E2-A159-01A-11R-A115-07	1	471.113	57.148	10.3581	138958
TCGA-BH-A1FJ-01A-11R-A13Q-07	1	476.924	116.436	8.1805	67780.8
TCGA-AO-A0J8-01A-21R-A034-07	1	478.236	104.466	16.7846	101757
TCGA-A8-A09R-01A-11R-A00Z-07	1	478.733	132.998	12.9543	64055.8
TCGA-A8-A0AD-01A-11R-A056-07	1	490.632	101.525	27.0153	69878.4
TCGA-D8-A1XO-01A-11R-A14M-07	1	500.174	70.8162	95.3509	55778.9
TCGA-D8-A1X7-01A-11R-A14M-07	1	500.445	93.4055	9.861	50421.4
TCGA-E2-A14O-01A-31R-A115-07	1	502.204	163.126	9.2184	112002
TCGA-B6-A0WT-01A-11R-A109-07	1	509.012	84.5245	58.4214	63811.1
TCGA-BH-A0EI-01A-11R-A115-07	1	519.892	61.0274	63.3449	56221.7
TCGA-A8-A08S-01A-11R-A034-07	1	522.258	203.548	1.6129	58417.7
TCGA-C8-A1HF-01A-11R-A137-07	1	530.442	141.075	5.643	118938
TCGA-BH-A0AW-01A-11R-A056-07	1	533.107	31.6921	20.9394	130735
TCGA-BH-A0BW-01A-11R-A115-07	1	535.004	82.1665	1.4738	65401.3
TCGA-EW-A1PE-01A-11R-A144-07	1	543.908	72.7966	11.444	70137.5
TCGA-BH-A0EB-01A-11R-A034-07	1	545.275	70.4643	43.4639	110538
TCGA-D8-A146-01A-31R-A115-07	1	546.814	60.8758	85.7957	77530.1
TCGA-A8-A0A1-01A-11R-A00Z-07	1	551.707	71.7871	7.5301	81425.7
TCGA-AR-A24M-01A-11R-A169-07	1	553.031	54.5421	39.5747	57684.9
TCGA-BH-A0B0-01A-21R-A115-07	1	553.49	53.6968	14.8699	104912
TCGA-A2-A0EY-01A-11R-A034-07	1	556.531	98.0607	5.1226	117348
TCGA-B6-A0IP-01A-11R-A034-07	1	556.572	112.883	31.0918	69346
TCGA-AQ-A0Y5-01A-11R-A14M-07	1	563.057	55.4232	26.476	83339.5
TCGA-AN-A04D-01A-21R-A034-07	1	564.929	59.3147	2.0155	103597
TCGA-D8-A1JF-01A-11R-A13Q-07	1	564.968	66.9614	33.0459	69233.1
TCGA-B6-A0IB-01A-11R-A034-07	1	565.611	148.352	7.4337	105040
TCGA-B6-A0RO-01A-22R-A084-07	1	570.019	29.6075	3.2897	61757
TCGA-BH-A0DS-01A-11R-A056-07	1	573.212	246.76	28.8046	151881
TCGA-D8-A1X9-01A-12R-A157-07	1	573.669	94.3468	8.8529	70776
TCGA-C8-A12Q-01A-11R-A115-07	1	575.267	20.3	1.4926	99306.8
TCGA-BH-A0BR-01A-21R-A115-07	1	578.97	18.0258	4.2918	113379
TCGA-BH-A1EV-01A-11R-A137-07	1	579.412	108.664	34.1515	100758
TCGA-GM-A3NY-01A-11R-A21T-07	1	580.243	274.87	8.6655	150765
TCGA-B6-A0RH-01A-21R-A115-07	1	583.219	369.67	34.3879	190714
TCGA-A7-A26E-01A-11R-A169-07	1	584.285	55.4818	29.7319	89110.7
TCGA-B6-A0IC-01A-11R-A034-07	1	589.719	108.335	19.4571	46208.5
TCGA-A2-A0YE-01A-11R-A109-07	1	591.255	8.5551	7.6046	123711
TCGA-B6-A0WW-01A-11R-A109-07	1	594.549	157.297	17.0358	104375
TCGA-AO-A0JA-01A-11R-A056-07	1	598.764	98.1465	21.8888	92867.8
TCGA-EW-A1IY-01A-11R-A13Q-07	1	604.153	134.037	4.7971	126162
TCGA-E9-A229-01A-31R-A157-07	1	613.799	111.875	62.122	78542.9
TCGA-GM-A2DO-01A-11R-A18M-07	1	618.11	323.819	20.6693	129811
TCGA-A2-A0T1-01A-21R-A084-07	1	623.229	65.9185	2.9963	138023
TCGA-A2-A0YG-01A-21R-A109-07	1	625.102	118.13	3.2814	91021.8
TCGA-E9-A226-01A-21R-A157-07	1	627.635	137.204	12.3257	101151
TCGA-EW-A1P5-01A-11R-A144-07	1	627.772	133.244	7.614	66248
TCGA-BH-A0BZ-01A-31R-A12P-07	1	632.501	297.683	18.4165	120669
TCGA-D8-A143-01A-11R-A115-07	1	637.422	26.1021	2.648	119890
TCGA-A8-A091-01A-11R-A00Z-07	1	640.881	176.989	7.8335	27202.9
TCGA-D8-A1JK-01A-11R-A13Q-07	1	644.669	74.8064	9.053	219777
TCGA-A2-A04X-01A-21R-A034-07	1	646.301	258.448	9.0114	107201
TCGA-C8-A12N-01A-11R-A115-07	1	650.207	316.84	53.2097	127461
TCGA-D8-A1X5-01A-11R-A14D-07	1	653.213	153.594	0.4363	74937.1
TCGA-A8-A06Z-01A-11R-A00Z-07	1	654.297	220.125	2.5331	59690.7
TCGA-C8-A1HI-01A-11R-A137-07	1	654.762	115.942	4.1408	69696.9
TCGA-AN-A0XO-01A-11R-A109-07	1	658.944	138.156	49.7477	105390
TCGA-A7-A0DB-01A-11R-A00Z-07	1	659.067	43.2992	41.7665	100255
TCGA-A8-A09V-01A-11R-A034-07	1	660.159	130.602	94.8584	46150.4
TCGA-BH-A0DQ-01A-11R-A084-07	1	660.809	85.8194	6.9473	97734
TCGA-A8-A07W-01A-11R-A00Z-07	1	661.635	514.817	1.5889	89132
TCGA-D8-A27G-01A-11R-A16F-07	1	662.027	76.4001	0.9712	88732.3
TCGA-E2-A15I-01A-21R-A137-07	1	663.751	72.7688	10.5974	57579.2
TCGA-A1-A0SH-01A-11R-A084-07	1	665.965	41.8937	140.85	133483
TCGA-BH-A208-01A-11R-A157-07	1	668.918	20.4815	99.793	178154
TCGA-D8-A1JU-01A-11R-A13Q-07	1	674.164	49.3596	44.0487	69686.3
TCGA-D8-A27L-01A-11R-A16F-07	1	676.415	187.923	53.6149	77532.9
TCGA-AO-A126-01A-11R-A10J-07	1	678.113	230.511	98.283	153079
TCGA-A8-A076-01A-21R-A00Z-07	1	686.902	244.916	1.7943	98762.9
TCGA-A2-A0ER-01A-21R-A034-07	1	690.409	41.5873	5.7258	53561.4
TCGA-A8-A08I-01A-11R-A00Z-07	1	691.774	207.797	16.7649	48984.5
TCGA-D8-A1JT-01A-31R-A13Q-07	1	692.674	287.969	4.1691	91372.2
TCGA-BH-A1FM-01A-11R-A13Q-07	1	695.605	274.762	0.3625	167951
TCGA-E9-A22D-01A-11R-A157-07	1	695.798	131.219	144.625	93165.5
TCGA-A8-A095-01A-11R-A00Z-07	1	706.766	73.3145	4.7963	77547.3
TCGA-C8-A3M7-01A-12R-A21T-07	1	708.005	44.9475	45.9318	74222.4
TCGA-A2-A0CW-01A-21R-A115-07	1	711.596	187.383	2.5866	65706
TCGA-B6-A0I5-01A-11R-A034-07	1	712.248	406.519	13.9986	212488
TCGA-C8-A273-01A-11R-A16F-07	1	716.527	176.859	4.3995	133925
TCGA-EW-A2FW-01A-11R-A17B-07	1	719.018	70.7108	0.7443	54927.4
TCGA-BH-A0HY-01A-11R-A056-07	1	723.162	67.6471	11.0294	83382
TCGA-AO-A0JF-01A-11R-A056-07	1	724.443	41.8909	6.9178	67210.6
TCGA-E2-A15C-01A-31R-A12D-07	1	724.8	172.4	21.2	71211.6
TCGA-A8-A09I-01A-22R-A034-07	1	725.871	222.267	3.8046	112882
TCGA-A8-A09W-01A-11R-A00Z-07	1	727.12	176.958	5.8706	63711.1
TCGA-E9-A1NG-01A-21R-A14M-07	1	739.342	74.9086	16.1389	162354
TCGA-AR-A24N-01A-11R-A169-07	1	739.538	393.327	34.2406	76802.8
TCGA-D8-A142-01A-11R-A115-07	1	739.973	56.5737	13.2802	193875
TCGA-A7-A0CG-01A-12R-A056-07	1	740.581	28.6499	31.0047	75110.7
TCGA-D8-A1JJ-01A-31R-A14M-07	1	740.643	134.127	11.7656	90404
TCGA-E2-A1LH-01A-11R-A14D-07	1	743.971	266.255	11.5763	188366
TCGA-D8-A27N-01A-11R-A16F-07	1	758.09	309.526	8.2761	116952
TCGA-D8-A27K-01A-11R-A16F-07	1	761.641	100.293	16.607	70252
TCGA-GI-A2C8-01A-11R-A16F-07	1	761.713	131.526	71.2851	91635.2
TCGA-D8-A1X8-01A-11R-A14M-07	1	762.314	33.4209	25.7818	57907.5
TCGA-E2-A1B4-01A-11R-A12P-07	1	762.673	87.5025	29.3437	59838.7
TCGA-AR-A1AP-01A-11R-A12P-07	1	765.182	199.73	6.2978	98516.4
TCGA-E9-A1N6-01A-11R-A144-07	1	769.596	133.492	6.6508	192809
TCGA-EW-A1OX-01A-11R-A144-07	1	770.966	77.9055	0	45800.3
TCGA-E2-A10E-01A-21R-A10J-07	1	771.062	129.345	3.7582	91951.1
TCGA-A8-A07S-01A-11R-A034-07	1	774.496	115.806	6.694	70066.4
TCGA-B6-A0IG-01A-11R-A034-07	1	775.353	186.847	15.3657	113950
TCGA-GM-A2DB-01A-31R-A18M-07	1	775.541	173.005	5.22	281034
TCGA-E2-A14P-01A-31R-A12D-07	1	778.534	62.0745	92.511	125496
TCGA-C8-A12X-01A-11R-A115-07	1	782.734	41.7266	1.4388	75564.7
TCGA-C8-A26W-01A-11R-A16F-07	1	788.756	162.817	13.081	104229
TCGA-A8-A06Q-01A-11R-A034-07	1	794.434	106.365	0	53761.1
TCGA-A8-A09N-01A-11R-A00Z-07	1	799.04	163.212	12.6555	81443.2
TCGA-E2-A10B-01A-11R-A10J-07	1	800	57.468	26.458	71670.3
TCGA-E2-A15P-01A-11R-A115-07	1	802.836	90.8768	12.3176	58327.6
TCGA-A8-A06N-01A-11R-A00Z-07	1	815.971	146.168	0	38033
TCGA-BH-A1FG-01A-11R-A13Q-07	1	817.189	204.661	4.37	66726.9
TCGA-E9-A1NF-01A-11R-A14D-07	1	817.901	156.026	35.9109	135899
TCGA-D8-A27V-01A-12R-A17B-07	1	821.099	179.95	71.7282	65320.1
TCGA-A8-A0A4-01A-11R-A00Z-07	1	823.049	39.6073	86.1786	79440.5
TCGA-E9-A1R4-01A-21R-A14D-07	1	831.787	282.959	71.137	95352.2
TCGA-E9-A2JT-01A-22R-A18M-07	1	835.694	116.147	16.9972	101134
TCGA-AN-A0FT-01A-11R-A034-07	1	836.55	321.335	0.8303	191104
TCGA-A2-A0T2-01A-11R-A084-07	1	838.163	53.0539	8.4708	306910
TCGA-AC-A23E-01A-11R-A157-07	1	839.193	82.8493	123.51	107518
TCGA-A8-A097-01A-11R-A034-07	1	843.066	325.489	6.5206	147077
TCGA-E2-A1IF-01A-11R-A144-07	1	843.856	152.463	34.8244	126867
TCGA-E9-A248-01A-11R-A169-07	1	844.61	51.473	13.5966	74065.4
TCGA-BH-A0BJ-01A-11R-A056-07		844.616	60.6115	19.7256	102366
TCGA-E2-A10A-01A-21R-A115-07		847.01	127.698	2.9096	80066.4
TCGA-BH-A1EO-01A-11R-A137-07		848.611	197.418	10.3001	133787
TCGA-A2-A04P-01A-31R-A034-07		852.697	209.025	6.7427	250476
TCGA-A2-A04W-01A-31R-A115-07		861.273	53.4918	13.508	248865
TCGA-E2-A1BD-01A-11R-A12P-07		864.117	235.279	21.6407	122050
TCGA-BH-A1ES-01A-11R-A137-07		864.754	352.459	18.8525	67898.4
TCGA-B6-A1KN-01A-11R-A13Q-07		865.054	353.833	12.2413	83719.6
TCGA-B6-A0IN-01A-11R-A034-07		865.731	186.726	9.9022	114933
TCGA-EW-A1P3-01A-11R-A144-07		866.778	118.729	19.5095	139506
TCGA-A8-A06T-01A-11R-A00Z-07		867.281	92.3889	2.1362	41251.1
TCGA-D8-A1XY-01A-11R-A14M-07		876.735	171.513	104.428	77495
TCGA-E9-A1RH-01A-21R-A169-07		881.77	137.975	156.054	205622
TCGA-A2-A0EQ-01A-11R-A034-07		882.487	36.4767	20.3109	106782
TCGA-BH-A0AZ-01A-21R-A12P-07		884.044	90.0815	73.7901	109585
TCGA-D8-A13Y-01A-11R-A115-07		892.551	221.951	3.2855	64166.6
TCGA-E9-A227-01A-11R-A157-07		893.036	121.079	10.9787	82691.7
TCGA-BH-A18N-01A-11R-A12D-07		893.274	242.622	3.4317	37171.9
TCGA-D8-A1X6-01A-11R-A14M-07		893.941	315.329	4.0819	86852.1
TCGA-C8-A137-01A-11R-A115-07		894.318	138.077	1.0621	97351.6
TCGA-BH-A0HQ-01A-11R-A034-07		898.847	85.0261	17.5451	106031
TCGA-A2-A0EM-01A-11R-A034-07		901.278	56.108	34.446	70621.8
TCGA-AQ-A04L-01B-21R-A10J-07		902.532	408.889	6.2016	117235
TCGA-AO-A0JJ-01A-11R-A056-07		902.773	94.7065	49.6939	78240.9
TCGA-BH-A1F8-01A-11R-A13Q-07		904.225	182.292	11.8634	82944.4
TCGA-BH-A1EN-01A-11R-A13Q-07		906.258	127.016	0	102113
TCGA-E9-A22A-01A-11R-A157-07		906.785	345.723	156.932	187623
TCGA-D8-A1XJ-01A-11R-A14M-07		909.191	87.2654	2.1137	152293
TCGA-AO-A0J9-01A-11R-A034-07		912.088	120.472	11.803	235061
TCGA-E2-A15G-01A-11R-A12D-07		917.623	142.623	3.2787	59209.4
TCGA-AN-A0FF-01A-11R-A034-07		919.481	127.726	0.3681	84893.3
TCGA-A2-A0EN-01A-13R-A084-07		920.717	83.5514	16.5121	119912
TCGA-A8-A09A-01A-11R-A00Z-07		921.613	64.3407	19.9366	54500.7
TCGA-GM-A2DH-01A-11R-A180-07		922.816	73.794	14.0808	60964.3
TCGA-A7-A26H-01A-11R-A169-07		926.893	157.702	33.1593	110645
TCGA-E2-A1BC-01A-11R-A12P-07		928.401	67.6213	27.0485	72068.4
TCGA-AR-A24V-01A-21R-A169-07		950.51	183.95	293.589	87517.6
TCGA-E9-A1RI-01A-11R-A169-07		950.651	110.593	76.1935	79370.8
TCGA-AR-A24Z-01A-11R-A169-07		954.79	155.889	0.2289	41308.2
TCGA-BH-A0HA-01A-11R-A12P-07		955.12	134.524	80.7144	110127
TCGA-BH-A0BC-01A-22R-A084-07		955.317	85.4471	9.3599	141942
TCGA-AN-A0XW-01A-11R-A109-07		956.234	87.5316	134.993	139690
TCGA-C8-A131-01A-11R-A115-07		957.17	118.383	0	224361
TCGA-A8-A06P-01A-11R-A00Z-07		957.7	219.101	26.1071	121102
TCGA-AO-A0JG-01A-31R-A084-07		960.526	137.699	11.3219	54712.4
TCGA-BH-A0H7-01A-13R-A056-07		961.589	277.741	22.3244	120351
TCGA-E2-A156-01A-11R-A12D-07		966.978	82.5556	6.4609	40651.8
TCGA-GM-A2DL-01A-11R-A18M-07		972.114	102.725	3.7697	192077
TCGA-BH-A0W7-01A-11R-A115-07		972.141	225.984	40.6771	133179
TCGA-C8-A12Y-01A-11R-A12D-07		974.04	133.389	9.1135	128452
TCGA-E9-A1NI-01A-11R-A14D-07		976.017	172.054	19.8123	100348
TCGA-AN-A0AM-01A-11R-A034-07		977.345	128.662	41.4927	115680
TCGA-B6-A0IA-01A-11R-A034-07		981.609	195.019	0.3831	183810
TCGA-A2-A1FZ-01A-51R-A14D-07		986.347	102.193	31.0302	86598.3
TCGA-E2-A15A-01A-11R-A12D-07		986.963	326.962	4.7988	85045.2
TCGA-A2-A25C-01A-11R-A169-07		989.413	83.5906	8.1606	66751
TCGA-B6-A0WV-01A-11R-A109-07		990.104	138.102	2.2492	81446.7
TCGA-E2-A15D-01A-11R-A115-07		990.893	160.07	3.1524	94508.2
TCGA-BH-A1F5-01A-12R-A13Q-07		998.158	281.872	108.327	87613.9
TCGA-A1-A0SQ-01A-21R-A144-07		999.697	82.703	7.6652	45690.4
TCGA-BH-A0BA-01A-11R-A056-07		1001.46	87.3961	42.8412	59562.7
TCGA-A2-A0YC-01A-11R-A109-07		1004.56	134.966	7.4032	61718.4
TCGA-C8-A12U-01A-11R-A115-07		1006.92	411.332	0.8651	113234
TCGA-C8-A132-01A-31R-A115-07		1007.34	138.996	12.7413	111908
TCGA-AR-A0U1-01A-11R-A115-07		1020.31	112.141	24.7241	147645
TCGA-EW-A1J3-01A-11R-A13Q-07		1020.44	190.309	4.348	102161
TCGA-AR-A24R-01A-11R-A169-07		1022.69	203.39	11.2083	62724.2
TCGA-D8-A1JI-01A-11R-A13Q-07		1027.37	96.4485	0.3858	52059.8
TCGA-E9-A1RF-01A-11R-A157-07		1030.45	126.289	15.7008	184335
TCGA-D8-A1JC-01A-11R-A13Q-07		1046.72	279.708	19.7118	75076
TCGA-AR-A0TS-01A-11R-A115-07		1048.46	45.5141	13.0976	144701
TCGA-AO-A128-01A-11R-A10J-07		1056.17	53.1886	6.5129	119817
TCGA-BH-A0BT-01A-11R-A12P-07		1057.62	100.087	20.7077	108171
TCGA-AN-A0FZ-01A-11R-A034-07		1067.3	450.371	1.7612	66171.6
TCGA-AC-A3HN-01A-11R-A213-07		1075	70.8413	72.4214	87958
TCGA-AR-A1AV-01A-21R-A12P-07		1081.8	124.345	2.0242	66163.1
TCGA-AO-A0JM-01A-21R-A056-07		1087.15	135.621	1.634	130094
TCGA-A8-A08P-01A-11R-A00Z-07		1089.26	433.052	4.423	104050
TCGA-C8-A26X-01A-31R-A16F-07		1093.25	156.178	5.9715	250399
TCGA-AN-A0FN-01A-11R-A034-07		1093.72	79.2305	71.1389	161200
TCGA-A8-A093-01A-11R-A00Z-07		1097.51	108.311	25.1963	94231.3
TCGA-D8-A1XM-01A-21R-A14M-07		1097.84	67.2468	24.789	67179.8
TCGA-AC-A2BM-01A-11R-A21T-07		1099.53	158.013	13.8002	60588.2
TCGA-BH-A0H6-01A-21R-A056-07		1105.03	286.294	72.9927	103426
TCGA-A8-A09D-01A-11R-A00Z-07		1105.85	390.537	1.6038	89736.6
TCGA-A2-A0YI-01A-31R-A10J-07		1106.14	135.957	10.4353	78210.2
TCGA-BH-A18S-01A-11R-A12D-07		1106.49	91.7717	1011.45	40482.8
TCGA-E2-A1IJ-01A-11R-A144-07		1118.18	55.2344	286.448	108192
TCGA-A8-A07E-01A-11R-A034-07		1138.11	91.1175	48.9971	91104.9
TCGA-E2-A1B5-01A-21R-A12P-07		1147.25	215.536	23.4742	104777
TCGA-C8-A26Z-01A-11R-A16F-07		1147.95	202.156	8.0863	46002.7
TCGA-AN-A0FS-01A-11R-A034-07		1151.72	56.4717	36.2128	71392.7
TCGA-AO-A12B-01A-11R-A10J-07		1152.34	140.818	0.4229	31377.5
TCGA-E9-A3Q9-01A-11R-A21T-07		1158.59	121.566	1.9544	44169.4
TCGA-A1-A0SN-01A-11R-A144-07		1158.76	171.905	36.2412	97914.7
TCGA-AR-A252-01A-11R-A169-07		1158.81	139.852	40.2963	71965
TCGA-GM-A2DN-01A-11R-A180-07		1160.82	166.602	50.135	103122
TCGA-E2-A15M-01A-11R-A12D-07		1162.95	108.086	5.1568	75829.4
TCGA-AO-A0J3-01A-11R-A034-07		1163.8	165.973	0.2485	68936
TCGA-BH-A0HI-01A-11R-A084-07		1165.01	59.4286	12.3077	85565.2
TCGA-E9-A1R0-01A-22R-A16F-07		1166.43	117.024	36.3684	65183
TCGA-AR-A24L-01A-11R-A169-07		1166.88	106.555	13.3194	57434.6
TCGA-C8-A278-01A-11R-A169-07		1178.17	82.7308	10.2998	93467.8
TCGA-C8-A1HM-01A-12R-A137-07		1185.61	222.538	9.4697	88646.8
TCGA-EW-A1IX-01A-12R-A144-07		1200.48	87.5273	189.703	91289.1
TCGA-BH-A0HF-01A-11R-A056-07		1203.58	106.448	16.9959	104950
TCGA-B6-A0IH-01A-11R-A115-07		1205.32	73.5312	38.2561	89123.3
TCGA-B6-A0RN-01A-12R-A084-07		1207.39	108.567	72.3776	75422.4
TCGA-AN-A0AL-01A-11R-A00Z-07		1211.76	87.7617	15.7005	147361
TCGA-D8-A1XA-01A-11R-A14D-07		1213.79	94.929	8.9249	67621.5
TCGA-E9-A1R5-01A-11R-A14M-07		1213.94	58.7126	65.2727	69274.6
TCGA-B6-A0IM-01A-11R-A034-07		1214.81	148.458	6.3853	61784.8
TCGA-A2-A04Y-01A-21R-A034-07		1215.12	3491.47	15.7243	143498
TCGA-D8-A1Y0-01A-11R-A14M-07		1215.17	216.617	16.8564	57963.6
TCGA-C8-A12W-01A-11R-A115-07		1222.7	223.996	29.7799	108803
TCGA-BH-A0DG-01A-21R-A12P-07		1228.62	152.17	52.9469	113526
TCGA-E9-A1RC-01A-11R-A157-07		1228.92	226.935	3.9683	73929.6
TCGA-B6-A0I8-01A-11R-A034-07		1235.75	211.744	3.7532	55672.8
TCGA-A8-A08G-01A-11R-A00Z-07		1236.71	129.126	20.6021	66211.1
TCGA-A2-A0CU-01A-12R-A034-07		1247.04	154.257	1.9091	95027.1
TCGA-B6-A0RI-01A-11R-A056-07		1249.6	181.877	10.9642	89327.6
TCGA-B6-A0IK-01A-12R-A056-07		1252.02	88.4393	8.0925	138808
TCGA-E9-A1ND-01A-11R-A144-07		1254.87	36.9813	5.4972	127489
TCGA-BH-A1EU-01A-11R-A137-07		1259.63	96.8308	13.833	51338.6
TCGA-BH-A18K-01A-11R-A12D-07		1259.67	137.406	10.9783	129192
TCGA-E2-A1IP-01A-11R-A14D-07		1263.81	101.501	6.1891	124715
TCGA-BH-A1F2-01A-31R-A13Q-07		1264.76	132.071	0.6114	103527
TCGA-D8-A1XB-01A-11R-A14D-07		1272.52	140.832	39.3233	86407.9
TCGA-E9-A3HO-01A-11R-A213-07		1272.57	359.513	19.7396	65932.8
TCGA-E2-A1IH-01A-11R-A13Q-07		1280.29	132.885	14.765	167804
TCGA-E2-A1IU-01A-11R-A14D-07		1280.99	65.776	15.6218	48393.8
TCGA-A7-A2KD-01A-31R-A21T-07		1288.32	141.723	37.0988	44337.4
TCGA-B6-A0RL-01A-11R-A084-07		1289.23	133.846	1.5385	49197.2
TCGA-BH-A18I-01A-11R-A12D-07		1296.65	280.219	53.9602	91789.8
TCGA-A2-A0YT-01A-11R-A109-07		1303.22	306.655	10.5185	108032
TCGA-E2-A15O-01A-11R-A115-07		1303.8	166.066	2.0604	58668.2
TCGA-GM-A2DA-01A-11R-A18M-07		1304.02	528.773	36.9164	150693
TCGA-C8-A3M8-01A-11R-A213-07		1304.27	119.467	0	85747.2
TCGA-E2-A14Q-01A-11R-A12D-07		1314.64	99.2366	36.1766	102349
TCGA-D8-A1JH-01A-11R-A13Q-07		1329.76	110.368	50.4684	74191.3
TCGA-BH-A0BV-01A-11R-A00Z-07		1334.23	95.9325	16.1167	99598.2
TCGA-A7-A3J1-01A-11R-A213-07		1334.78	179.493	53.4327	56575.1
TCGA-A8-A07I-01A-11R-A00Z-07		1335.24	126.557	5.7326	100524
TCGA-E9-A1N9-01A-11R-A14D-07		1335.36	150.95	11.8214	56130.8
TCGA-B6-A0X7-01A-11R-A10J-07		1342.6	181.256	17.851	75869.6
TCGA-E9-A243-01A-21R-A169-07		1343.06	66.2777	23.3372	79414.2
TCGA-BH-A0DZ-01A-11R-A00Z-07		1343.22	209.322	10.1695	112065
TCGA-BH-A203-01A-12R-A169-07		1345.04	158.81	7.8867	142409
TCGA-A8-A07L-01A-11R-A00Z-07		1356.41	245.716	2.0562	54115.5
TCGA-EW-A1PA-01A-11R-A144-07		1358.98	78.7746	9.6741	64100.4
TCGA-B6-A0IE-01A-11R-A034-07		1362.38	628.869	29.6097	107295
TCGA-B6-A0RP-01A-21R-A084-07		1366.89	119.412	28.8434	78847.1
TCGA-AN-A041-01A-11R-A034-07		1374.83	423.639	36.1886	76499.3
TCGA-AR-A1AS-01A-11R-A12P-07		1383.61	149.032	0	129542
TCGA-BH-A0HU-01A-11R-A034-07		1384.19	399.228	12.0978	124743
TCGA-BH-A0HB-01A-11R-A056-07		1384.51	260.641	6.2171	121406
TCGA-A8-A082-01A-11R-A00Z-07		1388.8	162.4	1242.4	72642.8
TCGA-D8-A1XW-01A-11R-A14M-07		1389.21	68.6179	0.301	77524.9
TCGA-E2-A15L-01A-11R-A12D-07		1400.43	119.308	5.1041	90383.3
TCGA-EW-A1PF-01A-11R-A144-07		1404.1	156.531	19.0716	107457
TCGA-AO-A0JE-01A-11R-A056-07		1411.36	172.82	39.3509	105047
TCGA-A7-A26F-01A-21R-A169-07		1411.81	66.3089	22.421	112833
TCGA-B6-A0WX-01A-11R-A109-07		1415.67	271.529	231.709	158622
TCGA-AN-A0FK-01A-11R-A034-07		1422.16	126.547	13.3991	92967
TCGA-A8-A06U-01A-11R-A00Z-07		1423.18	199.144	8.168	58862.3
TCGA-BH-A0DX-01A-11R-A115-07		1426.5	90.8076	26.7957	136918
TCGA-AR-A0U3-01A-11R-A109-07		1426.7	189.39	2.2818	66912.2
TCGA-A7-A26I-01A-11R-A169-07		1435.96	57.8147	22.4066	114588
TCGA-BH-A0HP-01A-12R-A084-07		1439.65	104.281	34.7602	82273.6
TCGA-AQ-A1H3-01A-31R-A13Q-07		1442.6	132.369	32.2509	79521.1
TCGA-AR-A2LM-01A-11R-A180-07		1444.42	95.5642	74.8688	79965.9
TCGA-A2-A0D4-01A-11R-A00Z-07		1444.66	631.272	3.9937	53890.8
TCGA-BH-A0AU-01A-11R-A12P-07		1460.29	206.679	52.3466	64695.8
TCGA-A8-A07P-01A-11R-A00Z-07		1460.61	80.5114	8.6386	63346.9
TCGA-E9-A245-01A-22R-A16F-07		1461.54	186.309	14.1143	42554
TCGA-A2-A04N-01A-11R-A115-07		1467.91	302.694	53.4865	105202
TCGA-C8-A12Z-01A-11R-A115-07		1468.22	94.8986	4.4253	145698
TCGA-A8-A096-01A-11R-A00Z-07		1468.34	125.601	20.0627	85980.4
TCGA-B6-A0RV-01A-11R-A084-07		1469.76	141.129	46.7742	113174
TCGA-AC-A2FF-01A-11R-A17B-07		1471.18	108.213	57.649	68203.9
TCGA-E2-A1L6-01A-11R-A13Q-07		1471.29	134.009	29.6065	90517.5
TCGA-E2-A1L8-01A-11R-A13Q-07		1473.4	171.128	15.2491	106493
TCGA-E2-A15E-06A-11R-A12D-07		1476.84	93.7853	3.3898	71545.8
TCGA-BH-A0AY-01A-21R-A00Z-07		1480.66	192.96	1.3038	150623
TCGA-AN-A0FL-01A-11R-A034-07		1481.35	187.471	4.1456	135544
TCGA-D8-A1XD-01A-11R-A14D-07		1485.95	190.226	36.2961	58419.2
TCGA-EW-A1PC-01B-11R-A21T-07		1500	152.399	7.5259	58051.3
TCGA-C8-A12T-01A-11R-A115-07		1503.59	136.892	17.3337	130116
TCGA-AO-A1KP-01A-11R-A13Q-07		1511.3	440.657	15.5838	114311
TCGA-AR-A0TY-01A-12R-A115-07		1515.96	437.923	2.2573	89643.7
TCGA-AO-A0JC-01A-11R-A056-07		1516.64	229.422	24.0806	163309
TCGA-BH-A0E0-01A-11R-A056-07		1525.29	106.642	1.2188	134584
TCGA-BH-A1FR-01A-11R-A13Q-07		1526.68	163.485	1.9579	47725.4
TCGA-A2-A25B-01A-11R-A169-07		1526.68	402.429	17.2273	81978
TCGA-BH-A0DO-01B-11R-A12D-07		1531.41	140.979	12.7831	57216.9
TCGA-A2-A1G4-01A-11R-A13Q-07		1532.03	233.779	23.5697	68015.6
TCGA-E9-A1QZ-01A-21R-A169-07		1532.14	78.0804	28.8624	78491.4
TCGA-BH-A0BM-01A-11R-A056-07		1535.67	75.7962	74.5223	105068
TCGA-BH-A0BL-01A-11R-A115-07		1541.97	39.8184	13.3741	121141
TCGA-GM-A2DC-01A-11R-A18M-07		1545.62	664.752	7.6597	53426.9
TCGA-E2-A1IN-01A-11R-A13Q-07		1547.96	179.564	140.054	130022
TCGA-E2-A14Z-01A-11R-A115-07		1548.43	252.018	8.0717	207070
TCGA-AO-A12D-01A-11R-A115-07		1548.96	84.5849	54.3073	139885
TCGA-BH-A0BD-01A-11R-A034-07		1551.99	122.629	7.1942	105657
TCGA-E9-A228-01A-31R-A157-07		1552.4	76.0643	0.5762	48608.5
TCGA-AN-A0AK-01A-21R-A00Z-07		1552.48	263.644	0.4198	69111.7
TCGA-A8-A09M-01A-11R-A00Z-07		1552.77	398.328	2.8452	56148.3
TCGA-A8-A07F-01A-11R-A00Z-07		1554.95	82.5515	12.9763	68400.9
TCGA-BH-A0B1-01A-12R-A056-07		1558.49	118.107	14.9031	76821.5
TCGA-A7-A3IY-01A-21R-A21T-07		1560.32	121.906	1577.44	87550.6
TCGA-A1-A0SJ-01A-11R-A084-07		1566.71	108.642	16.0951	84372
TCGA-BH-A0E6-01A-11R-A034-07		1571.5	117.757	14.486	156495
TCGA-GM-A2DD-01A-11R-A180-07		1573.73	109.704	42.3072	231549
TCGA-AO-A12G-01A-11R-A10J-07		1585.6	177.6	8	67723.2
TCGA-BH-A18U-01A-21R-A12D-07		1585.65	243.757	33.7671	88531.1
TCGA-D8-A1XG-01A-11R-A14D-07		1587.33	161.672	298.977	55021.5
TCGA-A2-A0YD-01A-11R-A109-07		1597.55	141.396	19.3252	117870
TCGA-E2-A15A-06A-11R-A12D-07		1598.24	302.731	6.6935	93079.8
TCGA-AO-A03U-01B-21R-A10J-07		1602.38	64.083	26.2435	99283.2
TCGA-BH-A0DI-01A-21R-A12P-07		1606.73	73.8629	53.9448	98137.2
TCGA-AO-A03M-01B-11R-A10J-07		1607.91	104.504	7.4836	107419
TCGA-E2-A1IG-01A-11R-A144-07		1608.2	142.103	25.9846	92218.8
TCGA-AN-A0FW-01A-11R-A034-07		1610.42	209.919	11.8528	88255.5
TCGA-A2-A0D3-01A-11R-A115-07		1610.83	214.412	11.6073	77854.3
TCGA-A8-A09B-01A-11R-A00Z-07		1623.09	129.569	12.8872	143595
TCGA-E2-A1IO-01A-11R-A144-07		1637.01	121.617	54.5051	83972
TCGA-BH-A0C3-01A-21R-A12P-07		1637.48	56.6836	26.2267	66224.2
TCGA-BH-A0B5-01A-11R-A12P-07		1642.76	136.758	15.6771	87707.1
TCGA-AO-A03T-01A-21R-A034-07		1644.43	722.972	42.679	251743
TCGA-D8-A140-01A-11R-A115-07		1655.42	114.992	12.9513	41516.9
TCGA-A8-A08F-01A-11R-A00Z-07		1660.18	247.795	0.8501	64337.9
TCGA-EW-A1J5-01A-11R-A13Q-07		1660.79	158.947	10.7895	69805
TCGA-EW-A1P7-01A-21R-A144-07		1666.8	71.1921	190.397	181120
TCGA-E2-A1IE-01A-11R-A13Q-07		1674.74	154.469	0.9966	53891.5
TCGA-A8-A08Z-01A-21R-A00Z-07		1675.59	81.9191	21.5405	104691
TCGA-A8-A090-01A-11R-A00Z-07		1676.74	121.623	6.7777	62952.1
TCGA-BH-A1FH-01A-12R-A13Q-07		1679.08	70.5937	31.891	78762.1
TCGA-BH-A0W5-01A-11R-A109-07		1683.93	291.59	38.8786	88568.6
TCGA-C8-A1HN-01A-11R-A137-07		1691.71	480.443	0.5277	83385.5
TCGA-AR-A24U-01A-11R-A169-07		1699.8	200.6	4.9653	143460
TCGA-AN-A0G0-01A-11R-A034-07		1702.06	135.708	0.5862	106338
TCGA-A2-A0CP-01A-11R-A034-07		1703.08	266.756	37.5335	169311
TCGA-B6-A0WS-01A-11R-A115-07		1703.32	109.284	56.8688	90748.2
TCGA-C8-A12P-01A-11R-A115-07		1707.68	354.987	32.8621	157460
TCGA-A8-A075-01A-11R-A084-07		1713.88	343.492	1.0757	117898
TCGA-C8-A134-01A-11R-A115-07		1717.07	90.8513	163.278	190768
TCGA-A2-A1FX-01A-11R-A13Q-07		1721.48	248.324	5.6868	52768.3
TCGA-A2-A0YF-01A-21R-A109-07		1727.68	132.837	2.3911	80289.1
TCGA-A7-A26G-01A-21R-A169-07		1741.34	118.006	32.3078	85575.2
TCGA-AC-A2B8-01A-11R-A17B-07		1744.02	201.31	12.3457	91032.2
TCGA-A2-A04V-01A-21R-A034-07		1749.44	230.597	2.8519	113591
TCGA-GM-A2DF-01A-11R-A180-07		1765.06	110.442	5.5221	223361
TCGA-D8-A27F-01A-11R-A16F-07		1765.58	43.3205	4.8736	76822.8
TCGA-EW-A1J2-01A-21R-A13Q-07		1766.37	104.45	19.8355	73059.1
TCGA-E9-A295-01A-11R-A16F-07		1767.96	243.873	37.1846	72989.5
TCGA-BH-A0E1-01A-11R-A056-07		1771.78	145.306	49.8871	60615.6
TCGA-AR-A0TP-01A-11R-A084-07		1771.9	229.906	0	133594
TCGA-A2-A0T7-01A-21R-A084-07		1773.38	175.345	22.2431	131385
TCGA-A1-A0SF-01A-11R-A144-07		1777.45	150.798	38.5563	126442
TCGA-AO-A03L-01A-41R-A056-07		1777.93	147.5	17.1972	76955
TCGA-A2-A0CL-01A-11R-A115-07		1779.1	181.987	35.5819	93596
TCGA-AN-A0AS-01A-11R-A00Z-07		1780.13	194.638	113.088	131482
TCGA-BH-A18F-01A-11R-A12D-07		1782.27	103.178	16.477	90412.3
TCGA-EW-A2FV-01A-11R-A17B-07		1782.36	193.296	22.7742	107747
TCGA-BH-A0B3-01A-11R-A056-07		1788.27	125.924	117.478	187519
TCGA-BH-A0BP-01A-11R-A115-07		1788.87	244.233	40.6219	104459
TCGA-AC-A2FG-01A-11R-A17B-07		1789.58	81.3682	47.4216	72898.2
TCGA-GM-A2DK-01A-21R-A180-07		1790.59	132.936	12.8648	121104
TCGA-AR-A24O-01A-11R-A169-07		1800.41	109.98	37.3388	91665
TCGA-AO-A0JL-01A-11R-A056-07		1803.41	270.817	0	253793
TCGA-BH-A0H9-01A-11R-A056-07		1805.49	444.14	13.2929	92526.6
TCGA-AR-A255-01A-11R-A169-07		1810.99	248.603	26.3811	61552.1
TCGA-E9-A22B-01A-11R-A157-07		1837.16	231.561	10.2206	85933.6
TCGA-D8-A1JL-01A-11R-A13Q-07		1845.14	78.9586	5.1335	124073
TCGA-EW-A1J1-01A-11R-A13Q-07		1847.29	208.855	3.2082	83308.3
TCGA-E2-A14R-01A-11R-A115-07		1853.95	161.871	8.254	114434
TCGA-BH-A1FU-01A-11R-A14D-07		1858.38	55.4353	40.7103	129475
TCGA-AN-A049-01A-21R-A00Z-07		1863.62	285.592	7.2681	110865
TCGA-A8-A08O-01A-21R-A056-07		1868.58	92.0546	17.4945	57811.5
TCGA-A8-A0A2-01A-11R-A034-07		1870.5	164.897	48.0826	86353.7
TCGA-AR-A24Q-01A-12R-A169-07		1886.46	108.879	31.7322	122093
TCGA-AO-A1KS-01A-11R-A13Q-07		1887.47	199.95	8.9234	50423.9
TCGA-E9-A1N4-01A-11R-A14M-07		1890.39	93.508	7.8951	84238.4
TCGA-E2-A14W-01A-11R-A12D-07		1896.5	292.286	7.1874	88149
TCGA-E2-A14S-01A-11R-A12D-07		1905.58	345.085	1.553	67024.7
TCGA-E9-A2JS-01A-11R-A180-07		1913.48	367.115	14.8225	45367.8
TCGA-AN-A0XN-01A-21R-A109-07		1920.3	194.272	61.2702	147143
TCGA-D8-A1JD-01A-11R-A13Q-07		1930.52	339.982	43.8921	72032.5
TCGA-BH-A1EW-01A-11R-A137-07		1937.46	171.819	15.4565	62096.3
TCGA-AN-A0XT-01A-11R-A109-07		1940.47	266.178	4.3141	40996.1
TCGA-AO-A12A-01A-21R-A115-07		1948.48	126.578	71.9891	86596.7
TCGA-D8-A1XV-01A-11R-A14M-07		1952.09	183.411	178.259	32707.9
TCGA-A8-A07C-01A-11R-A034-07		1958.24	35.1064	1.5957	46835.9
TCGA-EW-A1OZ-01A-11R-A144-07		1967.76	285.197	2.414	110677
TCGA-BH-A0B7-01A-12R-A115-07		1972.48	132.237	30.0214	141622
TCGA-A7-A26J-01A-11R-A169-07		1976.22	172.542	37.1543	57859.7
TCGA-C8-A12L-01A-11R-A115-07		1978.63	93.3914	4.353	104027
TCGA-E2-A150-01A-11R-A12D-07		1978.96	159.45	4.0469	101380
TCGA-E9-A1R6-01A-11R-A14D-07		1980.52	163.827	14.9597	74473.1
TCGA-A7-A13F-01A-11R-A12P-07		1987.95	161.446	2.008	104389
TCGA-BH-A0WA-01A-11R-A109-07		1990.56	106.387	34.5501	132696
TCGA-D8-A27M-01A-11R-A16F-07		2003.08	294.027	12.0074	79679.8
TCGA-BH-A204-01A-11R-A157-07		2015.66	570.877	0	42814
TCGA-EW-A1J6-01A-11R-A13Q-07		2019.32	217.15	1.8172	89025.7
TCGA-A8-A08B-01A-11R-A00Z-07		2022.08	461.131	3.5336	85361.3
TCGA-D8-A27T-01A-11R-A16F-07		2027.7	149.242	92.5298	82793.6
TCGA-E2-A106-01A-11R-A10J-07		2030.06	298.443	3.6219	67813.5
TCGA-AR-A24T-01A-11R-A169-07		2038.81	66.672	31.8866	87809.6
TCGA-BH-A0EA-01A-11R-A115-07		2044.74	99.0549	40.6747	80158.9
TCGA-D8-A145-01A-11R-A115-07		2049.64	119.048	31.477	60627.9
TCGA-C8-A130-01A-31R-A115-07		2050.47	482.732	6.0721	137787
TCGA-AR-A1AN-01A-11R-A12P-07		2051.26	121.538	15.9281	82507.9
TCGA-BH-A0DD-01A-31R-A12P-07		2055.67	200.63	2.8011	52212.5
TCGA-A2-A0CV-01A-31R-A115-07		2062.42	142.404	20.0569	125812
TCGA-AO-A0J2-01A-11R-A034-07		2062.69	86.3371	2.5645	147713
TCGA-B6-A2IU-01A-32R-A18M-07		2066.86	109.274	4.3134	56362.3
TCGA-BH-A0E9-01B-11R-A115-07		2067.42	113.952	44.9438	65856.5
TCGA-A8-A09X-01A-11R-A00Z-07		2073.06	62.5065	14.4883	107250
TCGA-BH-A0B4-01A-11R-A00Z-07		2083.53	411.325	12.8139	84212
TCGA-C8-A12O-01A-11R-A115-07		2089.85	174.569	15.2881	109929
TCGA-AO-A03V-01A-11R-A115-07		2092.16	248.627	7.451	77789.4
TCGA-D8-A1Y1-01A-21R-A14M-07		2097.38	248.729	32.5589	140724
TCGA-B6-A0RQ-01A-11R-A115-07		2102.4	96.2813	20.1231	82965.7
TCGA-E9-A247-01A-11R-A169-07		2106.2	222.735	5.1799	58291
TCGA-A2-A0YK-01A-22R-A109-07		2109.85	76.2161	41.1784	82942.2
TCGA-A2-A0SU-01A-11R-A084-07		2111.92	38.743	9.901	78372.4
TCGA-A2-A25F-01A-11R-A169-07		2114.86	77.5174	4.8931	127988
TCGA-AO-A1KR-01A-12R-A144-07		2115.72	2715.72	24.7492	136621
TCGA-D8-A1XQ-01A-11R-A14M-07		2120.36	87.2987	14.8837	123087
TCGA-E2-A155-01A-11R-A12D-07		2141.94	153.5	0	64486.4
TCGA-B6-A0IO-01A-11R-A034-07		2141.95	230.282	5.5926	88150
TCGA-A1-A0SE-01A-11R-A084-07		2149.57	108.597	175.072	85495.4
TCGA-BH-A0H5-01A-21R-A115-07		2153.66	113.271	68.4897	100947
TCGA-AN-A04C-01A-21R-A034-07		2155.7	419.223	2.128	155363
TCGA-AO-A1KT-01A-11R-A13Q-07		2157.85	340.349	19.8437	159866
TCGA-A8-A0A9-01A-11R-A00Z-07		2162.57	238.137	4.6866	107742
TCGA-BH-A201-01A-11R-A14M-07		2169.24	105.562	49.7123	91195.7
TCGA-AC-A3OD-01A-11R-A21T-07		2171.23	107.221	21.8044	57172.2
TCGA-BH-A0AV-01A-31R-A115-07		2180.32	118.536	7.0517	166483
TCGA-AN-A0AJ-01A-11R-A00Z-07		2187.07	225.196	2.6916	137649
TCGA-A8-A06X-01A-21R-A00Z-07		2193.74	187.283	14.4064	136907
TCGA-BH-A18H-01A-11R-A12D-07		2199.28	290.373	15.0104	87355.1
TCGA-A7-A0D9-01A-31R-A056-07		2199.67	336.352	14.8209	85494.4
TCGA-BH-A18M-01A-11R-A12D-07		2210.85	254.547	41.5063	98848.5
TCGA-A1-A0SD-01A-11R-A115-07		2210.9	156.48	36.3907	79911.7
TCGA-E9-A1RE-01A-11R-A157-07		2212.66	430.572	0.2917	40072.9
TCGA-A8-A09K-01A-11R-A00Z-07		2214.07	288.516	3.3745	31731.7
TCGA-EW-A1P6-01A-11R-A144-07		2216.17	350.84	33.3377	71771.9
TCGA-E2-A10F-01A-11R-A10J-07		2222.14	168.559	35.2375	101357
TCGA-A2-A0ET-01A-31R-A034-07		2225.89	98.8624	0.2709	48078.8
TCGA-B6-A0RG-01A-11R-A056-07		2230.74	161.081	6.6058	93823.8
TCGA-E2-A1B1-01A-21R-A12P-07		2231.08	120.594	38.3037	68746.5
TCGA-BH-A0HW-01A-11R-A034-07		2237.63	172.719	0.5935	28248.4
TCGA-A2-A0T6-01A-11R-A084-07		2239.72	76.7836	44.1354	100794
TCGA-A2-A1FW-01A-11R-A13Q-07		2242.27	732.587	8.308	44646.2
TCGA-D8-A1XC-01A-11R-A14D-07		2249.78	145.704	248.007	34633.7
TCGA-E2-A1IK-01A-11R-A144-07		2251.11	110	162.778	58953.3
TCGA-AR-A1AH-01A-11R-A12D-07		2252.06	59.0263	3.6891	90584.6
TCGA-AR-A24P-01A-11R-A169-07		2272.53	110.806	24.5913	69674.8
TCGA-AO-A0JD-01A-11R-A056-07		2277.11	72.9941	1.8813	78085.6
TCGA-AO-A03O-01A-11R-A00Z-07		2286.9	273.362	7.8603	89366.8
TCGA-A8-A0AB-01A-11R-A034-07		2289.26	113.935	2.5777	63556.2
TCGA-EW-A1IW-01A-11R-A13Q-07		2291.61	63.132	15.8513	96648.3
TCGA-E2-A14T-01A-11R-A115-07		2298.86	376.429	2.4496	87395.5
TCGA-A8-A07B-01A-11R-A00Z-07		2300.93	166.526	19.4421	38621.3
TCGA-BH-A2L8-01A-11R-A18M-07		2306.94	151.834	33.7408	109455
TCGA-BH-A0H0-01A-11R-A056-07		2313.4	337.213	4.0369	94878.8
TCGA-BH-A0DL-01A-11R-A115-07		2314.7	281.655	3.0883	102236
TCGA-AN-A0XU-01A-11R-A109-07		2316.68	166.781	14.8174	64056.9
TCGA-B6-A0RM-01A-11R-A084-07		2317.58	458.018	2.7843	47231.2
TCGA-A2-A0YH-01A-11R-A109-07		2319.11	207.184	76.9845	99464.3
TCGA-EW-A1OW-01A-21R-A144-07		2336.65	77.2645	166.527	105240
TCGA-AO-A129-01A-21R-A10J-07		2336.68	245.56	11.1969	190170
TCGA-A2-A0SY-01A-31R-A084-07		2342.86	119.512	26.4808	110200
TCGA-BH-A0C0-01A-21R-A056-07		2350.39	295.569	1.3705	111239
TCGA-E2-A15S-01A-11R-A115-07		2351.4	596.981	2.3005	32355.7
TCGA-GM-A2DI-01A-31R-A18M-07		2353.64	94.1456	43.5127	131697
TCGA-A8-A079-01A-21R-A00Z-07		2361.03	396.442	1.0165	62211.6
TCGA-E2-A14V-01A-11R-A12D-07		2363.41	232.386	7.2518	147695
TCGA-AR-A0TT-01A-31R-A084-07		2373.57	163.132	4.4861	106683
TCGA-A2-A0CZ-01A-11R-A034-07		2374.76	85.2381	95.7143	122818
TCGA-D8-A141-01A-11R-A115-07		2380.53	160.313	17.3587	125754
TCGA-BH-A1FB-01A-11R-A13Q-07		2380.98	120.927	57.5286	78613.7
TCGA-AR-A1AO-01A-11R-A12P-07		2384.89	68.3368	78.193	103365
TCGA-AO-A12H-01A-11R-A115-07		2388.22	221.089	10.528	54965
TCGA-AC-A2QH-01A-11R-A18M-07		2388.29	272.053	0	137864
TCGA-D8-A1XK-01A-21R-A14M-07		2389.79	121.92	2.1723	48206.6
TCGA-E9-A22G-01A-11R-A157-07		2397.89	107.906	1.8658	80453.7
TCGA-BH-A0DP-01A-21R-A056-07		2409.34	107.587	38.5769	117260
TCGA-B6-A0WY-01A-11R-A109-07		2415.81	348.912	14.0845	81837.7
TCGA-A2-A04Q-01A-21R-A034-07		2423.06	215.58	30.081	164528
TCGA-GI-A2C9-01A-11R-A21T-07		2424.44	148.272	16.6973	92465.2
TCGA-D8-A1XS-01A-11R-A14M-07		2424.68	370.015	12.8599	60631.3
TCGA-BH-A0E2-01A-11R-A056-07		2425.43	283.36	3.1397	112110
TCGA-BH-A0DE-01A-11R-A115-07		2436.17	163.29	15.1712	89435.7
TCGA-AR-A251-01A-12R-A169-07		2441.38	257.027	80.6469	49413.8
TCGA-A2-A1G1-01A-21R-A13Q-07		2474.61	82.7435	5.7728	150586
TCGA-A2-A3KD-01A-12R-A213-07		2482.4	163.655	497.191	81359.9
TCGA-BH-A28Q-01A-11R-A16F-07		2491.33	172.704	7.5747	63782
TCGA-EW-A2FS-01A-11R-A17B-07		2496.48	447.534	13.3482	130458
TCGA-AR-A1AX-01A-11R-A12P-07		2501.32	293.762	50.6616	80582.6
TCGA-AR-A24X-01A-11R-A169-07		2517.28	181.244	59.4323	62986.9
TCGA-A2-A0EU-01A-22R-A056-07		2519.48	142.642	12.3173	65184.3
TCGA-AC-A2BK-01A-11R-A21T-07		2521.59	181.964	0.3198	50627.1
TCGA-BH-A0HO-01A-11R-A034-07		2524.89	104.921	4.2421	47105.2
TCGA-BH-A0GY-01A-11R-A056-07		2528.4	517.133	29.3057	161517
TCGA-A2-A25A-01A-12R-A16F-07		2537.59	120.018	41.2138	105548
TCGA-E2-A15H-01A-11R-A12D-07		2538.43	368.612	8.0483	110223
TCGA-A8-A08C-01A-11R-A00Z-07		2541.48	119.878	1.0159	44715.9
TCGA-AO-A1KQ-01A-11R-A13Q-07		2563.24	882.547	7.318	112331
TCGA-E9-A1N5-01A-11R-A14D-07		2587.94	233.161	3.4506	85457.4
TCGA-AR-A2LL-01A-11R-A180-07		2594.58	414.801	28.8809	80343.7
TCGA-BH-A0H3-01A-11R-A12P-07		2599.55	83.898	42.2717	69489.2
TCGA-E2-A15R-01A-11R-A115-07		2602.75	110.148	3.7738	43154
TCGA-AO-A12C-01A-11R-A10J-07		2602.93	252.441	13.9307	87832.2
TCGA-E2-A108-01A-13R-A10J-07		2606.01	143.168	37.6303	144760
TCGA-A8-A08H-01A-21R-A00Z-07		2606.97	55.24	15.5919	140701
TCGA-BH-A1FE-01A-11R-A13Q-07		2610.46	344.758	20.2007	101417
TCGA-E9-A249-01A-11R-A169-07		2632.03	145.315	11.0767	72317
TCGA-E2-A1LI-01A-12R-A157-07		2634.01	85.637	5.7091	246005
TCGA-A2-A0D2-01A-21R-A034-07		2637.59	85.012	9.2404	139511
TCGA-EW-A1PH-01A-11R-A14M-07		2650.94	118.156	53.6744	97055.1
TCGA-AO-A124-01A-11R-A10J-07		2659.22	81.025	2.5768	231172
TCGA-BH-A0W4-01A-11R-A109-07		2681.33	183.175	19.2141	85300.2
TCGA-AR-A2LH-01A-31R-A18M-07		2681.91	105.153	21.0305	113632
TCGA-E2-A153-01A-12R-A12D-07	4	2691.32	213.014	110.122	134115
TCGA-AR-A0U0-01A-11R-A109-07	4	2695.11	245.01	62.2309	89076.3
TCGA-A2-A1G6-01A-11R-A13Q-07	4	2705.14	105.737	54.036	91403.6
TCGA-BH-A1F0-01A-11R-A137-07	4	2705.45	72.2658	24.5188	96952.8
TCGA-D8-A147-01A-11R-A115-07	4	2715.29	80.1672	2.0126	59950.6
TCGA-E9-A1N3-01A-12R-A157-07	4	2728.21	150.079	2.2568	27945.9
TCGA-E9-A1NA-01A-11R-A144-07	4	2731.91	175.016	26.5925	99000.9
TCGA-E9-A1NE-01A-21R-A14M-07	4	2743.03	166.867	36.3102	71331.7
TCGA-B6-A1KC-01B-11R-A157-07	4	2747.58	141.199	0.3224	31533.5
TCGA-A8-A085-01A-11R-A00Z-07	4	2747.91	179.18	2.9017	55182.4
TCGA-B6-A0X4-01A-11R-A109-07	4	2749.11	288.666	1.771	36961
TCGA-C8-A1HG-01A-11R-A137-07	4	2755.13	771.261	18.3284	75033.7
TCGA-BH-A0BF-01A-21R-A12P-07	4	2758.36	287.393	80.131	117636
TCGA-A7-A3J0-01A-11R-A213-07	4	2760.91	275.239	662.277	40076.4
TCGA-AO-A12E-01A-11R-A10J-07	4	2761.75	99.7268	67.4863	89356.8
TCGA-AN-A0XL-01A-11R-A10J-07	4	2768.83	199.859	2.2456	71045.3
TCGA-E2-A1B0-01A-11R-A12P-07	4	2779.8	162.644	5.9413	116230
TCGA-BH-A18V-06A-11R-A213-07	4	2784.29	128.921	8.4205	109880
TCGA-A8-A086-01A-11R-A00Z-07	4	2786.78	343.152	15.0012	68695.4
TCGA-E2-A15E-01A-11R-A12D-07	4	2799.6	160.931	22.2672	77865.4
TCGA-A2-A0EO-01A-11R-A034-07	4	2805.6	140.961	80.703	119957
TCGA-A2-A0T4-01A-31R-A084-07	4	2812.59	61.4934	13.6652	88740.4
TCGA-C8-A1HO-01A-11R-A13Q-07	4	2824.49	440.469	8.9451	42345.8
TCGA-A2-A04T-01A-21R-A034-07	4	2826.74	178.041	4.1728	121000
TCGA-A8-A07U-01A-11R-A034-07	4	2831.47	161.97	9.5982	107160
TCGA-AC-A2FO-01A-11R-A180-07	4	2838.63	101.241	40.7292	67807.2
TCGA-A7-A0CJ-01A-21R-A00Z-07	4	2845.17	312.482	1.887	57210.3
TCGA-AC-A2FK-01A-12R-A180-07	4	2846.6	79.5909	104.491	57603.4
TCGA-AC-A2FB-01A-11R-A17B-07	4	2860.2	84.2856	23.6648	79340.6
TCGA-A7-A0CE-01A-11R-A00Z-07	4	2869.73	55.5979	6.1022	136067
TCGA-AR-A1AQ-01A-11R-A12P-07	4	2872.42	219.525	11.8802	82623.5
TCGA-BH-A0BQ-01A-21R-A115-07	4	2874.59	99.8641	69.5315	119485
TCGA-AN-A046-01A-21R-A034-07	4	2882.62	188.565	7.9515	138885
TCGA-D8-A1Y2-01A-11R-A157-07	4	2898.45	204.433	19.5171	128844
TCGA-A8-A07R-01A-21R-A034-07	4	2907.26	114.646	4.8019	152869
TCGA-AR-A0U2-01A-11R-A109-07	4	2917.13	897.124	5.8919	45614.1
TCGA-AR-A0TQ-01A-11R-A084-07	4	2929.67	324.029	18.8834	80346.5
TCGA-E2-A105-01A-11R-A10J-07	4	2934.62	838.782	6.7308	34527.9
TCGA-D8-A27E-01A-11R-A16F-07	4	2941.47	130.732	4.8953	31135.3
TCGA-AN-A03X-01A-21R-A00Z-07	4	2955.83	124.382	144.156	150771
TCGA-EW-A1PD-01A-11R-A144-07	4	2959.95	229.558	9.4524	60716.8
TCGA-BH-A0DV-01A-21R-A12P-07	4	2962.58	42.2588	33.3309	117919
TCGA-AR-A2LQ-01A-22R-A18M-07	4	2970.53	49.6103	15.9127	98340.3
TCGA-AO-A12F-01A-11R-A115-07	4	2976.78	258.273	8.8473	124788
TCGA-D8-A1JB-01A-11R-A13Q-07	4	2979.68	159.425	25.1487	69525.9
TCGA-C8-A12V-01A-11R-A115-07	4	2989.05	182.076	12.1655	112787
TCGA-BH-A0DK-01A-21R-A056-07	4	3000	172.817	27.4527	123935
TCGA-B6-A0I6-01A-11R-A034-07	4	3003.11	208.856	29.4422	72628.9
TCGA-A2-A04U-01A-11R-A115-07	4	3018.57	240.551	4.1564	170972
TCGA-E2-A15J-01A-11R-A12P-07	4	3030.39	214.841	1.7668	92045.9
TCGA-B6-A0X1-01A-11R-A109-07	4	3032.48	180.459	1.0871	66615
TCGA-BH-A0DT-01A-21R-A12D-07	4	3045.41	177.23	22.8309	95209.1
TCGA-E2-A1L7-01A-11R-A144-07	4	3066.84	512.92	12.1315	61407.3
TCGA-A7-A0DA-01A-31R-A115-07	4	3067.6	163.32	220.883	128226
TCGA-AN-A04A-01A-21R-A034-07	4	3096.64	227.591	8.7535	160333
TCGA-A2-A1G0-01A-11R-A13Q-07	4	3113.08	195.924	87.7712	71865.5
TCGA-A2-A0CX-01A-21R-A00Z-07	4	3121.38	198.567	20.1796	117509
TCGA-A8-A06Y-01A-21R-A00Z-07	4	3143.18	57.5629	0	59604.5
TCGA-E2-A109-01A-11R-A10J-07	4	3165.51	524.711	8.622	53903.6
TCGA-AQ-A04J-01A-02R-A034-07	4	3167.57	101.238	37.4484	186493
TCGA-AR-A1AK-01A-21R-A12P-07	4	3186.24	251.878	41.123	70469.4
TCGA-A8-A08X-01A-21R-A00Z-07	4	3194.98	99.0924	66.6622	149696
TCGA-AR-A254-01A-21R-A169-07	4	3216.45	537.964	13.6598	98819.2
TCGA-E9-A1R2-01A-11R-A14D-07	4	3221.25	392.824	17.0193	54117.8
TCGA-AR-A1AY-01A-21R-A12P-07	4	3226.23	76.7888	5.8786	112878
TCGA-C8-A133-01A-32R-A12D-07	4	3233.5	116.395	1.3227	33467.6
TCGA-AR-A1AL-01A-21R-A12P-07	4	3237.41	95.1241	49.1581	74421.2
TCGA-E2-A1LS-01A-12R-A157-07	4	3239.24	41.5415	0	195170
TCGA-BH-A0C1-01B-11R-A12D-07	4	3249.2	155.964	24.0706	125626
TCGA-AO-A0JI-01A-21R-A056-07	4	3258.24	170.769	4.1651	43487.7
TCGA-E2-A3DX-01A-21R-A213-07	4	3259.45	104.274	60.6395	75428.2
TCGA-BH-A0RX-01A-21R-A084-07	4	3267.95	130.45	17.6801	206585
TCGA-A2-A0EW-01A-21R-A115-07	4	3300.39	40.0283	37.9029	63967.4
TCGA-A2-A25E-01A-11R-A169-07	4	3309.75	504.402	0.9434	57083.3
TCGA-A2-A0SX-01A-12R-A084-07	4	3312.46	115.928	583.815	85385.7
TCGA-BH-A202-01A-11R-A14M-07	4	3318.48	326.814	11.998	78448.4
TCGA-A7-A13D-01A-13R-A12P-07	4	3339.9	374.124	3.6559	165120
TCGA-AO-A0J4-01A-11R-A034-07	4	3364.22	192.977	8.6674	131718
TCGA-C8-A12M-01A-11R-A115-07	4	3389.16	670.001	0.5364	31688.5
TCGA-A1-A0SO-01A-22R-A084-07	4	3414.02	51.9079	0.5407	82666
TCGA-E9-A1RB-01A-11R-A157-07	4	3424.3	301.249	86.1082	102784
TCGA-D8-A1JP-01A-11R-A13Q-07	4	3433.72	376.081	102.786	95909.2
TCGA-A2-A0D0-01A-11R-A00Z-07	4	3435.34	178.336	14.0033	197222
TCGA-B6-A0RU-01A-11R-A084-07	4	3449.24	108.576	45.7722	131495
TCGA-BH-A0C7-01B-11R-A115-07	4	3472.48	200.847	19.5376	46368.5
TCGA-A2-A0T5-01A-21R-A084-07	4	3475.52	169.964	121.455	102380
TCGA-AR-A1AW-01A-21R-A12P-07	4	3478.62	99.1298	13.9992	96902.1
TCGA-EW-A1PB-01A-11R-A144-07	4	3497.64	228.163	11.9406	102013
TCGA-D8-A27I-01A-11R-A16F-07	4	3520.84	196.444	63.8298	97807.1
TCGA-A2-A0T3-01A-21R-A115-07	4	3521.84	240.956	8.4382	31773.1
TCGA-A8-A09C-01A-11R-A00Z-07	4	3523.51	247.345	2.8554	56490.8
TCGA-D8-A1XF-01A-11R-A14D-07	4	3523.72	670.569	0	40075.1
TCGA-AO-A03P-01A-11R-A00Z-07	4	3532.52	334.252	7.6801	56039.1
TCGA-A2-A04R-01A-41R-A109-07	4	3549.76	286.154	9.0555	57892.6
TCGA-E2-A1LG-01A-21R-A14M-07	4	3550.06	80.774	1538.39	62687.7
TCGA-AR-A1AI-01A-11R-A12P-07	4	3585.77	47.3111	4.4248	133222
TCGA-AN-A0FD-01A-11R-A034-07	4	3589.37	134.055	57.8551	113840
TCGA-A7-A3IZ-01A-11R-A213-07	4	3658.21	65.313	1.692	43015.9
TCGA-BH-A0B2-01A-11R-A10J-07	4	3660.5	284.422	97.1676	87755.7
TCGA-E2-A14X-01A-11R-A115-07	4	3663.23	71.8966	9.2367	128078
TCGA-E2-A14Y-01A-21R-A12D-07	4	3679.72	322.922	103.229	154235
TCGA-A7-A0CD-01A-11R-A00Z-07	4	3679.76	158.232	6.9808	33758.6
TCGA-AR-A24K-01A-11R-A169-07	4	3689.01	421.223	10.2881	55866
TCGA-AN-A0XV-01A-11R-A109-07	4	3723.85	67.9916	41.4923	72162.1
TCGA-E2-A1AZ-01A-11R-A12P-07	4	3755.44	86.2716	11.2528	54484.6
TCGA-C8-A27B-01A-11R-A169-07	4	3762.99	90.0548	2.8713	75467.5
TCGA-C8-A12K-01A-21R-A115-07	4	3767.74	210.055	3.7014	127680
TCGA-EW-A1P4-01A-21R-A144-07	4	3774.87	74.4115	4.9355	147399
TCGA-AN-A0FX-01A-11R-A034-07	4	3786.6	312.919	26.1563	121054
TCGA-AQ-A04H-01B-11R-A10J-07	4	3796.36	109.315	1.7632	77030.6
TCGA-AR-A0TW-01A-11R-A084-07	4	3797.03	104.442	7.2256	110165
TCGA-EW-A1P0-01A-11R-A144-07	4	3798.93	445.487	3859.25	96223.9
TCGA-BH-A1FL-01A-11R-A13Q-07	4	3826.3	195.012	7.313	51556.4
TCGA-B6-A0RT-01A-21R-A084-07	4	3831.19	207.916	58.8142	116440
TCGA-AR-A2LK-01A-11R-A180-07	4	3843.78	252.305	10.9302	56595.6
TCGA-E2-A1LA-01A-11R-A144-07	4	3874.5	375.167	15.1313	116084
TCGA-A2-A0ES-01A-11R-A115-07	4	3887.81	86.9323	36.779	81224.5
TCGA-AR-A2LE-01A-11R-A180-07	4	3896.21	174.651	6.487	46834.8
TCGA-AR-A2LN-01A-21R-A18M-07	4	3912.67	86.7751	104.575	76379.9
TCGA-A2-A0EX-01A-21R-A034-07	4	3915.94	279.772	88.4413	111658
TCGA-A8-A08T-01A-21R-A00Z-07	4	3930.78	341.098	6.6556	72789.4
TCGA-BH-A1FD-01A-11R-A13Q-07	4	3940.26	686.485	6.6705	94236.9
TCGA-AN-A0FY-01A-11R-A034-07	4	3961.08	411.212	25.5817	73418.4
TCGA-A8-A09Q-01A-11R-A00Z-07	4	3962.05	473.994	1.9627	76172.4
TCGA-A2-A0YL-01A-21R-A109-07	4	4008.33	110.835	50.933	63906.1
TCGA-A8-A06O-01A-11R-A00Z-07	4	4012.92	824.679	2.3795	72684.6
TCGA-BH-A1FN-01A-11R-A13Q-07	4	4021.63	385.582	15.0732	174631
TCGA-B6-A0I1-01A-11R-A21T-07	4	4041.38	391.529	7.7595	107613
TCGA-A8-A092-01A-11R-A00Z-07	4	4056	352.516	24.1288	64113.8
TCGA-E2-A1LK-01A-21R-A14D-07	4	4086.08	505.918	117.382	109131
TCGA-AR-A1AR-01A-31R-A137-07	4	4092.19	72.4172	1.9773	108724
TCGA-AC-A23G-01A-11R-A213-07	4	4106.1	84.3023	63.9535	163839
TCGA-A7-A0DC-01A-11R-A00Z-07	4	4119.48	468.304	9.1585	46879.5
TCGA-A2-A3KC-01A-11R-A213-07	4	4124.98	183.916	55.0328	78554.2
TCGA-B6-A0RE-01A-11R-A056-07	4	4143.92	113.051	7.7168	178183
TCGA-AR-A0TV-01A-21R-A084-07	4	4158.47	127.382	7.6989	56521.3
TCGA-A2-A0SV-01A-11R-A084-07	4	4214.29	290.311	4.7823	164636
TCGA-AR-A1AJ-01A-21R-A12P-07	4	4231.21	69.6178	4.2544	113902
TCGA-E9-A1N8-01A-11R-A144-07	4	4234.38	142.32	9.3941	59473.9
TCGA-AR-A2LR-01A-12R-A18M-07	4	4237.58	172.844	15.051	73879
TCGA-B6-A0I2-01A-11R-A034-07	4	4248.93	261.105	3088.61	152280
TCGA-AR-A24S-01A-11R-A169-07	4	4293.91	302.793	1.4656	98897.7
TCGA-A2-A259-01A-11R-A16F-07	4	4345.08	442.937	19.9073	86794.9
TCGA-EW-A1OY-01A-11R-A144-07	4	4354.01	314.212	65.1163	73415.5
TCGA-D8-A1JM-01A-11R-A13Q-07	4	4368.35	228.685	0.307	71220.3
TCGA-BH-A18R-01A-11R-A12D-07	4	4392.87	146.211	6.8351	55202.7
TCGA-E2-A154-01A-11R-A115-07	4	4403.58	230.616	12.9225	71575.5
TCGA-B6-A0RS-01A-11R-A084-07	4	4466.22	59.0278	175.189	183429
TCGA-C8-A1HJ-01A-11R-A13Q-07	4	4491.6	270.658	2.8011	185186
TCGA-BH-A18G-01A-11R-A12D-07	4	4519.38	165.625	10	138151
TCGA-C8-A135-01A-11R-A115-07	4	4574.19	135.023	4.1475	123035
TCGA-A2-A0ST-01A-12R-A084-07	4	4591.59	67.5864	39.3541	130654
TCGA-D8-A27W-01A-11R-A16F-07	4	4602.7	501.35	15.4601	46714.1
TCGA-GM-A2DM-01A-11R-A180-07	4	4644.91	142.456	0	51680
TCGA-B6-A0IQ-01A-11R-A034-07	4	4664.44	189.265	6.8987	96085.8
TCGA-A2-A0CT-01A-31R-A056-07	4	4670.99	229.933	3.7625	55507.9
TCGA-BH-A209-01A-11R-A157-07	4	4707.01	597.514	870.672	100211
TCGA-BH-A0HX-01A-21R-A056-07	4	4791.92	600.896	6.863	97783.2
TCGA-B6-A1KF-01A-11R-A13Q-07	4	4799.81	102.285	1.4206	163369
TCGA-EW-A1P8-01A-11R-A144-07	4	4868.46	100.717	34.4086	128039
TCGA-A1-A0SP-01A-11R-A084-07	4	4907.7	124.042	7.2966	104936
TCGA-D8-A27R-01A-11R-A16F-07	4	4926.07	436.199	23.8226	80400.9
TCGA-E2-A1LL-01A-11R-A144-07	4	4963.29	713.977	1.7274	269241
TCGA-AO-A0J6-01A-11R-A034-07	4	4969.17	83.7429	1.7872	167434
TCGA-BH-A18Q-01A-12R-A12D-07	4	4975.54	169.014	14.4022	87720.9
TCGA-BH-A0HK-01A-11R-A056-07	4	4992.1	109.589	3.1612	77907.3
TCGA-A8-A08R-01A-11R-A034-07	4	5009.79	294.37	10.0979	108244
TCGA-A1-A0SK-01A-12R-A084-07	4	5105.89	356.445	1.2606	42110.6
TCGA-BH-A0B8-01A-21R-A056-07	4	5117.45	161.628	5.51	52313.2
TCGA-A2-A1FV-01A-11R-A13Q-07	4	5181.47	365.822	7.6086	56563.3
TCGA-E9-A244-01A-11R-A169-07	4	5191.11	298.269	86.2463	28054.2
TCGA-AO-A03R-01A-21R-A034-07	4	5227.84	845.936	204.974	123474
TCGA-AO-A0J7-01A-11R-A034-07	4	5266.38	267.812	1.7902	40440
TCGA-AR-A24W-01A-11R-A169-07	4	5290.49	100.992	51.7811	108131
TCGA-AR-A0U4-01A-11R-A109-07	4	5498.11	155.96	1.7176	108868
TCGA-BH-A18L-01A-32R-A12D-07	4	5580.64	267.919	0.8671	68045.4
TCGA-C8-A27A-01A-11R-A169-07	4	5595.47	1561.37	1.018	50825
TCGA-BH-A0BG-01A-11R-A115-07	4	5595.63	273.731	2.1999	116547
TCGA-BH-A18T-01A-11R-A12D-07	4	5705.04	129.891	0.2993	101818
TCGA-HN-A2NL-01A-11R-A18M-07	4	5960.32	267.393	1.7031	63113.7
TCGA-AN-A0AT-01A-11R-A034-07	4	5976.36	166.619	8.9363	119075
TCGA-D8-A1XZ-01A-11R-A14M-07	4	5993.27	2082.42	5.607	90058.9
TCGA-AR-A2LO-01A-31R-A18M-07	4	6060.61	190.036	17.4628	78398
TCGA-AR-A0TZ-01A-12R-A084-07	4	6097.15	203.159	3.8287	55406.1
TCGA-AN-A0FJ-01A-11R-A00Z-07	4	6138.66	91.8367	3.6014	128176
TCGA-BH-A1FE-06A-11R-A213-07	4	6223.2	82.9525	145.518	108408
TCGA-A2-A0YJ-01A-11R-A109-07	4	6341.74	114.321	0.4068	172304
TCGA-A7-A13E-01A-11R-A12P-07	4	6351.66	128.963	0.427	79497.8
TCGA-AR-A0TU-01A-31R-A109-07	4	6366.88	237.596	0	67970.6
TCGA-AN-A03Y-01A-21R-A00Z-07	4	6385.85	492.319	7.5027	69691.7
TCGA-EW-A1PG-01A-11R-A144-07	4	6428.18	175.691	16.0221	132875
TCGA-B6-A0X0-01A-21R-A115-07	4	6454.71	152.778	3.6232	49719.8
TCGA-AR-A1AU-01A-11R-A12P-07	4	6616.16	344.435	45.1718	79235.8
TCGA-B6-A0IJ-01A-11R-A034-07	4	6658.54	1138.81	6.4466	119835
TCGA-BH-A1F6-01A-11R-A13Q-07	4	6664.78	175.86	8.4866	131420
TCGA-A2-A0YM-01A-11R-A109-07	4	6827.05	86.5824	14.7249	97918.2
TCGA-E2-A158-01A-11R-A12D-07	4	6874.48	1101.53	0.6855	61753.7
TCGA-D8-A1XL-01A-11R-A14M-07	4	7014.48	583.998	4.6472	74916.3
TCGA-BH-A18V-01A-11R-A12D-07	4	7137.63	228.022	305.908	94147
TCGA-A2-A25D-01A-12R-A16F-07	4	7635.19	900.229	18.2788	99719.7
TCGA-A1-A0SB-01A-11R-A144-07	4	7752.22	31.9856	399.594	97950.2
TCGA-A2-A0CM-01A-31R-A034-07	4	8041.08	414.907	20.3069	104432
TCGA-AO-A1KO-01A-31R-A13Q-07	4	9094.01	159.585	359.652	53486.1
TCGA-BH-A0BO-01A-23R-A12D-07	4	9113.06	93.8921	51.332	118345
TCGA-E2-A1II-01A-11R-A144-07	4	9245.57	149.635	1.0428	77786.8
TCGA-D8-A1Y3-01A-11R-A157-07	4	9330.49	955.266	0.9467	67939.4
TCGA-AR-A24H-01A-11R-A169-07	4	9331.31	495.1	0.4666	57257.1
TCGA-E2-A14N-01A-31R-A137-07	4	9521.54	474.424	2.2336	172152
TCGA-A2-A0T0-01A-22R-A084-07	4	9947.38	278.173	8.5188	141796
TCGA-AR-A256-01A-11R-A169-07	4	11704.7	316	14.4981	96586.4
TCGA-A8-A07O-01A-11R-A00Z-07	4	15598.4	325.957	0.5981	96802
TCGA-BH-A1FC-01A-11R-A13Q-07	4	16654.9	179.478	4.1192	70249.7

## Sheet: Quartile data
Quartile	MYC|4609	PVT1|5820	RSPO1|284654	ACTB|60
1	99.085	73.1979	2.3804	117336
1	99.6997	37.353	3.2959	42131.8
1	101.025	39.5099	3.5009	74407.6
1	119.015	82.6067	6.119	107403
1	135.138	295.233	5.1795	79208.9
1	135.699	30.8776	0.5417	91063.1
1	138.207	76.1142	11.5173	217871
1	139.611	72.7062	10.4418	86188.9
1	163.023	8.1199	2.4984	76006.9
1	169.917	37.7186	8.0564	76922.5
1	171.912	69.7009	768.531	61391.9
1	179.282	24.1417	9.4984	101363
1	180.614	69.79	1.2924	47568.7
1	187.026	74.8102	6.9056	49523.2
1	189.144	72.3751	8.3406	39027.9
1	196.187	129.453	6.0211	54766.9
1	196.738	123.796	10.2735	148852
1	201.713	174.12	0	133665
1	203.354	76.3907	0.5323	47673.1
1	212.062	86.3288	32.1853	77291.9
1	226.201	44.9954	3.9792	73494.9
1	226.948	63.2292	3.7636	86834.8
1	232.567	73.1462	11.2533	48633.9
1	235.406	107.868	0	64411.2
1	239.052	20.096	17.0966	123582
1	242.485	222.194	9.018	108582
1	245.77	127.409	18.0979	147126
1	257.163	64.1615	13.9706	73462
1	260.694	79.488	0	61830.6
1	263.397	315.244	0	85427
1	281.703	81.7702	0	86573.1
1	283.078	23.5571	66.3526	118279
1	292.84	54.8709	15.5516	57700.4
1	293.818	78.3939	6.0548	77108.3
1	294.078	19.6277	20.3046	75599.7
1	301.806	108.914	44.1387	88487.2
1	304.024	23.845	18.3423	53621
1	307.942	456.492	235.656	95620.1
1	320.354	71.1897	0.4876	94701.9
1	324.324	74.5256	23.9218	94880.7
1	331.334	95.5238	8.7679	121811
1	332.793	50.4723	8.9069	137037
1	332.926	64.8357	18.7818	61484.3
1	337.133	83.0834	15.2969	66158.4
1	339.154	67.3265	3.0259	58344.1
1	339.649	55.7895	48.0702	111462
1	341.824	57.5185	14.7905	106907
1	342.72	92.442	9.929	108340
1	344.311	147.705	7.3187	85599.1
1	345.631	64.6259	18.315	53009.7
1	350.435	98.1217	37.8469	102448
1	355.065	49.3506	2.5974	50985.5
1	362.568	141.562	2.9424	96464.4
1	365.132	111.76	6.1238	93947.4
1	366.17	131.347	56.8433	74450.6
1	367.653	152.677	0.8775	144442
1	370.023	92.1502	2.2753	88845.6
1	372.381	71.4919	8.6859	82850.9
1	373.392	88.5078	2.2127	90907.2
1	374.895	67.2803	0.3347	150247
1	376.084	63.5071	2.3609	153854
1	378.779	95.8608	1.0363	46152.6
1	382.141	69.8992	10.7537	110294
1	383.274	52.7728	49.6422	129237
1	388.59	153.369	4.1339	64547.3
1	388.738	50.4938	3.2368	74267.3
1	390.49	102.209	126.544	160038
1	396.625	34.8101	4.7468	111330
1	402.181	45.2188	7.4478	73170.4
1	402.346	67.3807	19.3746	59775
1	404.26	30.6899	6.6142	112645
1	410.734	140.905	36.4245	124068
1	410.933	94.2122	13.8264	63754.3
1	414.581	61.0452	0.8783	39298.6
1	415.985	107.034	2.337	54014
1	416.107	156.428	3.0976	150440
1	418.776	39.435	99.7646	113453
1	426.887	99.0566	104.56	78228
1	429.12	192.586	2.5011	122492
1	431.442	43.7352	18.1245	56569.3
1	435.244	104.761	37.0804	94728.8
1	437.368	90.7811	0.7037	41523.2
1	438.027	132.758	0.25	61313.1
1	449.495	53.346	20.8333	112777
1	449.838	60.6061	5.2957	75517.5
1	450.085	54.9522	58.8774	67855.6
1	450.552	130.962	12.1261	166556
1	452.61	49.794	84.8214	113927
1	455.701	106.237	30.4033	133848
1	457.701	269.704	10.846	131719
1	471.113	57.148	10.3581	138958
1	476.924	116.436	8.1805	67780.8
1	478.236	104.466	16.7846	101757
1	478.733	132.998	12.9543	64055.8
1	490.632	101.525	27.0153	69878.4
1	500.174	70.8162	95.3509	55778.9
1	500.445	93.4055	9.861	50421.4
1	502.204	163.126	9.2184	112002
1	509.012	84.5245	58.4214	63811.1
1	519.892	61.0274	63.3449	56221.7
1	522.258	203.548	1.6129	58417.7
1	530.442	141.075	5.643	118938
1	533.107	31.6921	20.9394	130735
1	535.004	82.1665	1.4738	65401.3
1	543.908	72.7966	11.444	70137.5
1	545.275	70.4643	43.4639	110538
1	546.814	60.8758	85.7957	77530.1
1	551.707	71.7871	7.5301	81425.7
1	553.031	54.5421	39.5747	57684.9
1	553.49	53.6968	14.8699	104912
1	556.531	98.0607	5.1226	117348
1	556.572	112.883	31.0918	69346
1	563.057	55.4232	26.476	83339.5
1	564.929	59.3147	2.0155	103597
1	564.968	66.9614	33.0459	69233.1
1	565.611	148.352	7.4337	105040
1	570.019	29.6075	3.2897	61757
1	573.212	246.76	28.8046	151881
1	573.669	94.3468	8.8529	70776
1	575.267	20.3	1.4926	99306.8
1	578.97	18.0258	4.2918	113379
1	579.412	108.664	34.1515	100758
1	580.243	274.87	8.6655	150765
1	583.219	369.67	34.3879	190714
1	584.285	55.4818	29.7319	89110.7
1	589.719	108.335	19.4571	46208.5
1	591.255	8.5551	7.6046	123711
1	594.549	157.297	17.0358	104375
1	598.764	98.1465	21.8888	92867.8
1	604.153	134.037	4.7971	126162
1	613.799	111.875	62.122	78542.9
1	618.11	323.819	20.6693	129811
1	623.229	65.9185	2.9963	138023
1	625.102	118.13	3.2814	91021.8
1	627.635	137.204	12.3257	101151
1	627.772	133.244	7.614	66248
1	632.501	297.683	18.4165	120669
1	637.422	26.1021	2.648	119890
1	640.881	176.989	7.8335	27202.9
1	644.669	74.8064	9.053	219777
1	646.301	258.448	9.0114	107201
1	650.207	316.84	53.2097	127461
1	653.213	153.594	0.4363	74937.1
1	654.297	220.125	2.5331	59690.7
1	654.762	115.942	4.1408	69696.9
1	658.944	138.156	49.7477	105390
1	659.067	43.2992	41.7665	100255
1	660.159	130.602	94.8584	46150.4
1	660.809	85.8194	6.9473	97734
1	661.635	514.817	1.5889	89132
1	662.027	76.4001	0.9712	88732.3
1	663.751	72.7688	10.5974	57579.2
1	665.965	41.8937	140.85	133483
1	668.918	20.4815	99.793	178154
1	674.164	49.3596	44.0487	69686.3
1	676.415	187.923	53.6149	77532.9
1	678.113	230.511	98.283	153079
1	686.902	244.916	1.7943	98762.9
1	690.409	41.5873	5.7258	53561.4
1	691.774	207.797	16.7649	48984.5
1	692.674	287.969	4.1691	91372.2
1	695.605	274.762	0.3625	167951
1	695.798	131.219	144.625	93165.5
1	706.766	73.3145	4.7963	77547.3
1	708.005	44.9475	45.9318	74222.4
1	711.596	187.383	2.5866	65706
1	712.248	406.519	13.9986	212488
1	716.527	176.859	4.3995	133925
1	719.018	70.7108	0.7443	54927.4
1	723.162	67.6471	11.0294	83382
1	724.443	41.8909	6.9178	67210.6
1	724.8	172.4	21.2	71211.6
1	725.871	222.267	3.8046	112882
1	727.12	176.958	5.8706	63711.1
1	739.342	74.9086	16.1389	162354
1	739.538	393.327	34.2406	76802.8
1	739.973	56.5737	13.2802	193875
1	740.581	28.6499	31.0047	75110.7
1	740.643	134.127	11.7656	90404
1	743.971	266.255	11.5763	188366
1	758.09	309.526	8.2761	116952
1	761.641	100.293	16.607	70252
1	761.713	131.526	71.2851	91635.2
1	762.314	33.4209	25.7818	57907.5
1	762.673	87.5025	29.3437	59838.7
1	765.182	199.73	6.2978	98516.4
1	769.596	133.492	6.6508	192809
1	770.966	77.9055	0	45800.3
1	771.062	129.345	3.7582	91951.1
1	774.496	115.806	6.694	70066.4
1	775.353	186.847	15.3657	113950
1	775.541	173.005	5.22	281034
1	778.534	62.0745	92.511	125496
1	782.734	41.7266	1.4388	75564.7
1	788.756	162.817	13.081	104229
1	794.434	106.365	0	53761.1
1	799.04	163.212	12.6555	81443.2
1	800	57.468	26.458	71670.3
1	802.836	90.8768	12.3176	58327.6
1	815.971	146.168	0	38033
1	817.189	204.661	4.37	66726.9
1	817.901	156.026	35.9109	135899
1	821.099	179.95	71.7282	65320.1
1	823.049	39.6073	86.1786	79440.5
1	831.787	282.959	71.137	95352.2
1	835.694	116.147	16.9972	101134
1	836.55	321.335	0.8303	191104
1	838.163	53.0539	8.4708	306910
1	839.193	82.8493	123.51	107518
1	843.066	325.489	6.5206	147077
1	843.856	152.463	34.8244	126867
1	844.61	51.473	13.5966	74065.4
4	2691.32	213.014	110.122	134115
4	2695.11	245.01	62.2309	89076.3
4	2705.14	105.737	54.036	91403.6
4	2705.45	72.2658	24.5188	96952.8
4	2715.29	80.1672	2.0126	59950.6
4	2728.21	150.079	2.2568	27945.9
4	2731.91	175.016	26.5925	99000.9
4	2743.03	166.867	36.3102	71331.7
4	2747.58	141.199	0.3224	31533.5
4	2747.91	179.18	2.9017	55182.4
4	2749.11	288.666	1.771	36961
4	2755.13	771.261	18.3284	75033.7
4	2758.36	287.393	80.131	117636
4	2760.91	275.239	662.277	40076.4
4	2761.75	99.7268	67.4863	89356.8
4	2768.83	199.859	2.2456	71045.3
4	2779.8	162.644	5.9413	116230
4	2784.29	128.921	8.4205	109880
4	2786.78	343.152	15.0012	68695.4
4	2799.6	160.931	22.2672	77865.4
4	2805.6	140.961	80.703	119957
4	2812.59	61.4934	13.6652	88740.4
4	2824.49	440.469	8.9451	42345.8
4	2826.74	178.041	4.1728	121000
4	2831.47	161.97	9.5982	107160
4	2838.63	101.241	40.7292	67807.2
4	2845.17	312.482	1.887	57210.3
4	2846.6	79.5909	104.491	57603.4
4	2860.2	84.2856	23.6648	79340.6
4	2869.73	55.5979	6.1022	136067
4	2872.42	219.525	11.8802	82623.5
4	2874.59	99.8641	69.5315	119485
4	2882.62	188.565	7.9515	138885
4	2898.45	204.433	19.5171	128844
4	2907.26	114.646	4.8019	152869
4	2917.13	897.124	5.8919	45614.1
4	2929.67	324.029	18.8834	80346.5
4	2934.62	838.782	6.7308	34527.9
4	2941.47	130.732	4.8953	31135.3
4	2955.83	124.382	144.156	150771
4	2959.95	229.558	9.4524	60716.8
4	2962.58	42.2588	33.3309	117919
4	2970.53	49.6103	15.9127	98340.3
4	2976.78	258.273	8.8473	124788
4	2979.68	159.425	25.1487	69525.9
4	2989.05	182.076	12.1655	112787
4	3000	172.817	27.4527	123935
4	3003.11	208.856	29.4422	72628.9
4	3018.57	240.551	4.1564	170972
4	3030.39	214.841	1.7668	92045.9
4	3032.48	180.459	1.0871	66615
4	3045.41	177.23	22.8309	95209.1
4	3066.84	512.92	12.1315	61407.3
4	3067.6	163.32	220.883	128226
4	3096.64	227.591	8.7535	160333
4	3113.08	195.924	87.7712	71865.5
4	3121.38	198.567	20.1796	117509
4	3143.18	57.5629	0	59604.5
4	3165.51	524.711	8.622	53903.6
4	3167.57	101.238	37.4484	186493
4	3186.24	251.878	41.123	70469.4
4	3194.98	99.0924	66.6622	149696
4	3216.45	537.964	13.6598	98819.2
4	3221.25	392.824	17.0193	54117.8
4	3226.23	76.7888	5.8786	112878
4	3233.5	116.395	1.3227	33467.6
4	3237.41	95.1241	49.1581	74421.2
4	3239.24	41.5415	0	195170
4	3249.2	155.964	24.0706	125626
4	3258.24	170.769	4.1651	43487.7
4	3259.45	104.274	60.6395	75428.2
4	3267.95	130.45	17.6801	206585
4	3300.39	40.0283	37.9029	63967.4
4	3309.75	504.402	0.9434	57083.3
4	3312.46	115.928	583.815	85385.7
4	3318.48	326.814	11.998	78448.4
4	3339.9	374.124	3.6559	165120
4	3364.22	192.977	8.6674	131718
4	3389.16	670.001	0.5364	31688.5
4	3414.02	51.9079	0.5407	82666
4	3424.3	301.249	86.1082	102784
4	3433.72	376.081	102.786	95909.2
4	3435.34	178.336	14.0033	197222
4	3449.24	108.576	45.7722	131495
4	3472.48	200.847	19.5376	46368.5
4	3475.52	169.964	121.455	102380
4	3478.62	99.1298	13.9992	96902.1
4	3497.64	228.163	11.9406	102013
4	3520.84	196.444	63.8298	97807.1
4	3521.84	240.956	8.4382	31773.1
4	3523.51	247.345	2.8554	56490.8
4	3523.72	670.569	0	40075.1
4	3532.52	334.252	7.6801	56039.1
4	3549.76	286.154	9.0555	57892.6
4	3550.06	80.774	1538.39	62687.7
4	3585.77	47.3111	4.4248	133222
4	3589.37	134.055	57.8551	113840
4	3658.21	65.313	1.692	43015.9
4	3660.5	284.422	97.1676	87755.7
4	3663.23	71.8966	9.2367	128078
4	3679.72	322.922	103.229	154235
4	3679.76	158.232	6.9808	33758.6
4	3689.01	421.223	10.2881	55866
4	3723.85	67.9916	41.4923	72162.1
4	3755.44	86.2716	11.2528	54484.6
4	3762.99	90.0548	2.8713	75467.5
4	3767.74	210.055	3.7014	127680
4	3774.87	74.4115	4.9355	147399
4	3786.6	312.919	26.1563	121054
4	3796.36	109.315	1.7632	77030.6
4	3797.03	104.442	7.2256	110165
4	3798.93	445.487	3859.25	96223.9
4	3826.3	195.012	7.313	51556.4
4	3831.19	207.916	58.8142	116440
4	3843.78	252.305	10.9302	56595.6
4	3874.5	375.167	15.1313	116084
4	3887.81	86.9323	36.779	81224.5
4	3896.21	174.651	6.487	46834.8
4	3912.67	86.7751	104.575	76379.9
4	3915.94	279.772	88.4413	111658
4	3930.78	341.098	6.6556	72789.4
4	3940.26	686.485	6.6705	94236.9
4	3961.08	411.212	25.5817	73418.4
4	3962.05	473.994	1.9627	76172.4
4	4008.33	110.835	50.933	63906.1
4	4012.92	824.679	2.3795	72684.6
4	4021.63	385.582	15.0732	174631
4	4041.38	391.529	7.7595	107613
4	4056	352.516	24.1288	64113.8
4	4086.08	505.918	117.382	109131
4	4092.19	72.4172	1.9773	108724
4	4106.1	84.3023	63.9535	163839
4	4119.48	468.304	9.1585	46879.5
4	4124.98	183.916	55.0328	78554.2
4	4143.92	113.051	7.7168	178183
4	4158.47	127.382	7.6989	56521.3
4	4214.29	290.311	4.7823	164636
4	4231.21	69.6178	4.2544	113902
4	4234.38	142.32	9.3941	59473.9
4	4237.58	172.844	15.051	73879
4	4248.93	261.105	3088.61	152280
4	4293.91	302.793	1.4656	98897.7
4	4345.08	442.937	19.9073	86794.9
4	4354.01	314.212	65.1163	73415.5
4	4368.35	228.685	0.307	71220.3
4	4392.87	146.211	6.8351	55202.7
4	4403.58	230.616	12.9225	71575.5
4	4466.22	59.0278	175.189	183429
4	4491.6	270.658	2.8011	185186
4	4519.38	165.625	10	138151
4	4574.19	135.023	4.1475	123035
4	4591.59	67.5864	39.3541	130654
4	4602.7	501.35	15.4601	46714.1
4	4644.91	142.456	0	51680
4	4664.44	189.265	6.8987	96085.8
4	4670.99	229.933	3.7625	55507.9
4	4707.01	597.514	870.672	100211
4	4791.92	600.896	6.863	97783.2
4	4799.81	102.285	1.4206	163369
4	4868.46	100.717	34.4086	128039
4	4907.7	124.042	7.2966	104936
4	4926.07	436.199	23.8226	80400.9
4	4963.29	713.977	1.7274	269241
4	4969.17	83.7429	1.7872	167434
4	4975.54	169.014	14.4022	87720.9
4	4992.1	109.589	3.1612	77907.3
4	5009.79	294.37	10.0979	108244
4	5105.89	356.445	1.2606	42110.6
4	5117.45	161.628	5.51	52313.2
4	5181.47	365.822	7.6086	56563.3
4	5191.11	298.269	86.2463	28054.2
4	5227.84	845.936	204.974	123474
4	5266.38	267.812	1.7902	40440
4	5290.49	100.992	51.7811	108131
4	5498.11	155.96	1.7176	108868
4	5580.64	267.919	0.8671	68045.4
4	5595.47	1561.37	1.018	50825
4	5595.63	273.731	2.1999	116547
4	5705.04	129.891	0.2993	101818
4	5960.32	267.393	1.7031	63113.7
4	5976.36	166.619	8.9363	119075
4	5993.27	2082.42	5.607	90058.9
4	6060.61	190.036	17.4628	78398
4	6097.15	203.159	3.8287	55406.1
4	6138.66	91.8367	3.6014	128176
4	6223.2	82.9525	145.518	108408
4	6341.74	114.321	0.4068	172304
4	6351.66	128.963	0.427	79497.8
4	6366.88	237.596	0	67970.6
4	6385.85	492.319	7.5027	69691.7
4	6428.18	175.691	16.0221	132875
4	6454.71	152.778	3.6232	49719.8
4	6616.16	344.435	45.1718	79235.8
4	6658.54	1138.81	6.4466	119835
4	6664.78	175.86	8.4866	131420
4	6827.05	86.5824	14.7249	97918.2
4	6874.48	1101.53	0.6855	61753.7
4	7014.48	583.998	4.6472	74916.3
4	7137.63	228.022	305.908	94147
4	7635.19	900.229	18.2788	99719.7
4	7752.22	31.9856	399.594	97950.2
4	8041.08	414.907	20.3069	104432
4	9094.01	159.585	359.652	53486.1
4	9113.06	93.8921	51.332	118345
4	9245.57	149.635	1.0428	77786.8
4	9330.49	955.266	0.9467	67939.4
4	9331.31	495.1	0.4666	57257.1
4	9521.54	474.424	2.2336	172152
4	9947.38	278.173	8.5188	141796
4	11704.7	316	14.4981	96586.4
4	15598.4	325.957	0.5981	96802
4	16654.9	179.478	4.1192	70249.7
